# Supplementary material
Source: PubMed Central journal article supplement (PMC2996418)

7.327  
7.311  
7.296  
7.262  
7.260  
7.246  
7.232  
7.160  
7.145

5.405  
5.391  
4.263  
4.249  
4.242  
4.235  
4.228  
4.213  
4.207  
4.199  
4.192  
4.178  
4.171  
4.164  
4.156  
4.142  
3.497  
3.488  
3.469  
3.459  
3.116  
3.104  
3.090  
2.880  
2.870  
2.860  
2.850  
2.839  
2.715  
2.695  
2.687  
2.666  
1.964  
1.957  
1.575  
1.570  
1.416  
1.408  
1.295  
1.293  
1.280  
1.278  
1.266  
1.264

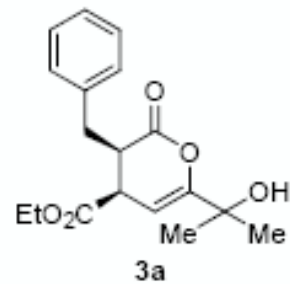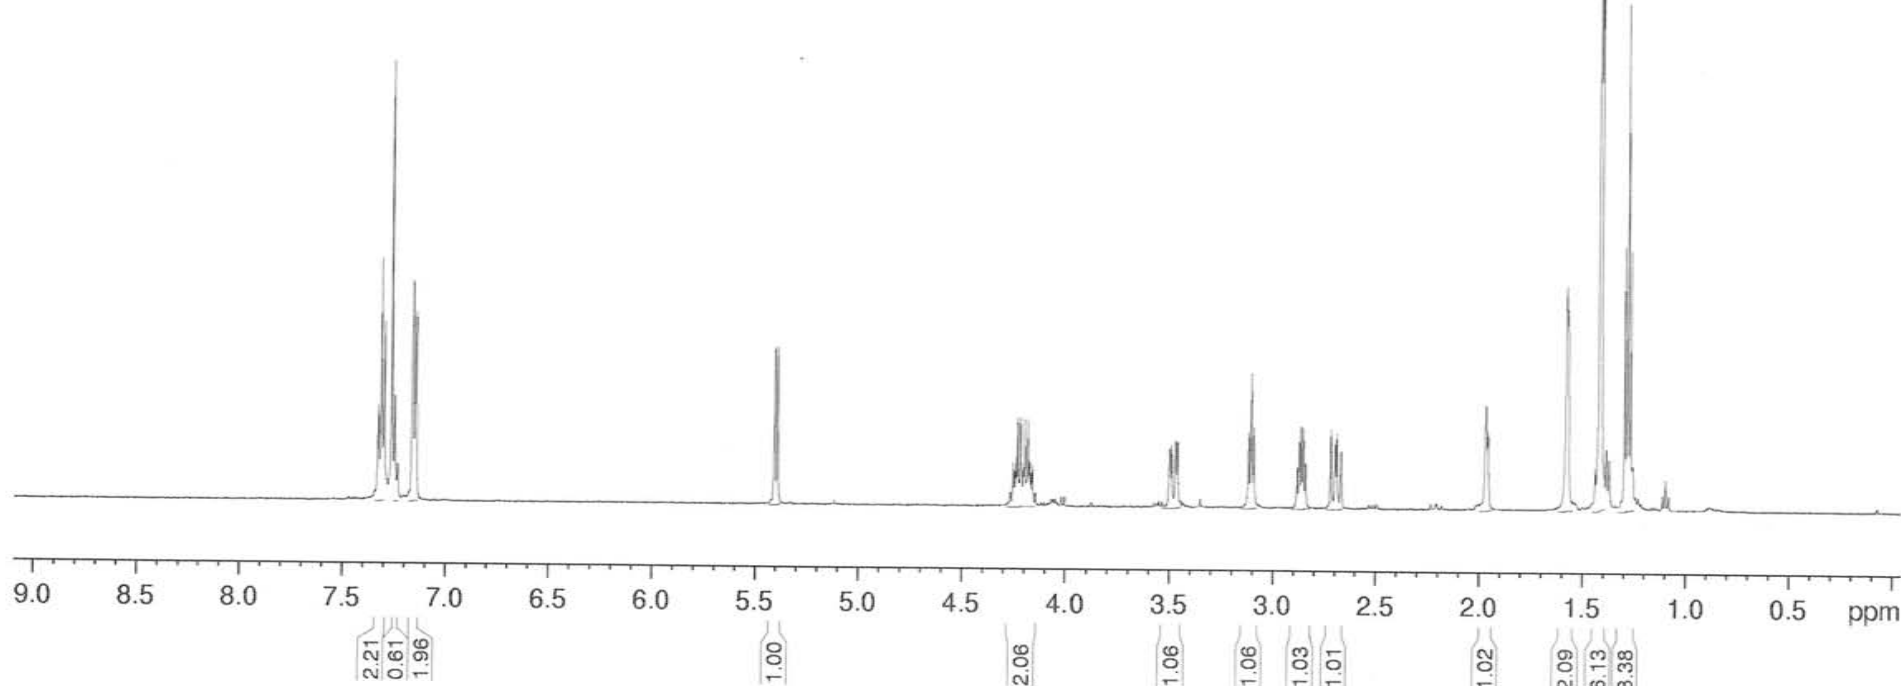

170.530  
169.065

159.978

138.117

129.115  
128.901  
127.002

96.112

77.470  
77.216  
76.962  
70.490

61.654

42.814  
40.050

33.306  
27.549  
27.522

14.220

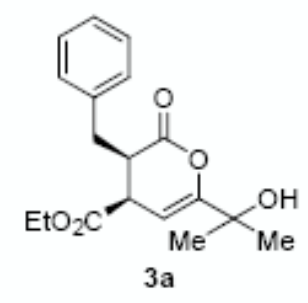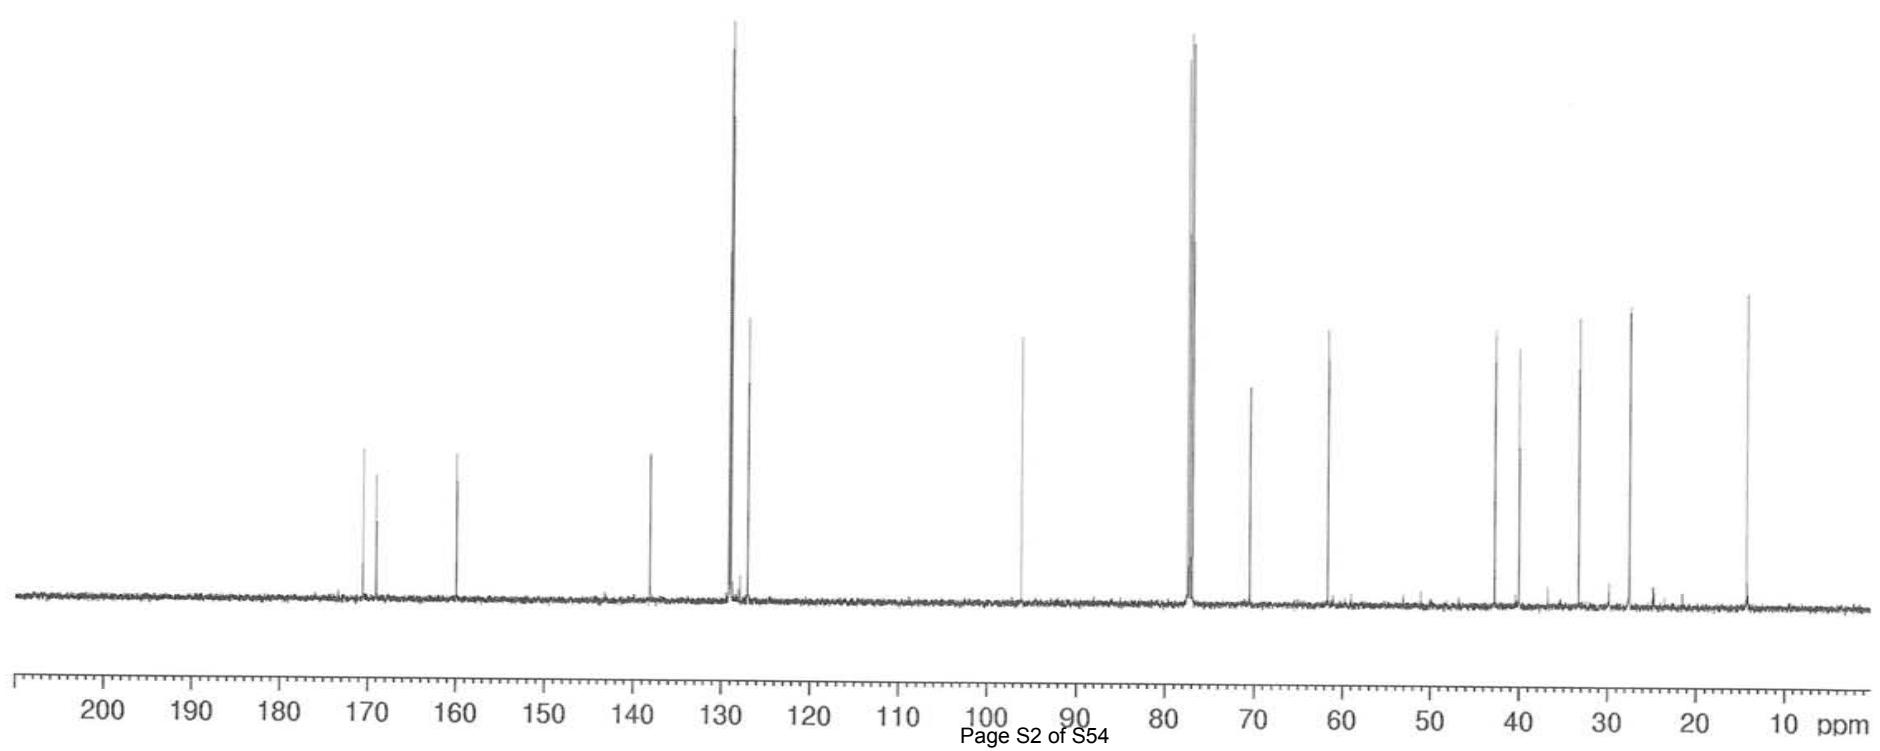

7.441  
7.425  
7.260  
7.049  
7.032

5.416  
5.403

4.238  
4.231  
4.224  
4.217  
4.209  
4.202  
4.188  
4.181  
4.174  
4.167  
4.160  
4.153

3.430  
3.420  
3.401  
3.391

3.110  
3.097

3.084  
2.841  
2.831

2.822  
2.811

2.800  
2.682  
2.662  
2.653  
2.634

1.427  
1.416  
1.408

1.287  
1.273  
1.258

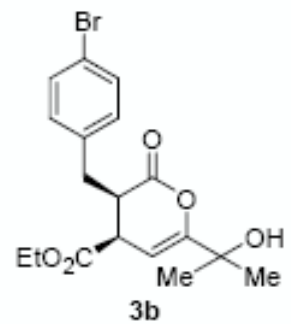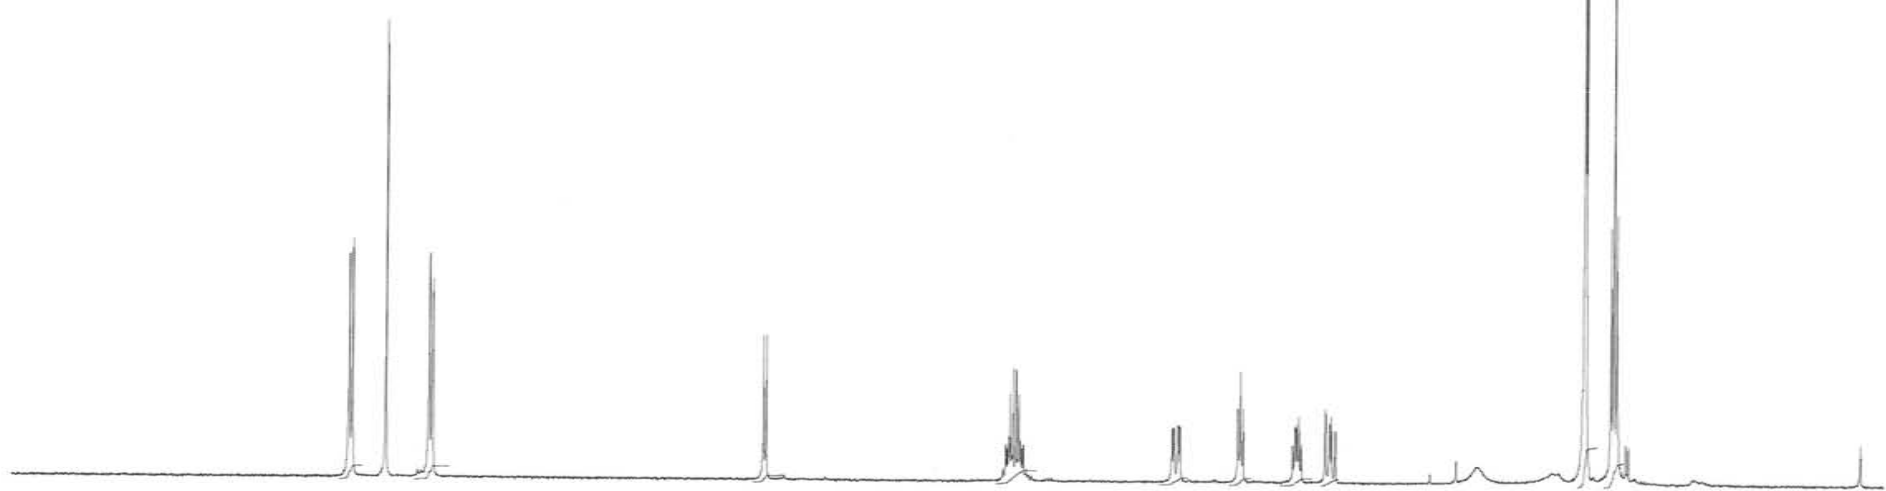

1.95

2.04

1.00

2.05

0.99

0.98

1.01

0.95

5.93

3.61

170.302  
168.626

160.045

137.136  
132.008  
130.862

120.941

95.962

77.409  
77.155  
76.901  
70.532

61.739

42.672  
40.193

32.830  
27.575  
27.545

14.221

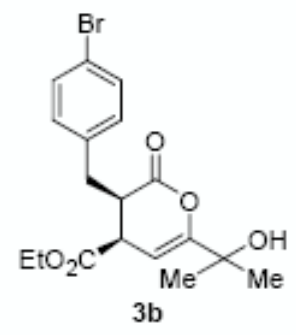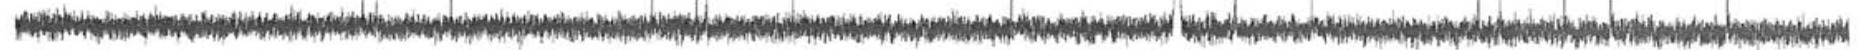

200 190 180 170 160 150 140 130 120 110 100 90 80 70 60 50 40 30 20 10 ppm

7.261  
7.260  
7.072  
7.055  
6.850  
6.833

5.405  
5.391

4.242  
4.227  
4.220  
4.206  
4.188  
4.173  
4.166  
4.152  
3.789  
3.422  
3.412  
3.393  
3.384  
3.124  
3.112  
3.099  
2.821  
2.811  
2.801  
2.658  
2.638  
2.629  
2.609

1.413  
1.405  
1.290  
1.275  
1.261

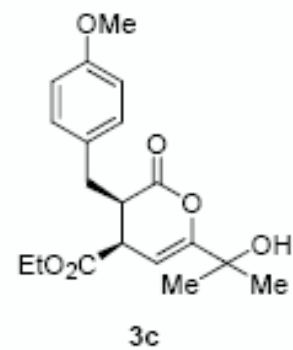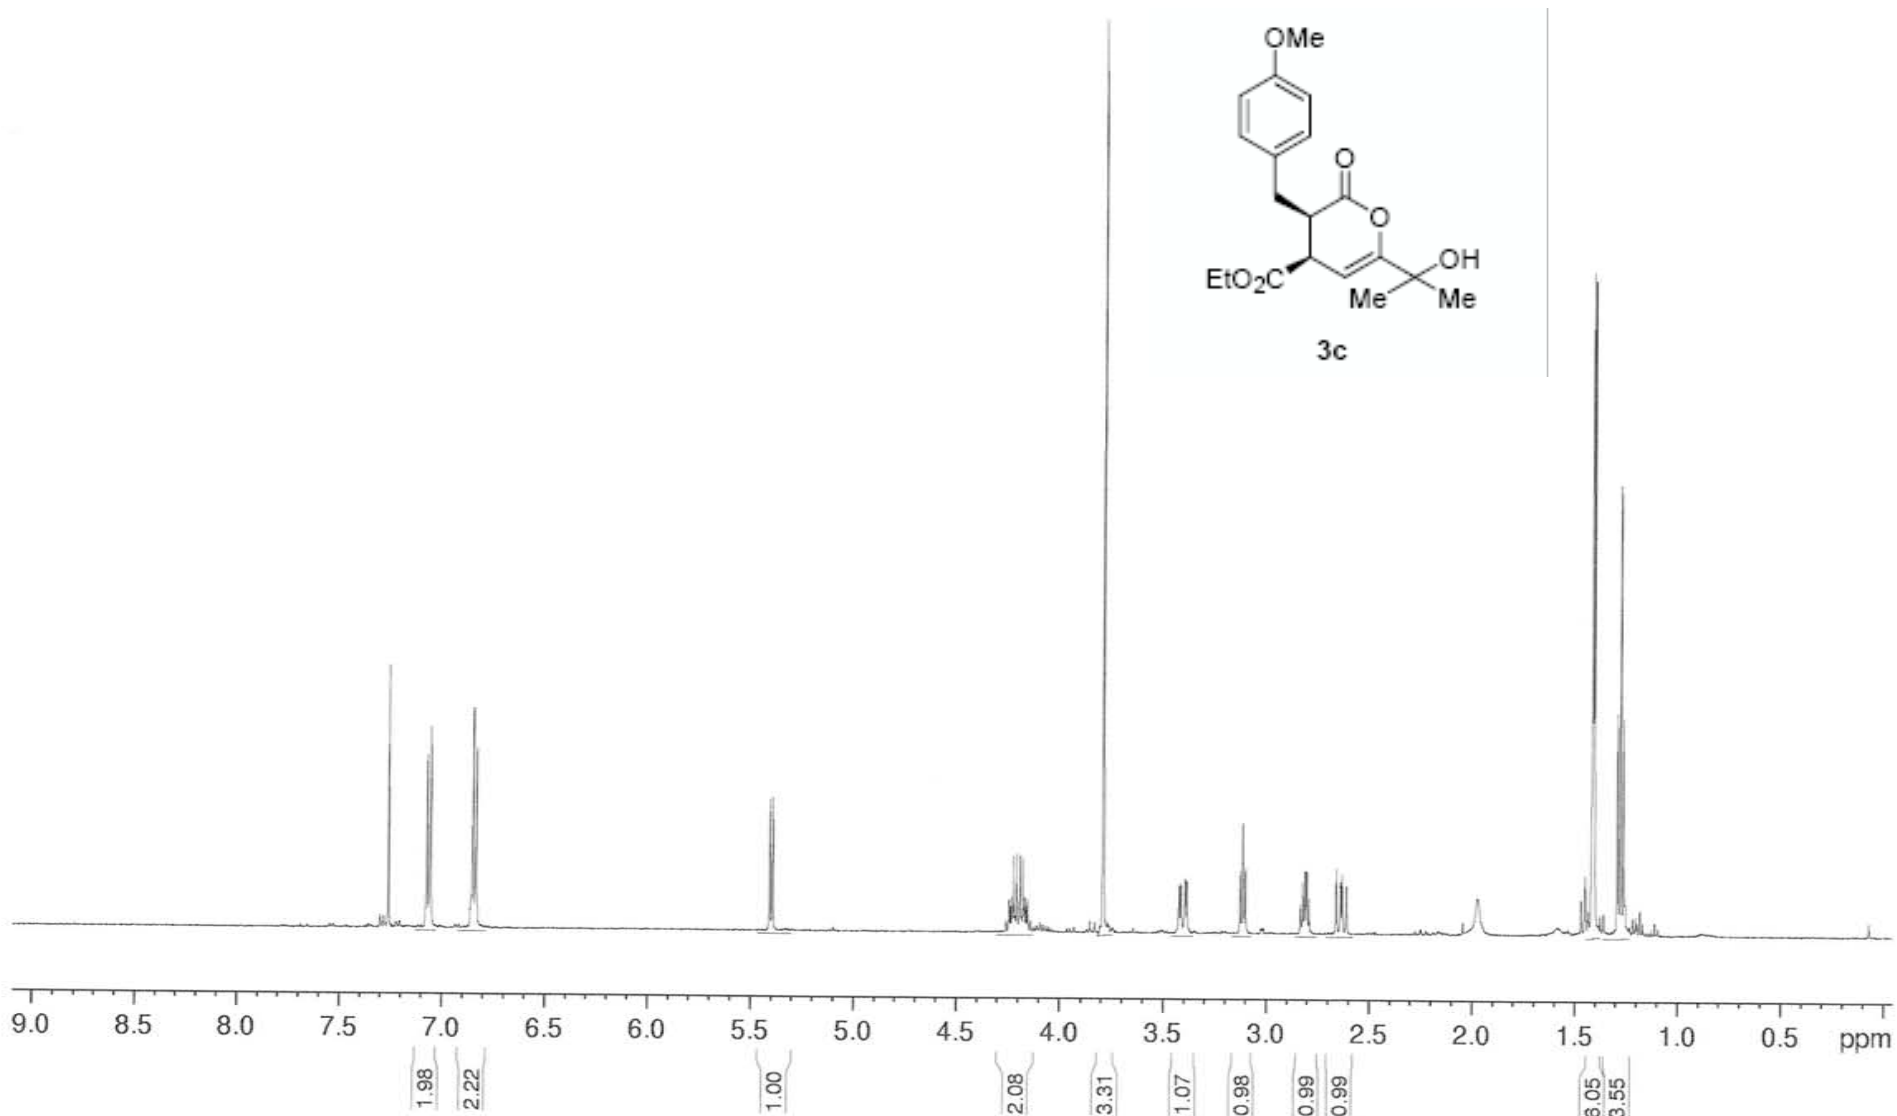

170.537  
169.127  
159.875  
158.586  
130.122  
129.952  
114.273  
96.119  
77.454  
77.201  
76.947  
70.540  
61.678  
55.431  
42.998  
39.971  
32.397  
27.568  
27.526  
14.269

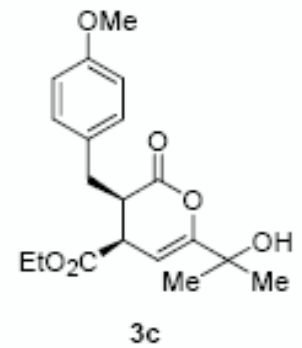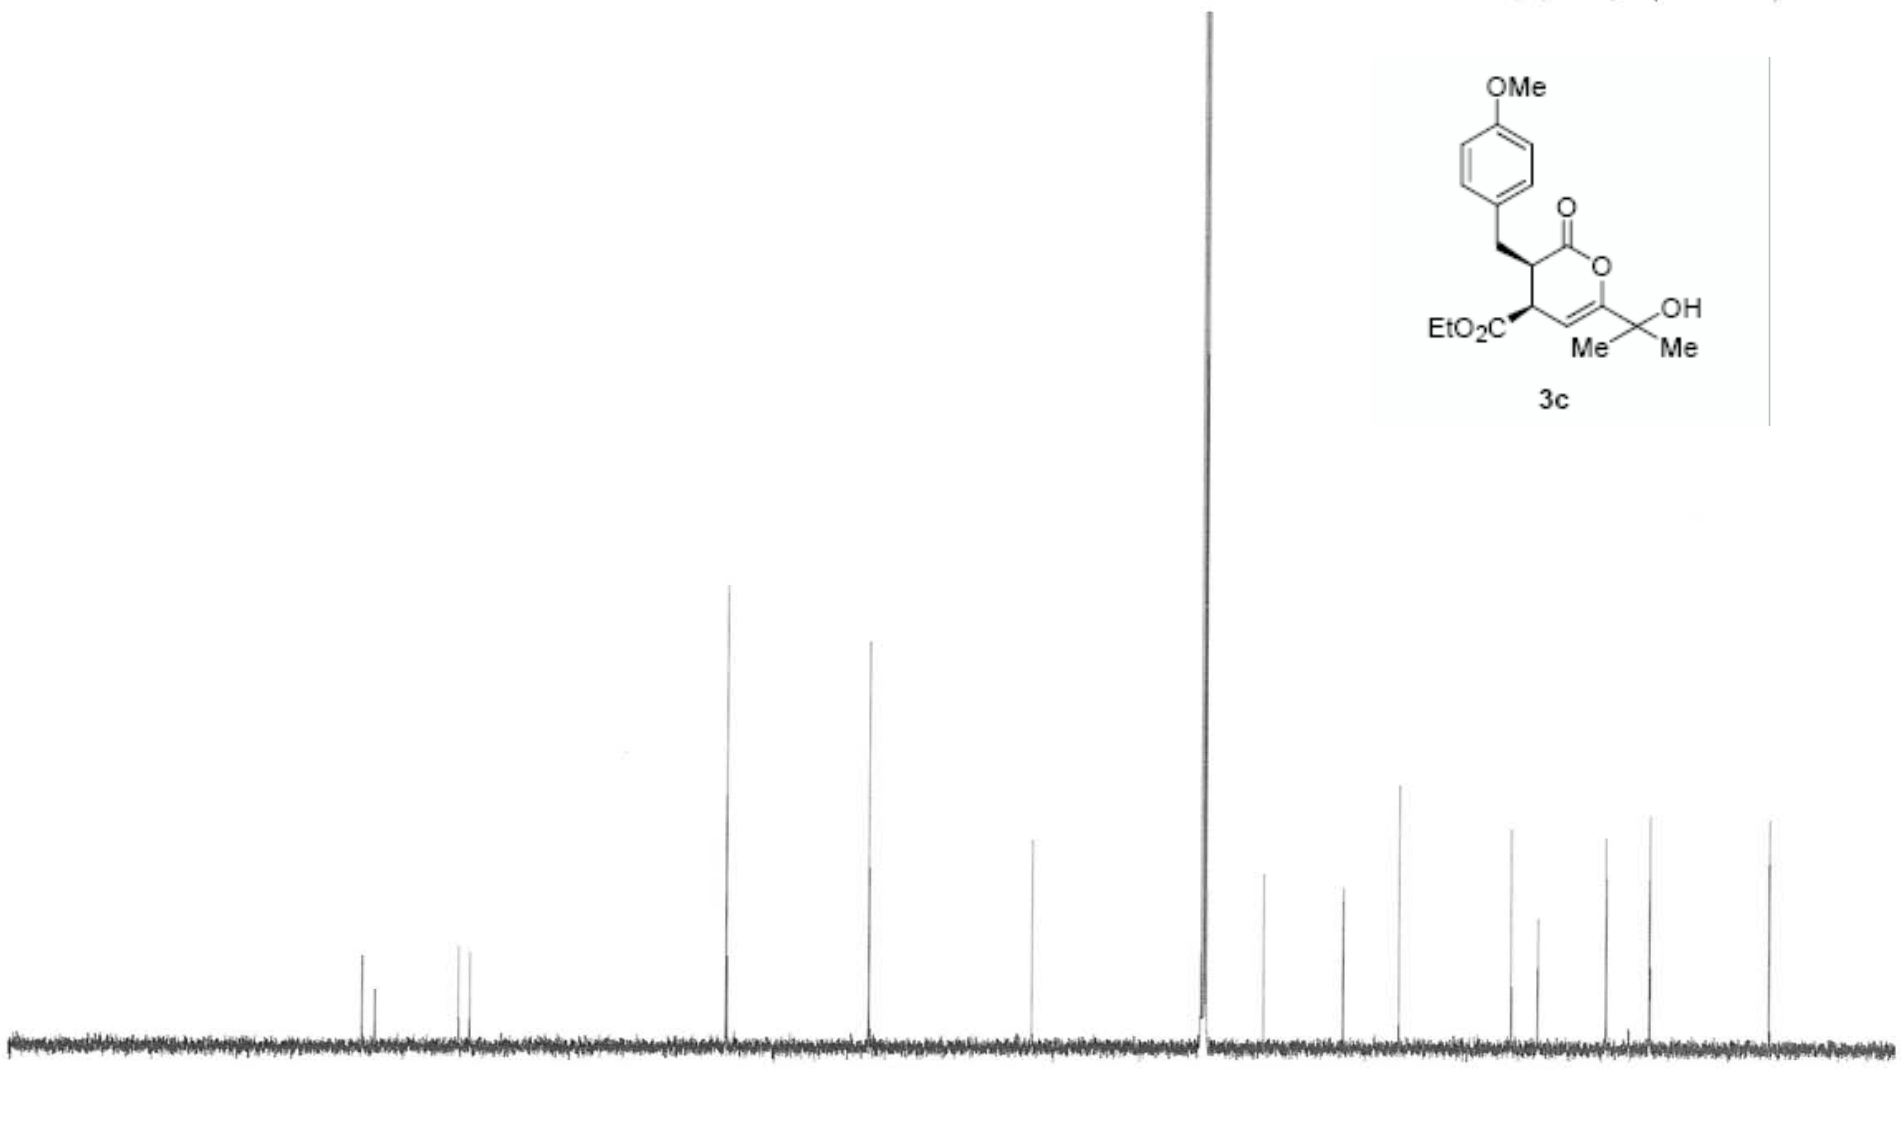

200 190 180 170 160 150 140 130 120 110 100 90 80 70 60 50 40 30 20 10 ppm

7.324  
7.323  
7.261

6.301  
6.296  
6.292  
6.075  
6.069

5.451  
5.437

4.230  
4.222  
4.216  
4.208  
4.194  
4.180  
4.169  
4.154  
4.146  
4.140  
4.132  
3.463  
3.453  
3.432  
3.422  
3.181  
3.167  
3.155  
3.025  
3.013  
3.003  
2.993  
2.983  
2.881  
2.861  
2.850  
2.830

1.574  
1.419  
1.410  
1.273  
1.259  
1.245

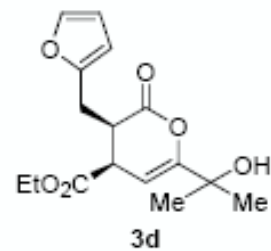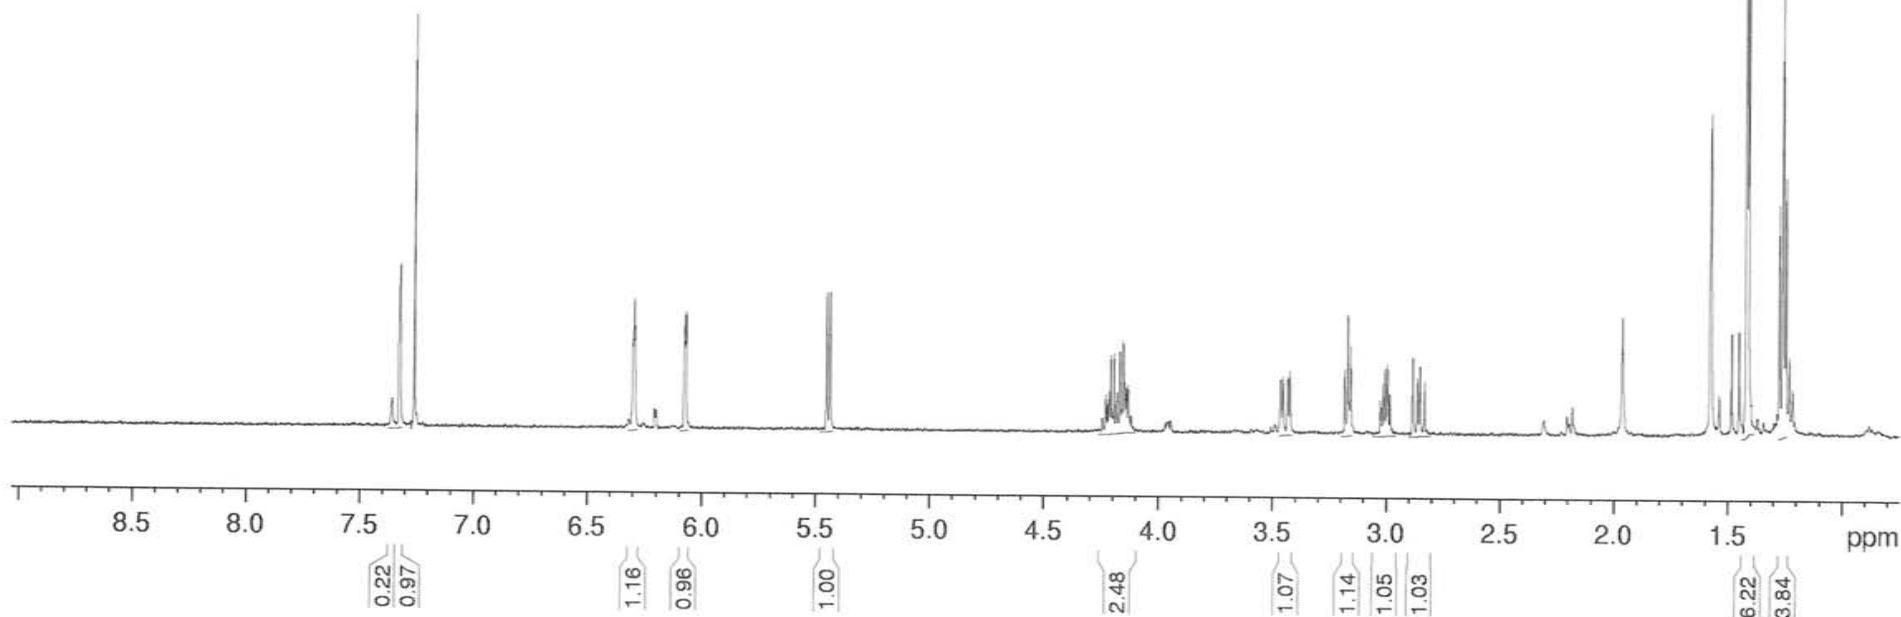

170.278  
168.565  
159.977  
151.690  
142.004  
110.574  
107.696  
96.042  
77.430  
77.176  
76.922  
70.539  
61.634  
40.248  
40.089  
27.569  
25.919  
14.199

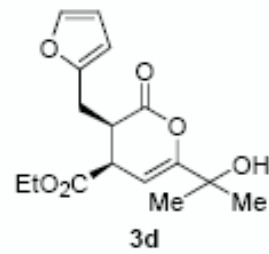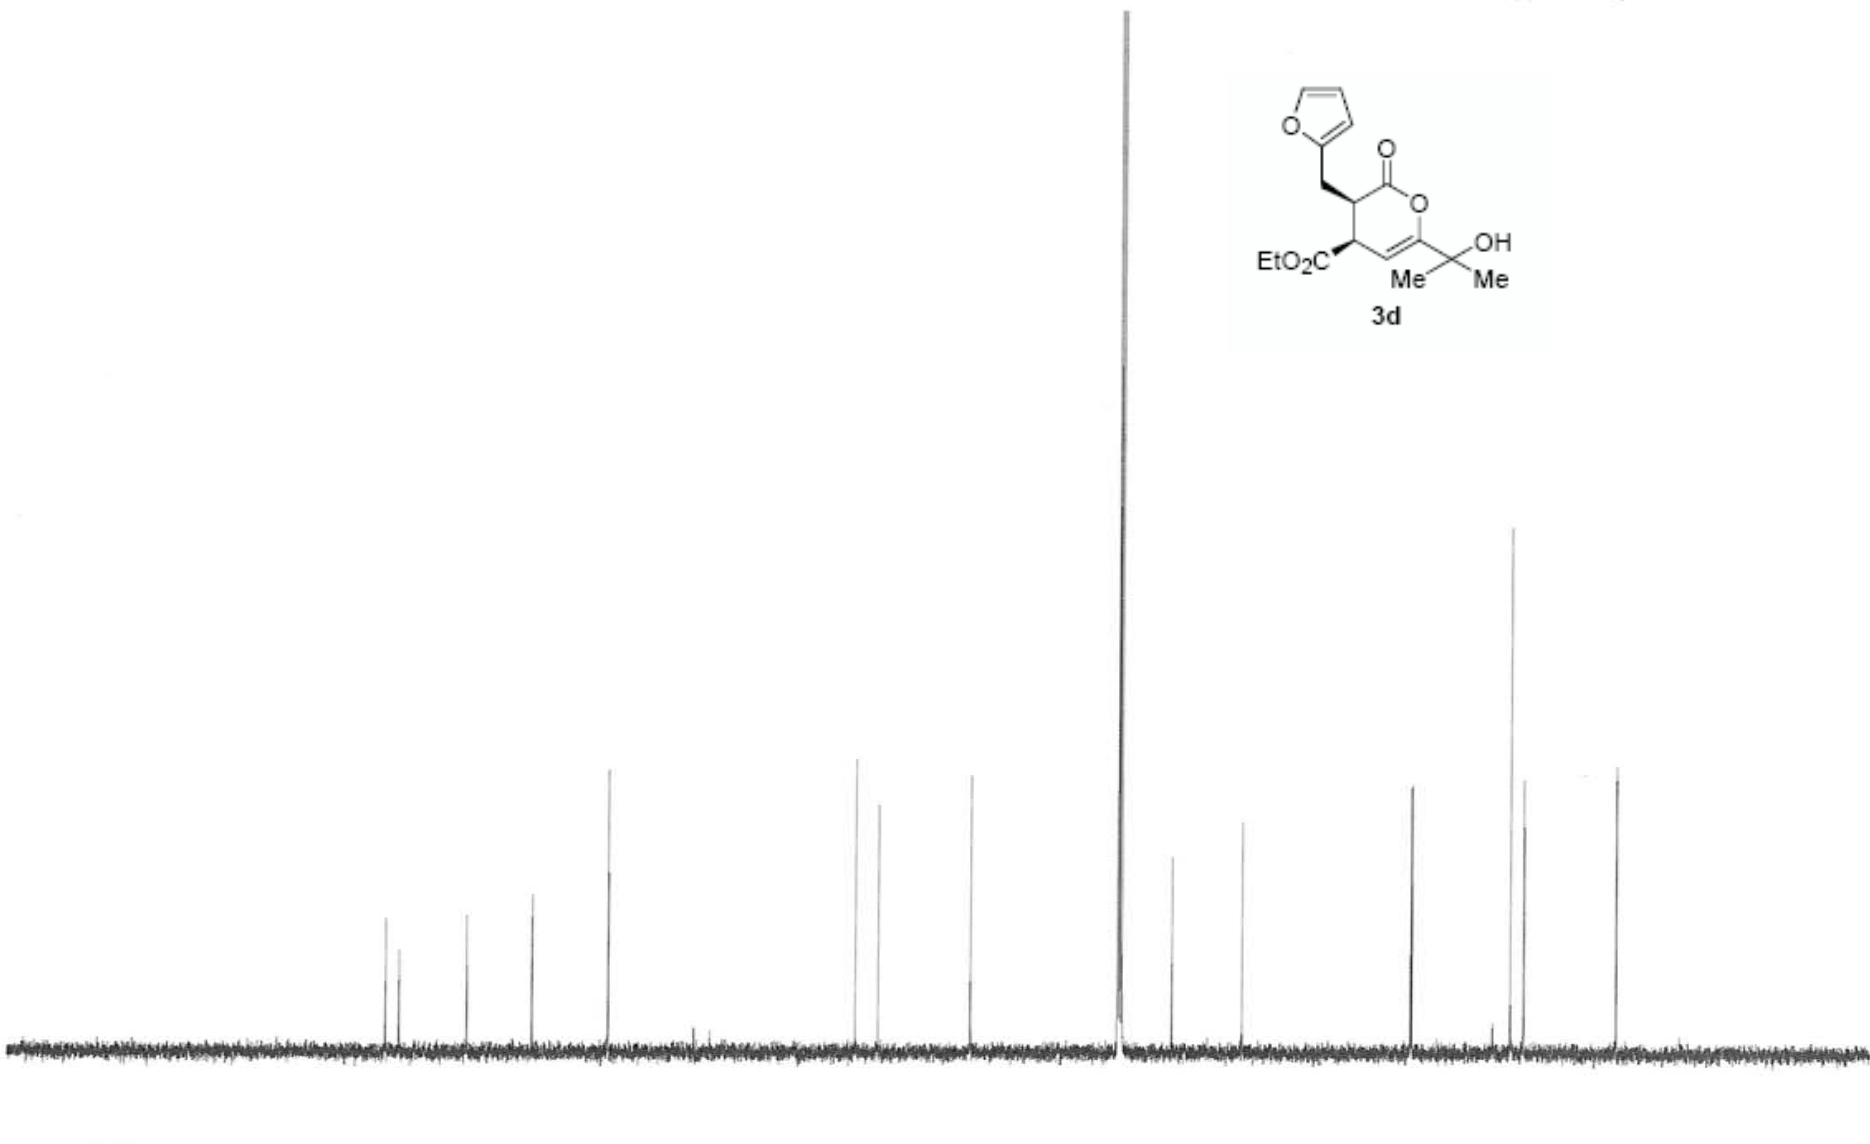

210 200 190 180 170 160 150 140 130 120 110 100 90 80 70 60 50 40 30 20 10 0 ppm



9.992

7.845  
7.829  
7.354  
7.338  
7.261

5.428  
5.414  
4.253  
4.245  
4.238  
4.231  
4.217  
4.202  
4.188  
4.181  
4.174  
4.167  
3.552  
3.542  
3.524  
3.514  
3.108  
3.096  
3.083  
2.928  
2.917  
2.909  
2.906  
2.898  
2.887  
2.816  
2.797  
2.787  
2.768  
1.420  
1.411  
1.295  
1.281  
1.267

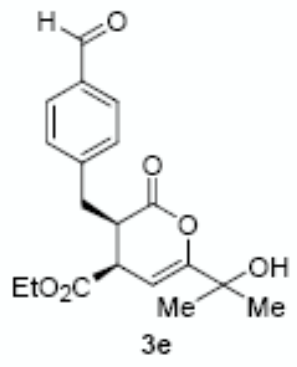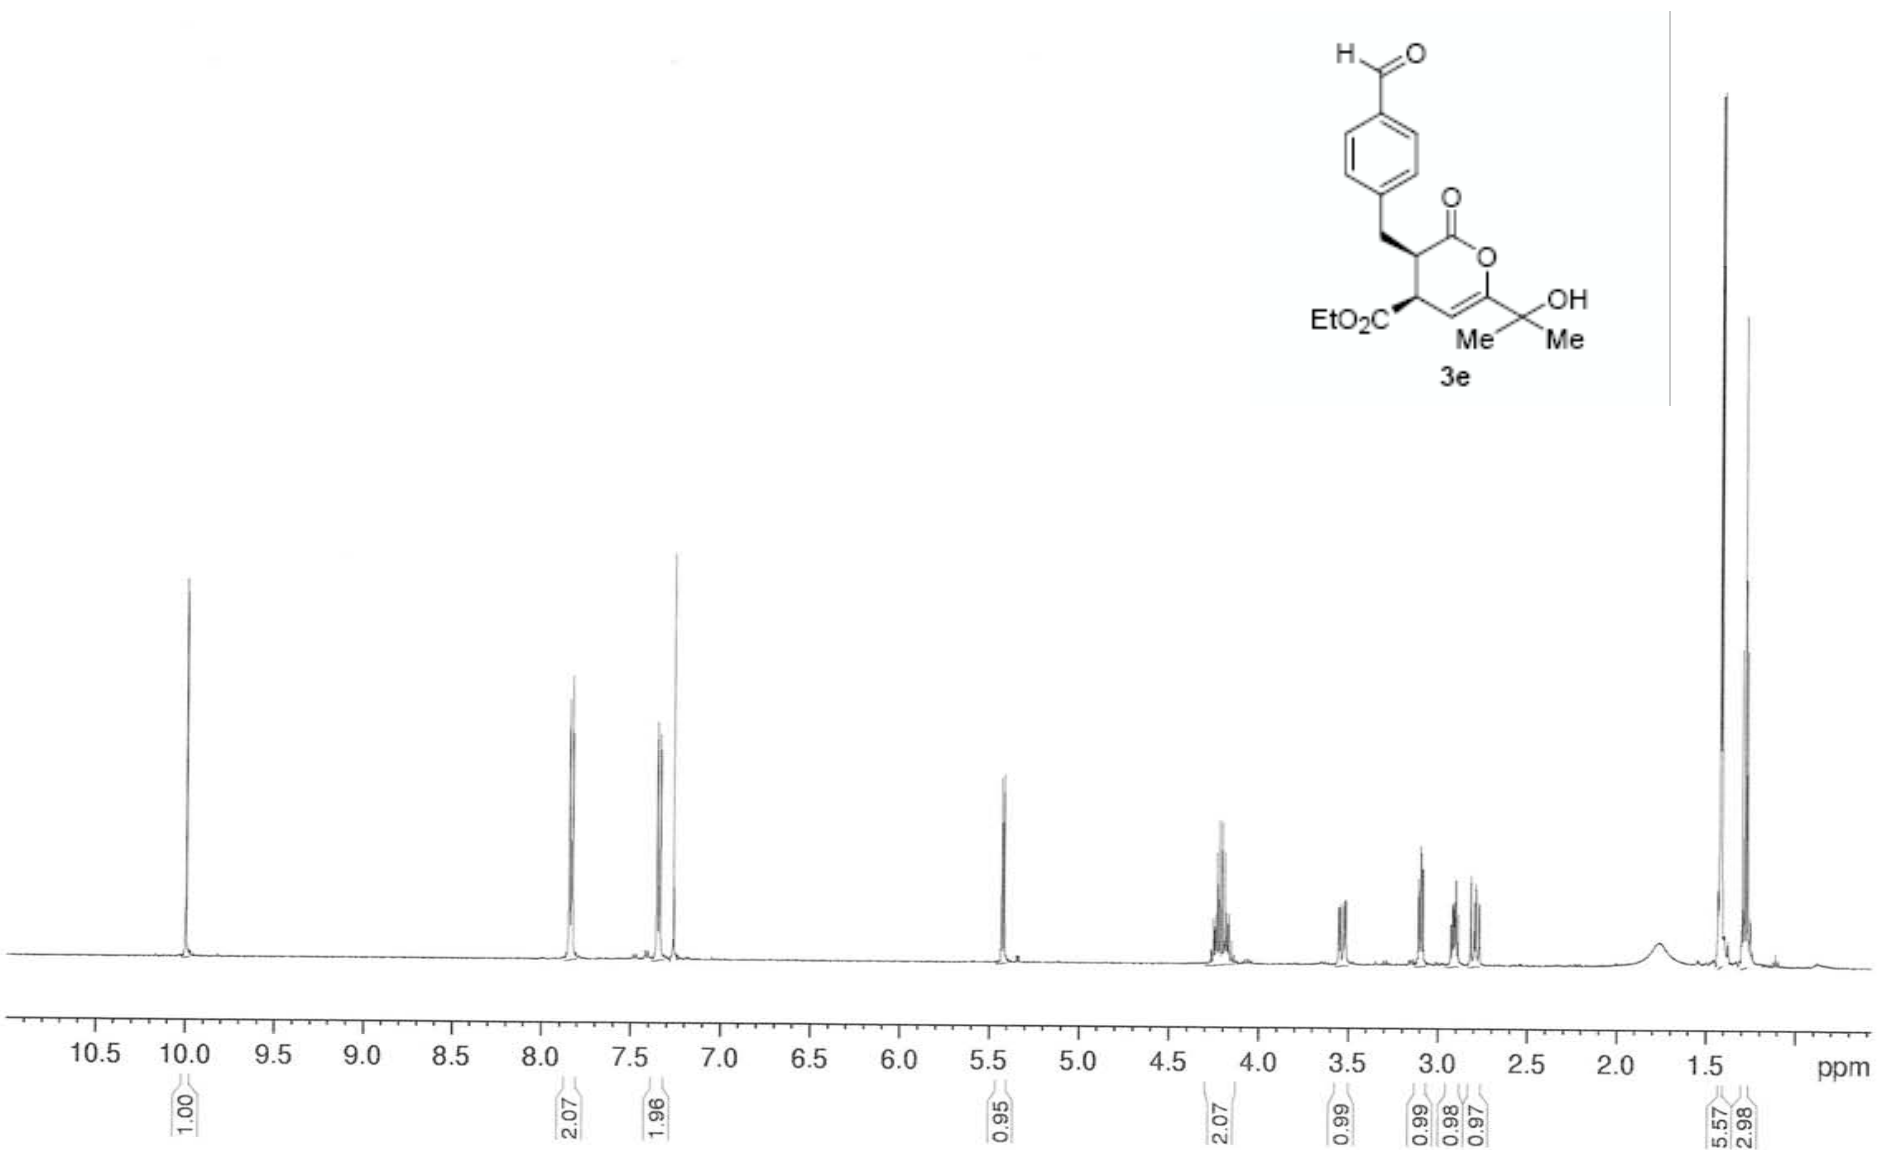

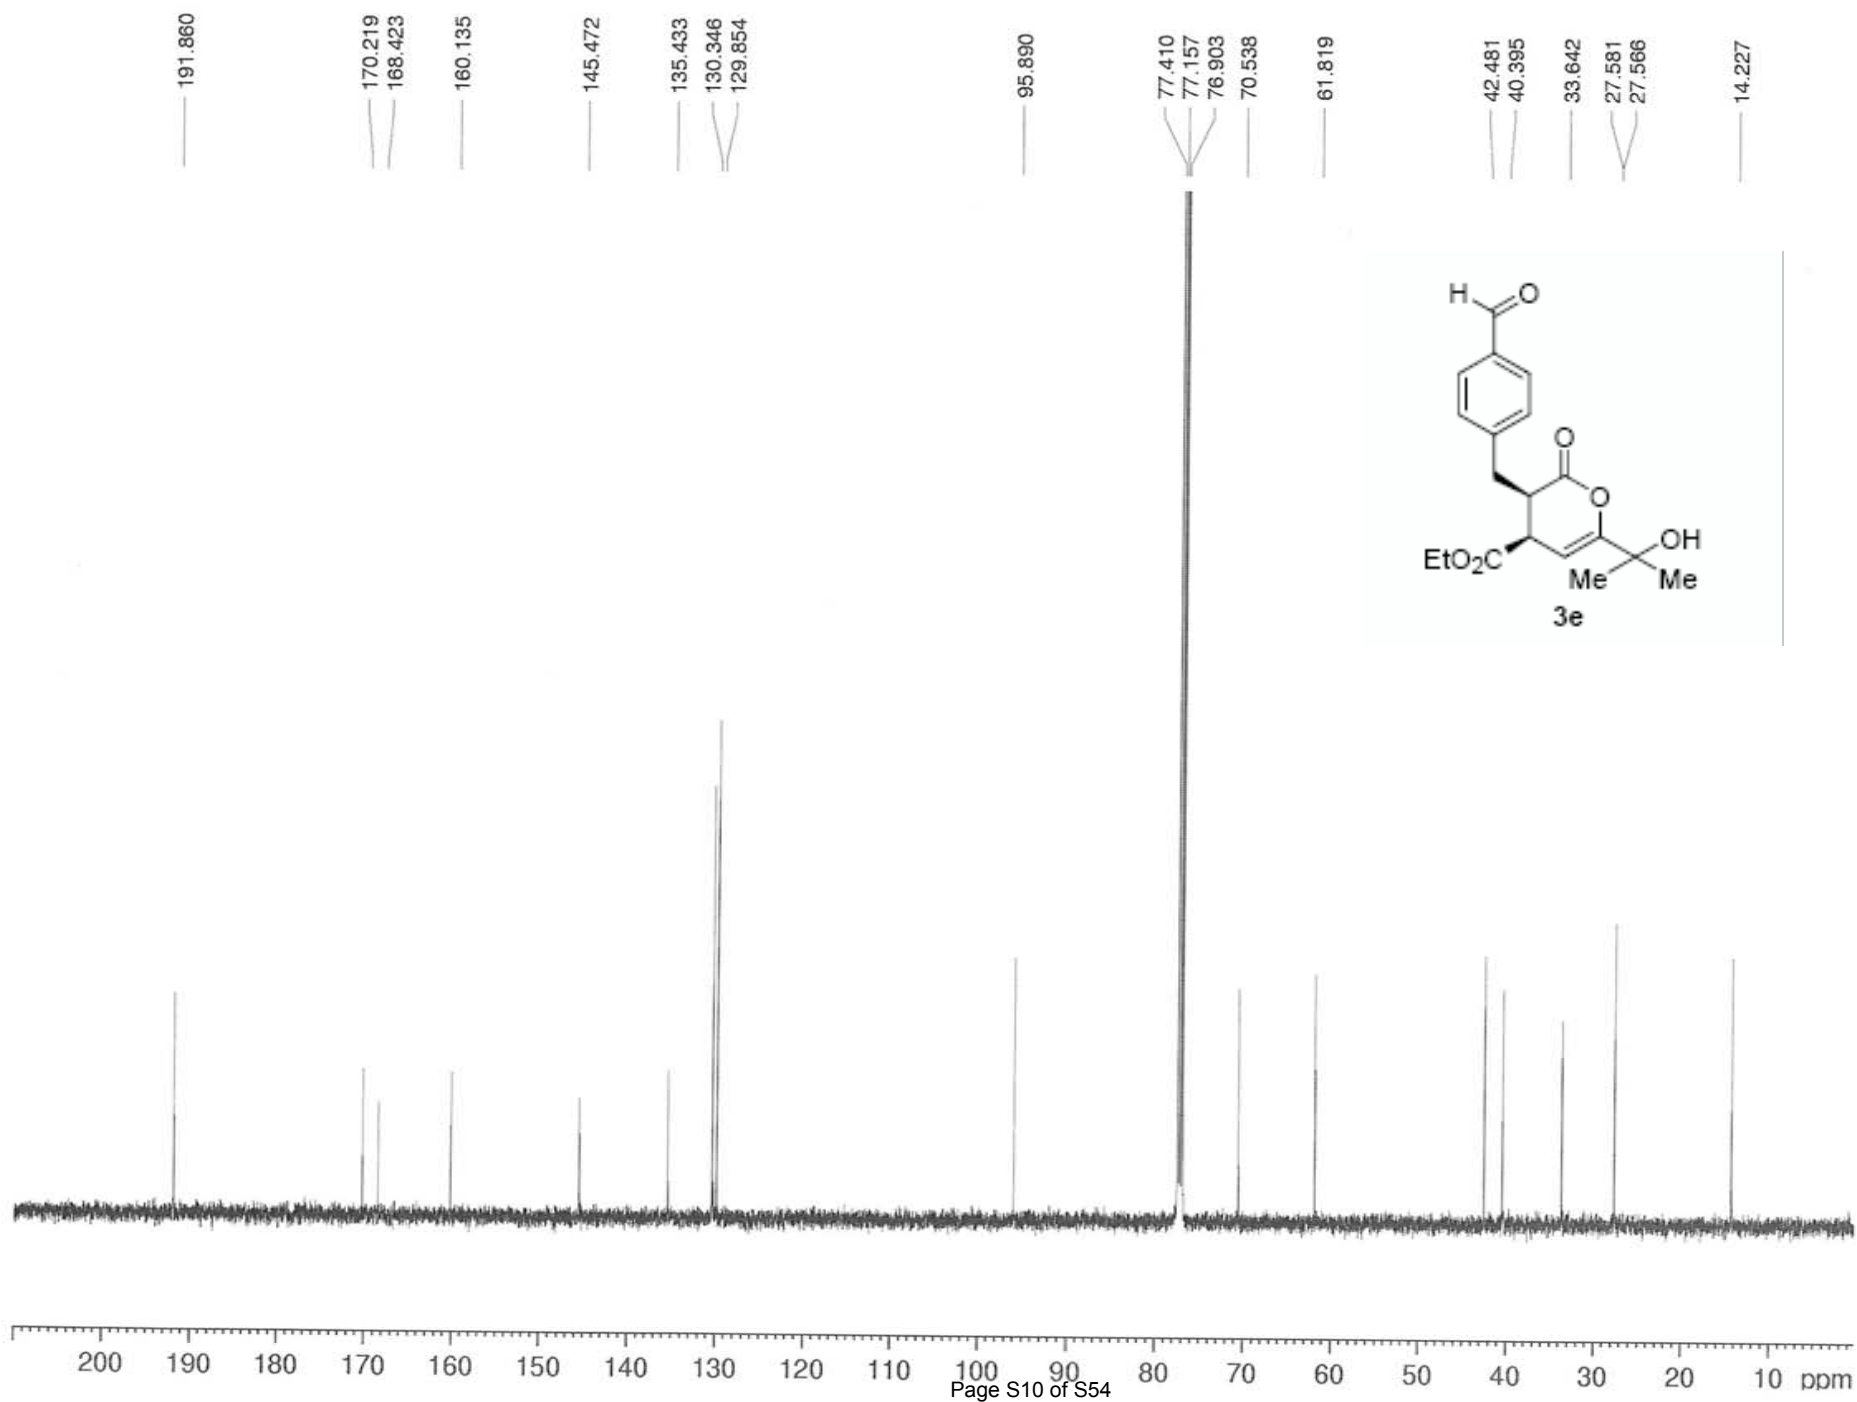

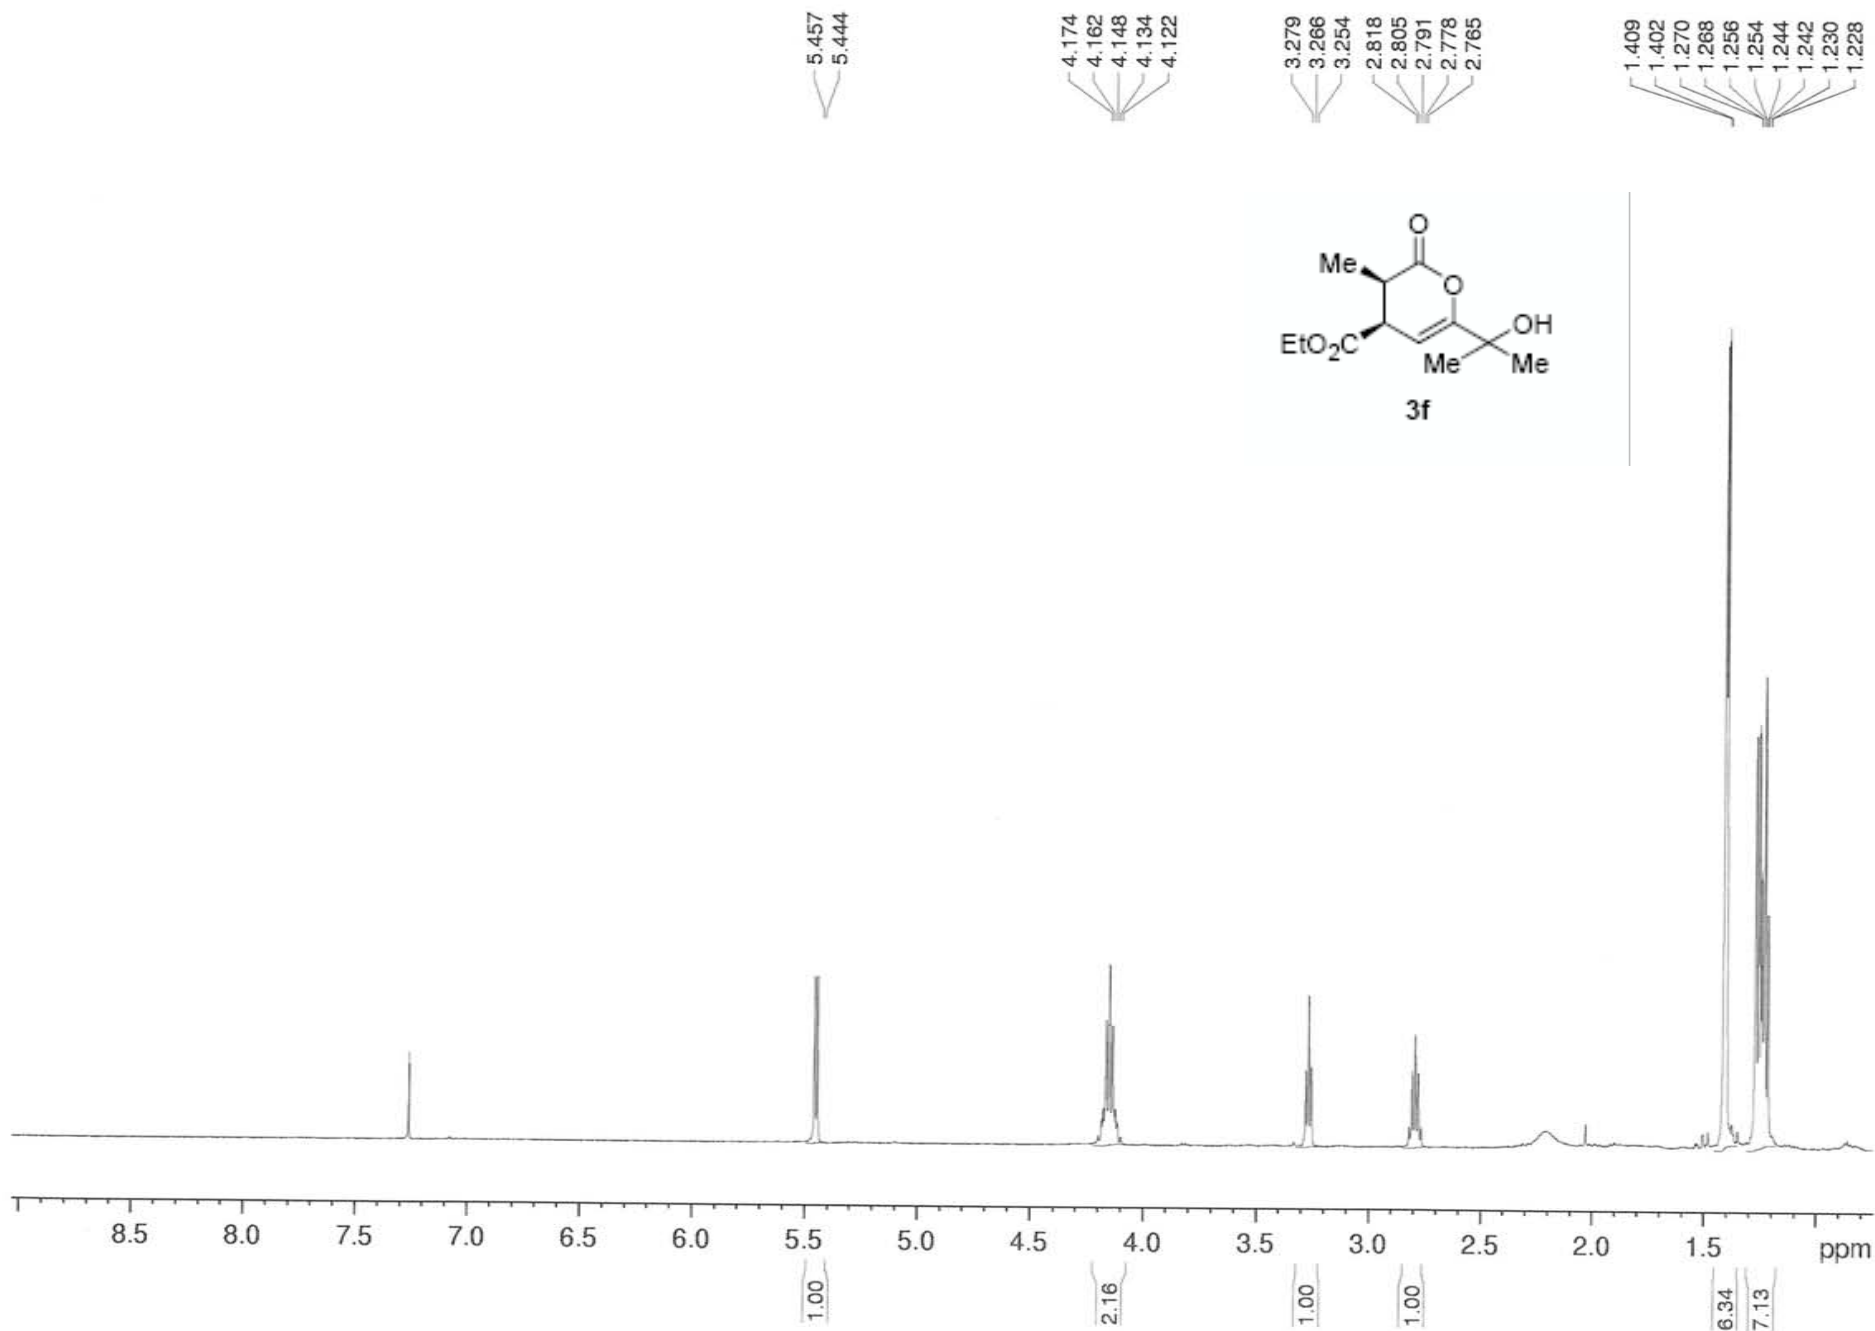

170.552  
170.003

159.875

95.791

77.433  
77.180  
76.926  
70.514

61.580

43.098

35.608

27.544  
27.512

14.155  
12.569

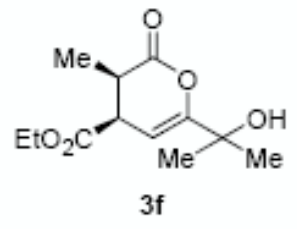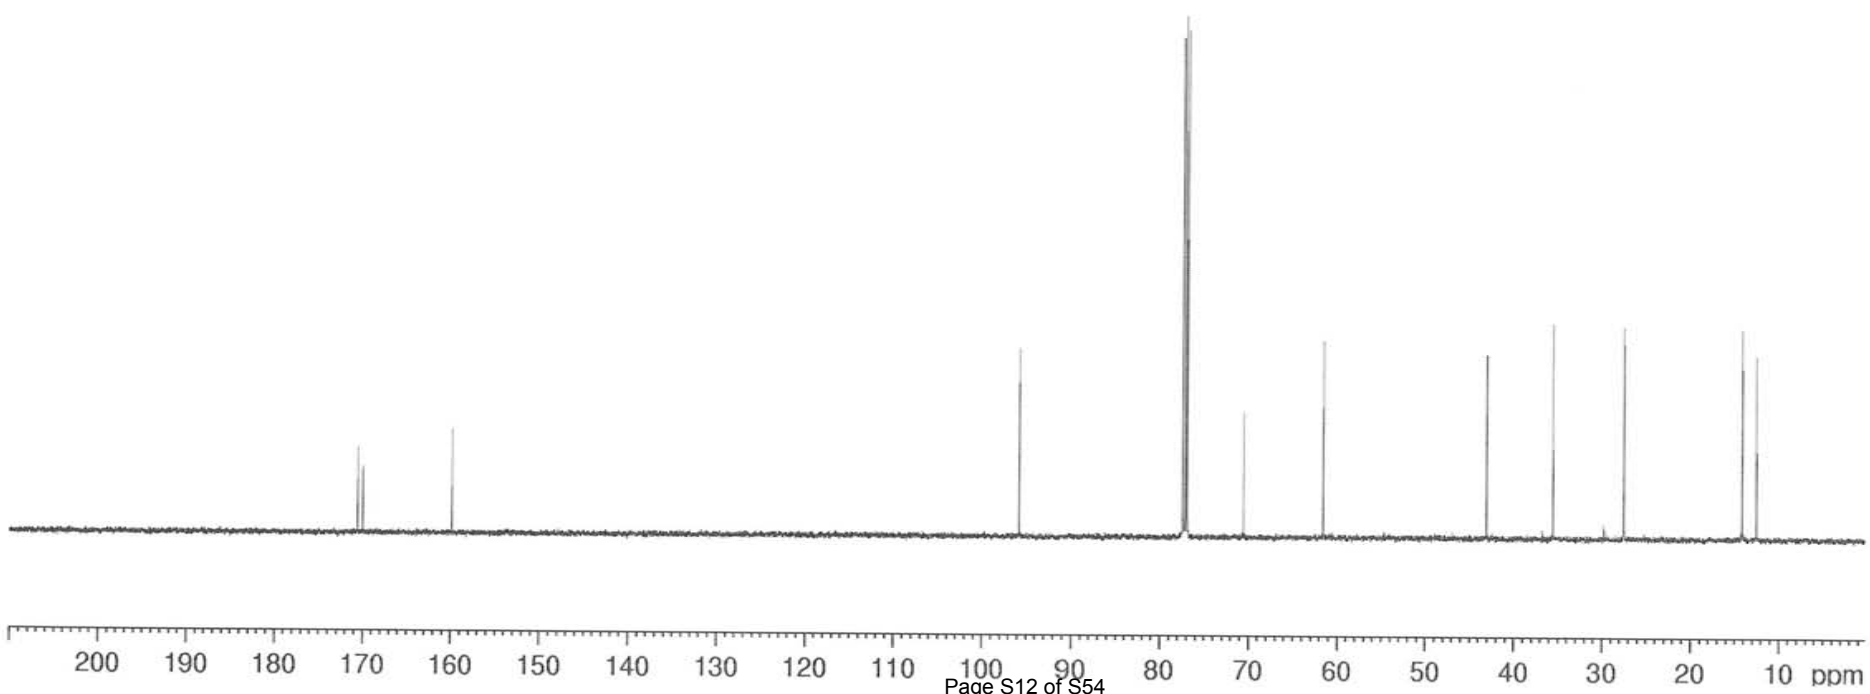

7.342  
7.328  
7.318  
7.308  
7.305  
7.297  
7.282  
7.261  
7.251  
7.237  
7.129  
7.114

5.312  
5.298  
5.027  
4.922  
4.226  
4.218  
4.211  
4.204  
4.190  
4.173  
4.158  
4.151  
4.144  
4.137  
3.459  
3.450  
3.431  
3.421  
3.082  
3.070  
3.057  
2.815  
2.688  
2.667  
2.659  
2.639

1.490  
1.463  
1.278  
1.263  
1.249

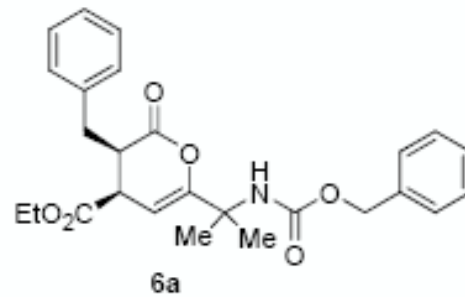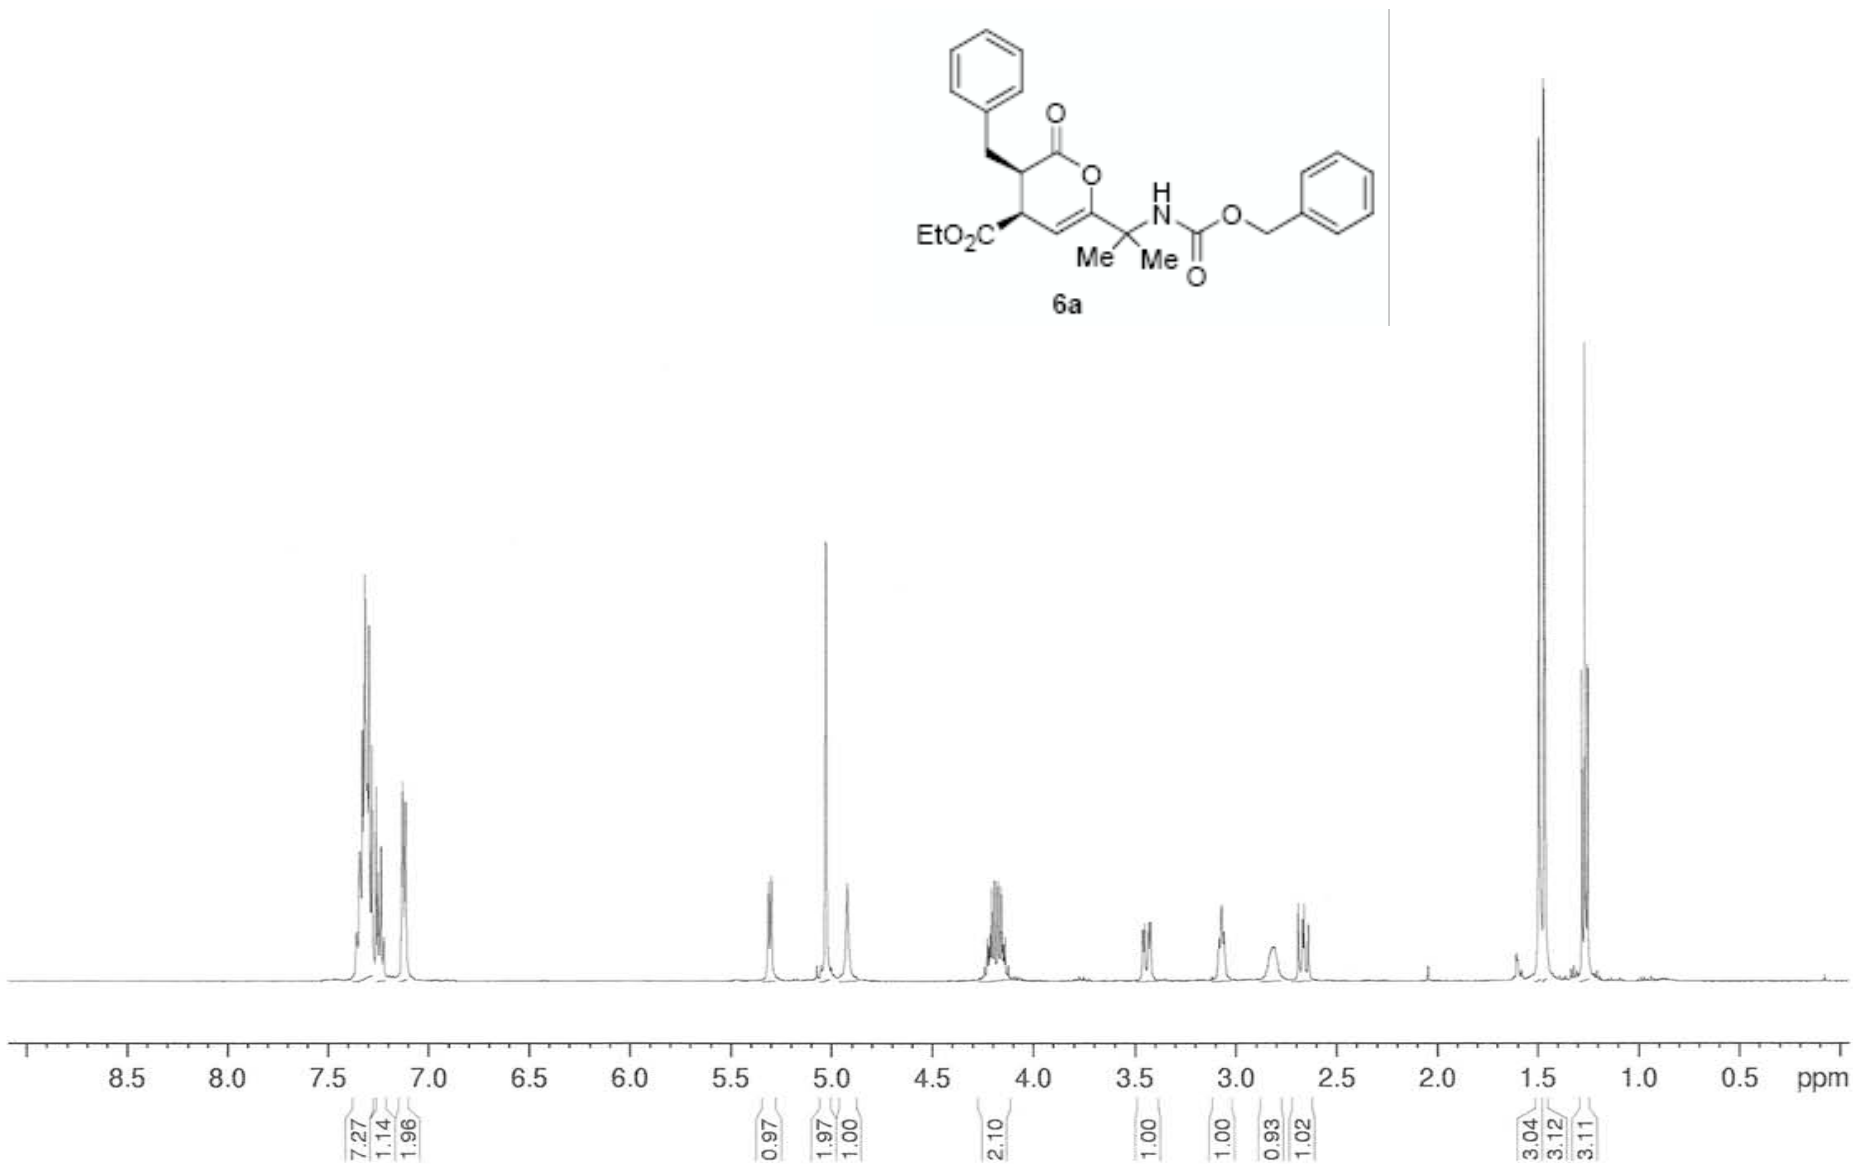

170.407  
169.174

156.960  
154.562

138.038  
136.611  
129.204  
128.831  
128.678  
128.224  
127.998  
126.952

98.087

66.558

61.559

53.583

42.288

40.221

33.252

26.433

25.656

14.214

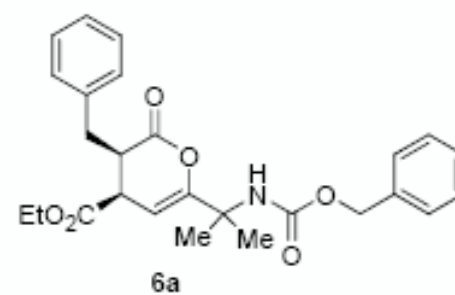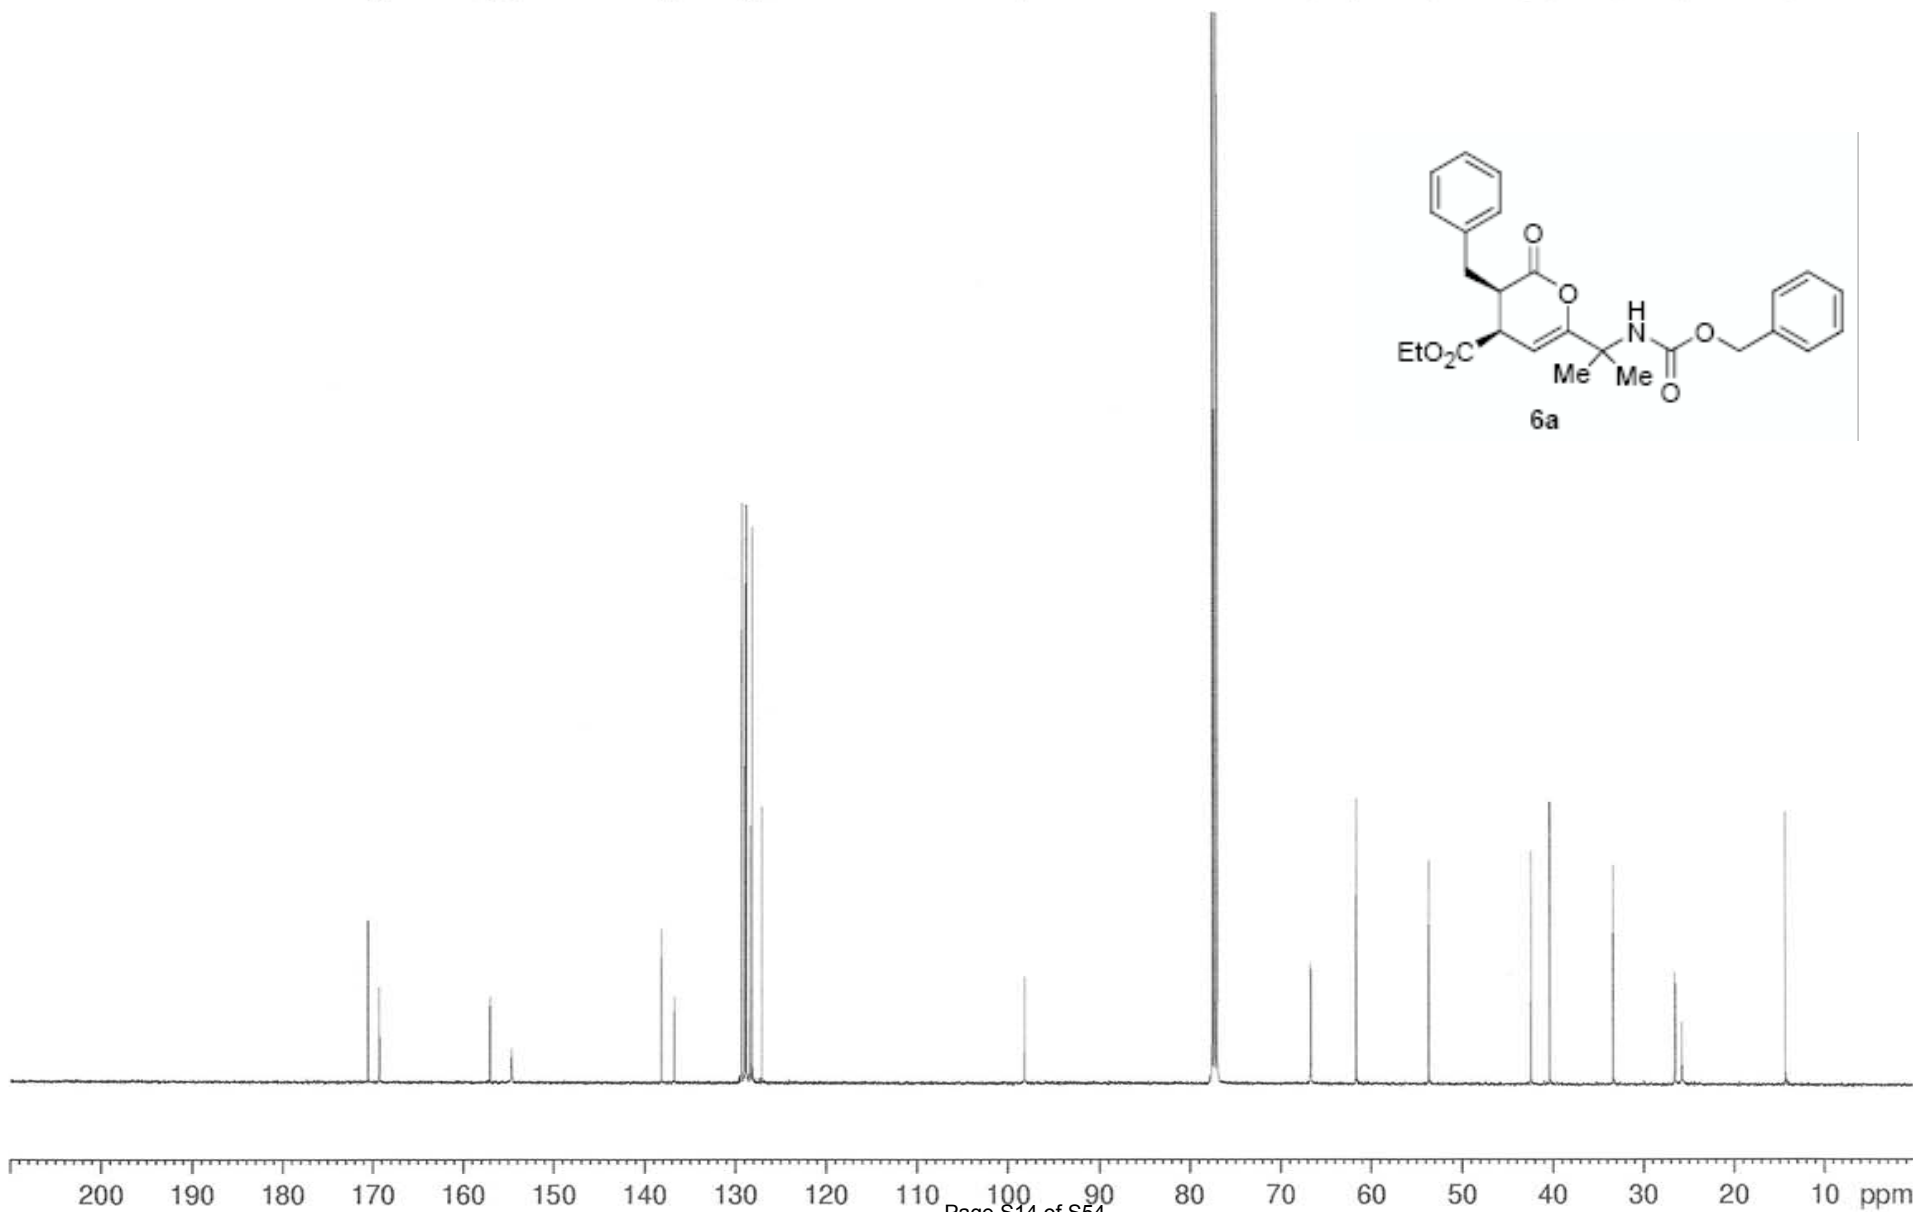

7.419  
7.415  
7.402  
7.349  
7.344  
7.332  
7.320  
7.308  
7.299  
7.294  
7.261  
7.009  
6.993

5.323  
5.309  
5.024  
4.936  
4.210  
4.203  
4.196  
4.189  
4.174  
4.164  
4.150  
4.142  
4.136  
4.128  
4.114  
3.380  
3.370  
3.351  
3.341  
3.076  
3.064  
3.052  
2.779  
2.650  
2.631  
2.622  
2.602

1.488  
1.460  
1.268  
1.254  
1.240

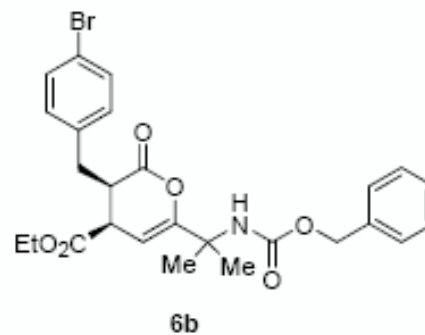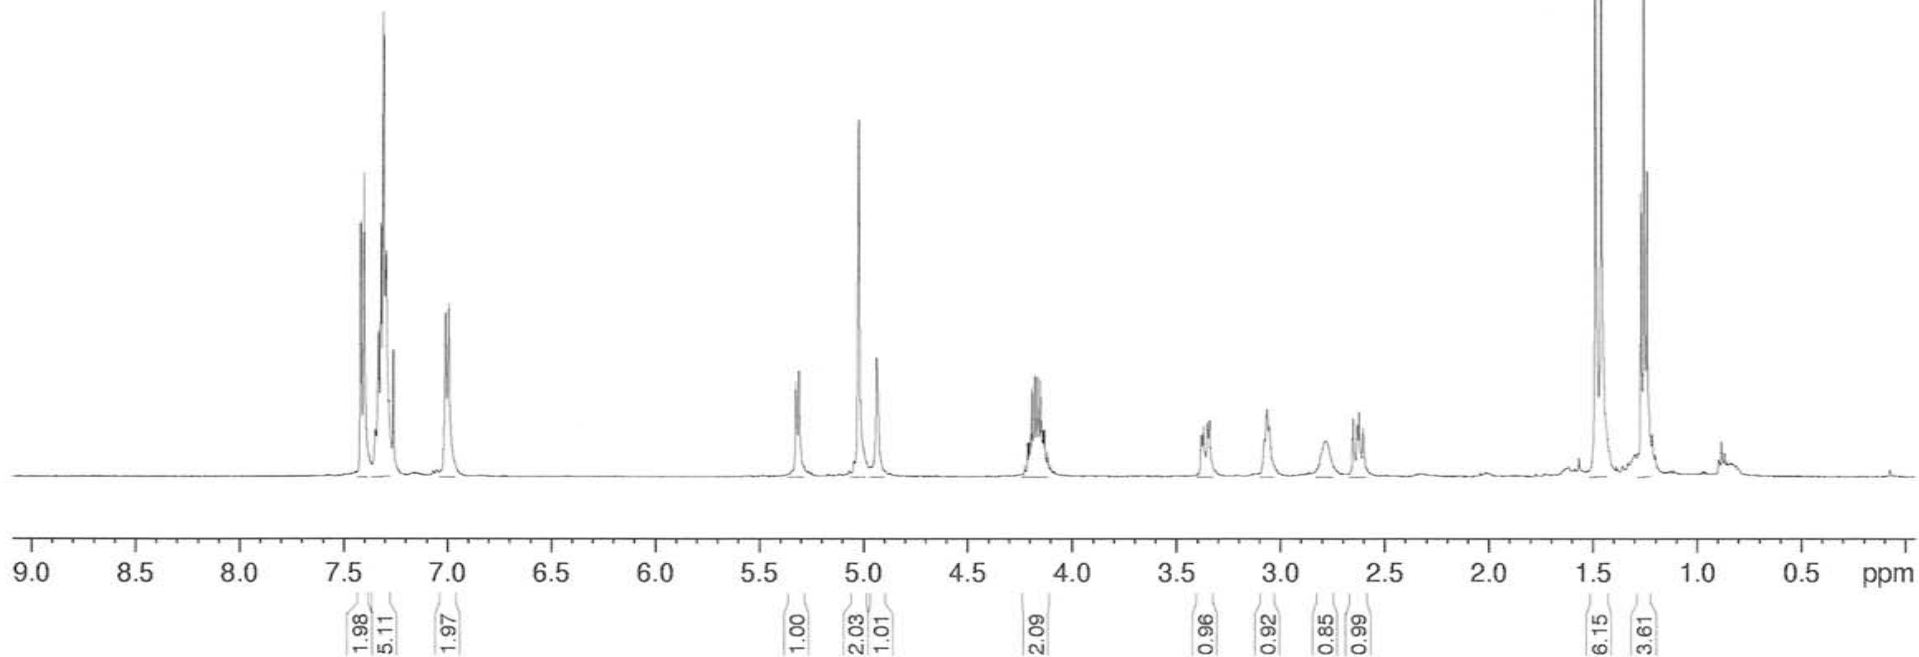

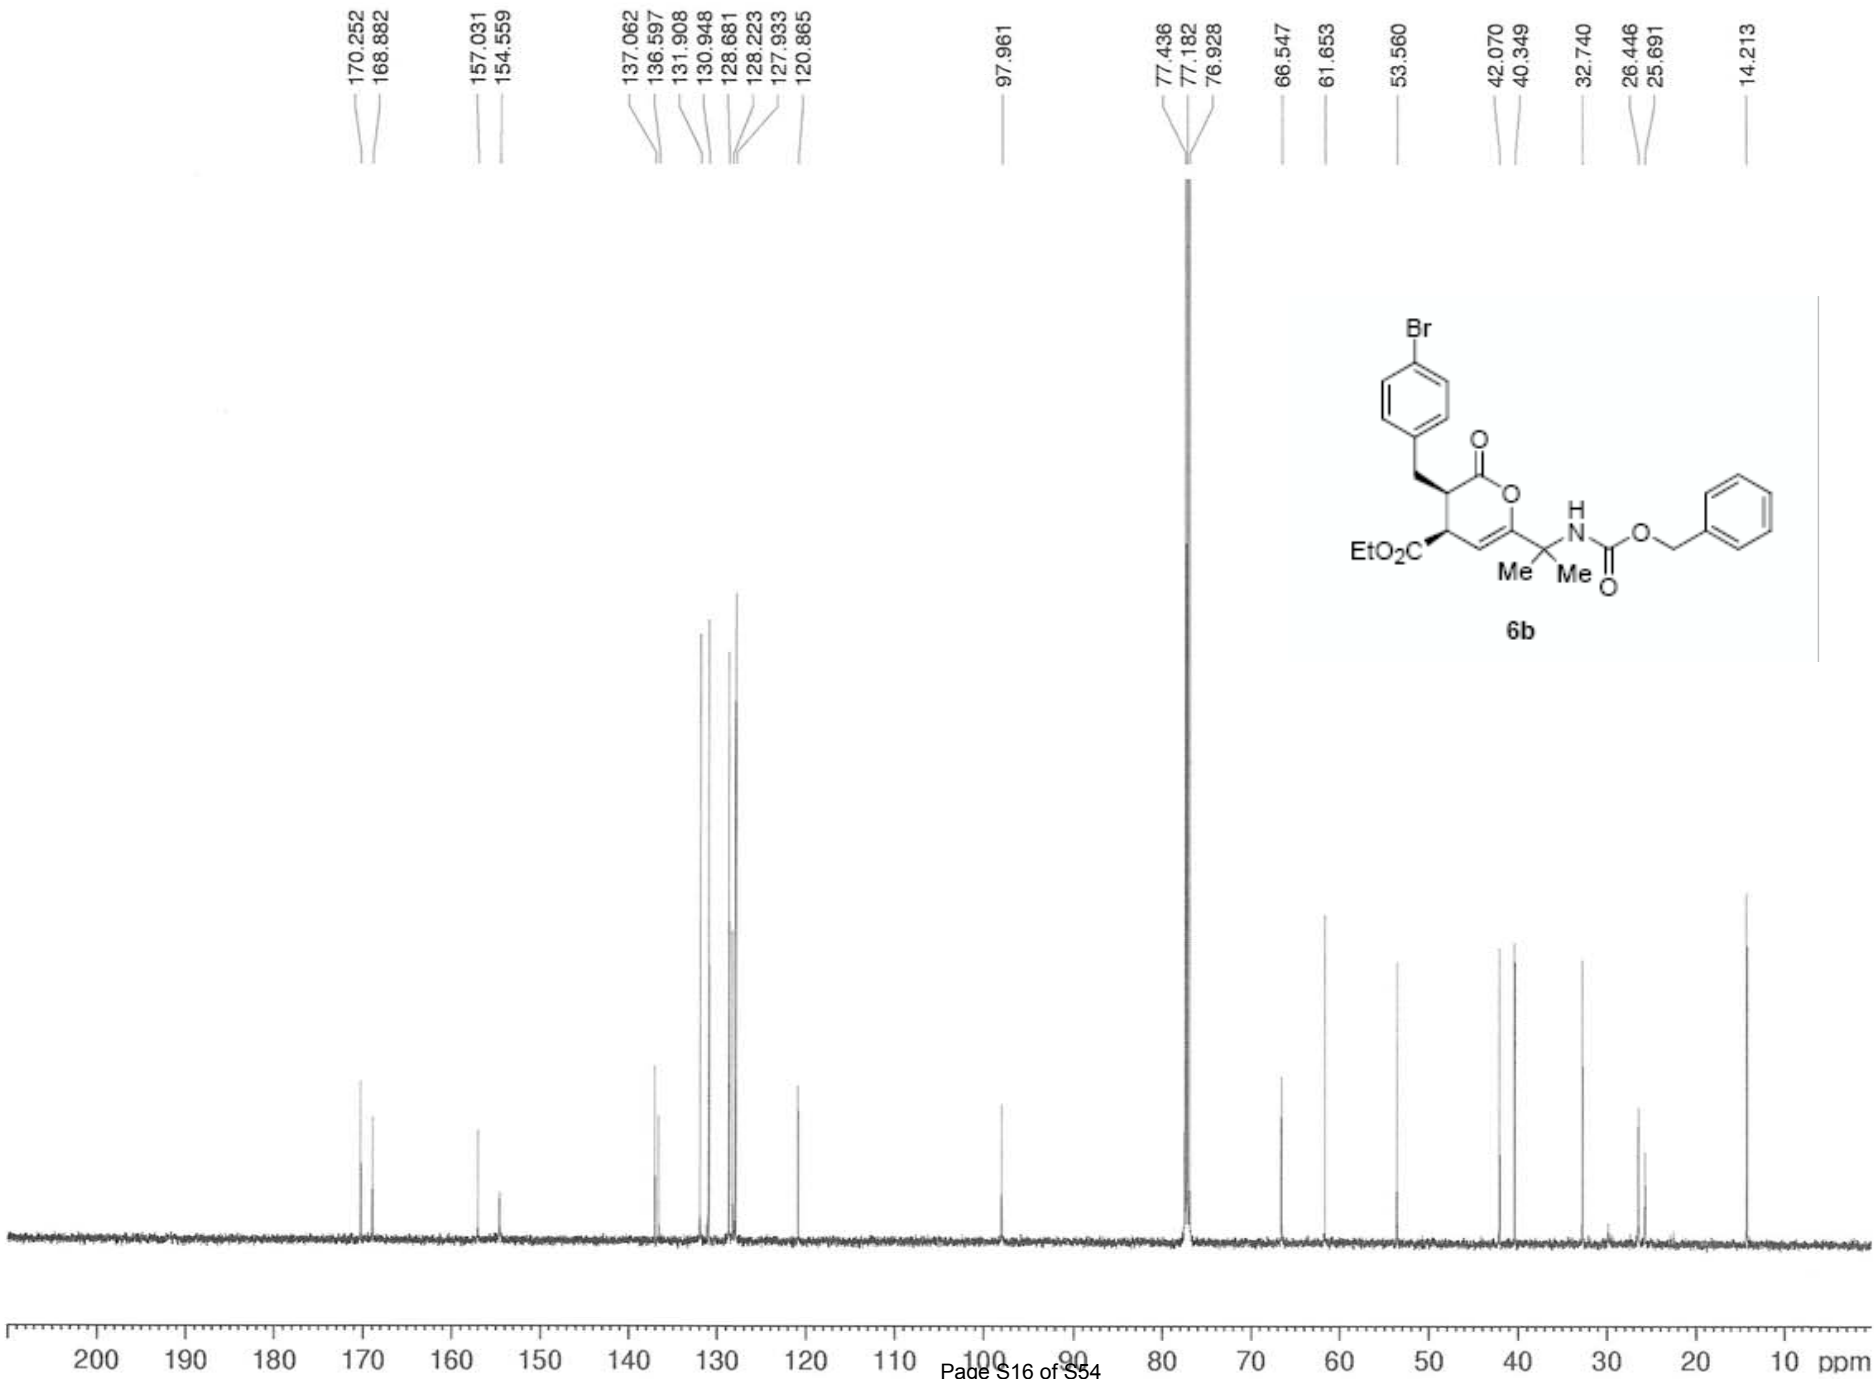



7.356  
7.342  
7.328  
7.317  
7.304  
7.299  
7.290  
7.285  
7.261  
7.042  
7.026  
6.836  
6.819

5.315  
5.301  
5.027  
4.919  
4.218  
4.211  
4.204  
4.197  
4.183  
4.168  
4.154  
4.146  
4.140  
4.132  
3.790  
3.758  
3.385  
3.376  
3.356  
3.347  
3.093  
3.081  
3.068  
2.774  
2.633  
2.612  
2.604  
2.584  
2.043

1.489  
1.463  
1.274  
1.260  
1.253  
1.246  
1.238  
1.214  
1.202

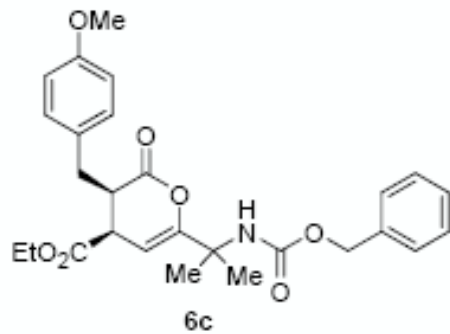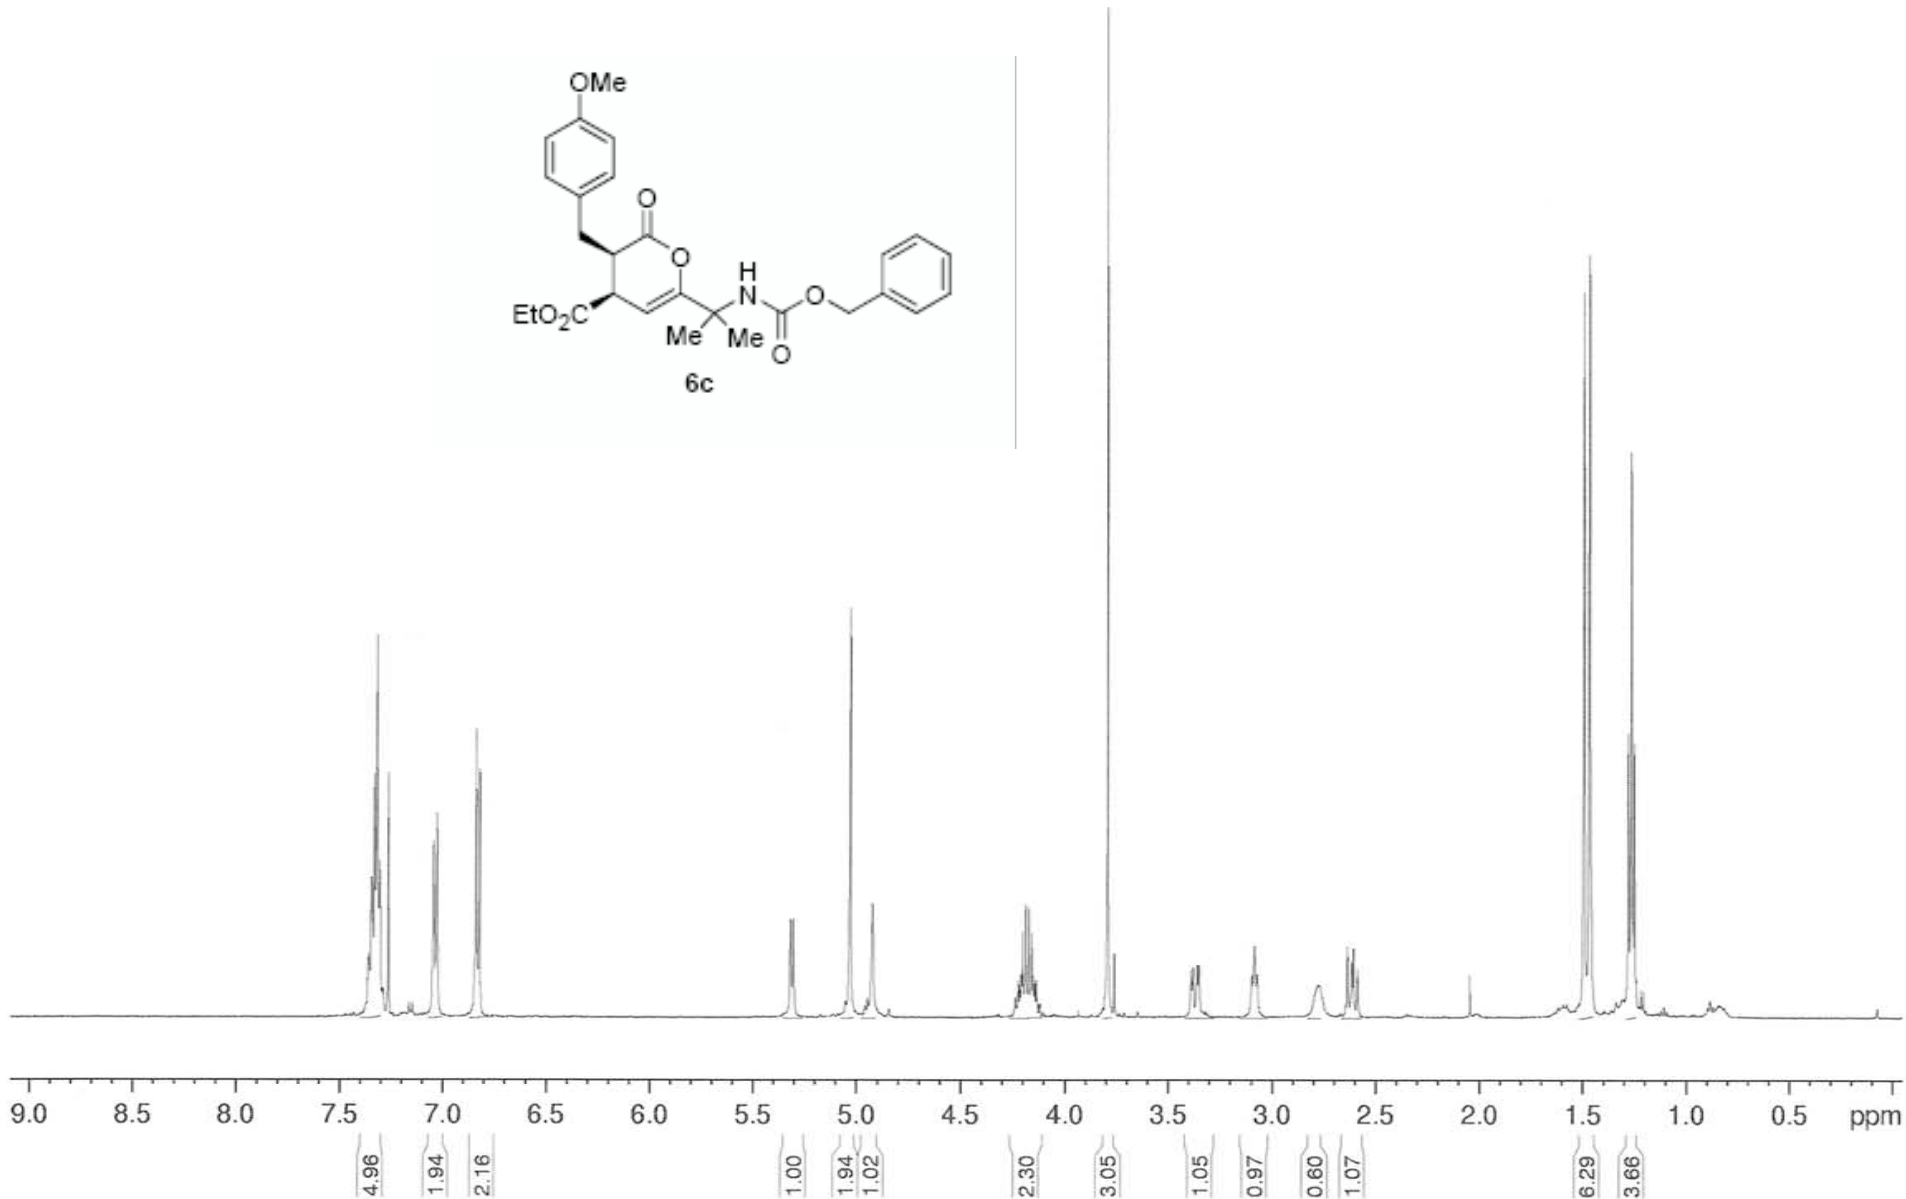

170.443  
169.255

158.598  
156.918  
154.554

136.611  
130.184  
129.927  
128.748  
128.678  
128.216  
128.121  
127.989  
114.226

98.085

77.426  
76.919

66.545

61.538

55.416  
53.580

42.439  
40.213

32.351

26.427  
25.660

14.223

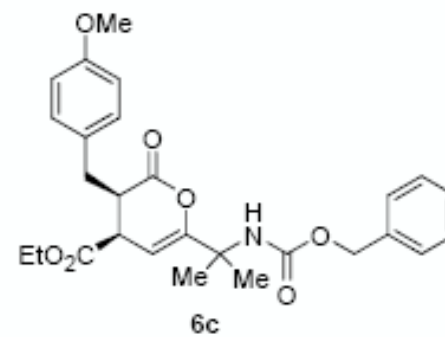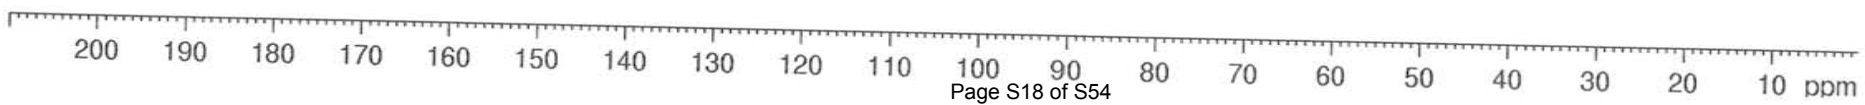

7.362  
7.358  
7.348  
7.345  
7.334  
7.321  
7.308  
7.304  
7.260

6.292  
6.288  
6.286  
6.282  
6.052  
6.046

5.354  
5.340  
5.025  
4.900  
4.209  
4.202  
4.194  
4.187  
4.180  
4.173  
4.165  
4.159  
4.151  
4.144  
4.137  
4.130  
4.122  
4.115  
3.425  
3.416  
3.394  
3.385  
3.162  
3.150  
3.138  
2.941  
2.843  
2.822  
2.812  
2.792

1.500  
1.455  
1.258  
1.244  
1.230

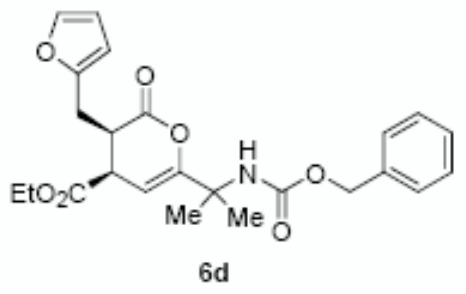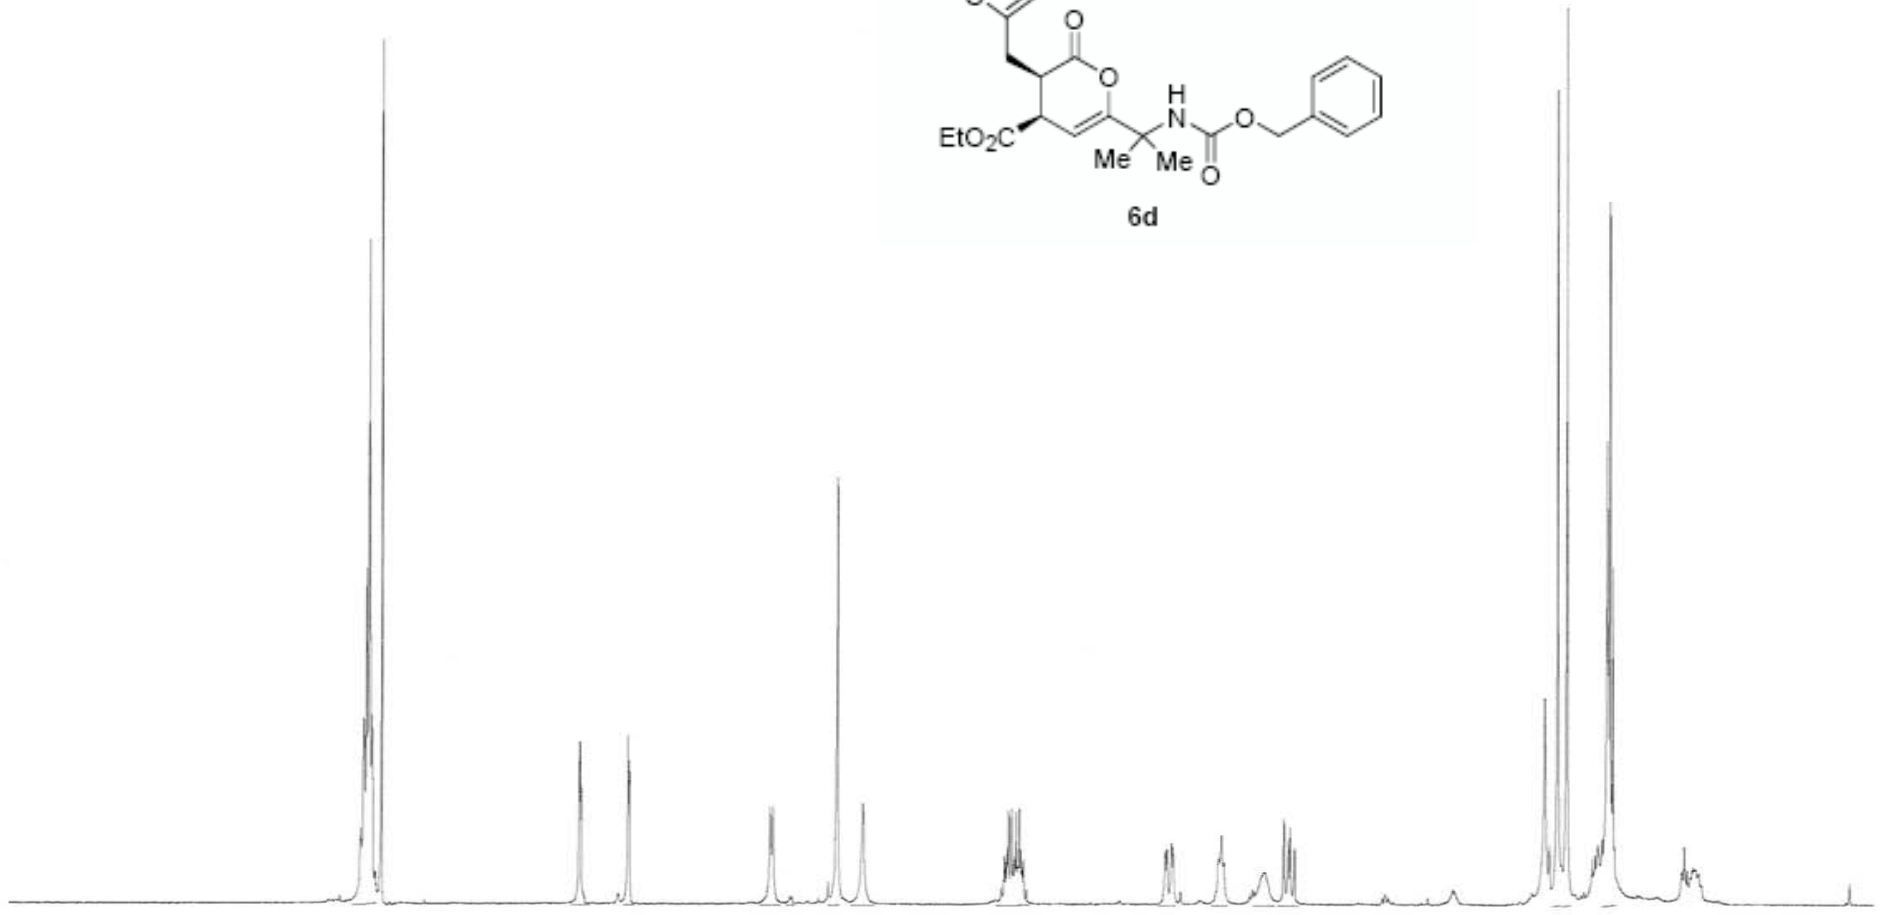

8.5 8.0 7.5 7.0 6.5 6.0 5.5 5.0 4.5 4.0 3.5 3.0 2.5 2.0 1.5 1.0 0.5 ppm

5.82

0.93

0.84

1.00

0.07

1.80

0.93

2.02

0.87

0.90

0.82

0.94

2.75

2.95

4.38

170.219  
168.764

156.952  
154.573  
151.725

141.946  
136.565

128.678  
128.253  
128.090

110.529  
107.661

98.096

77.424  
77.171  
76.916

66.591

61.546

53.582

40.408  
39.696

26.481  
25.820  
25.584

14.185

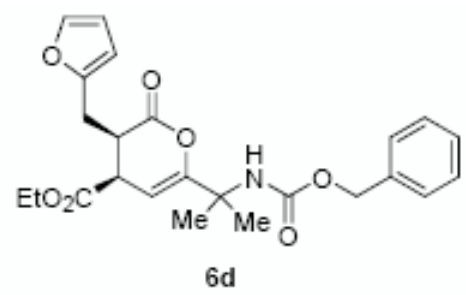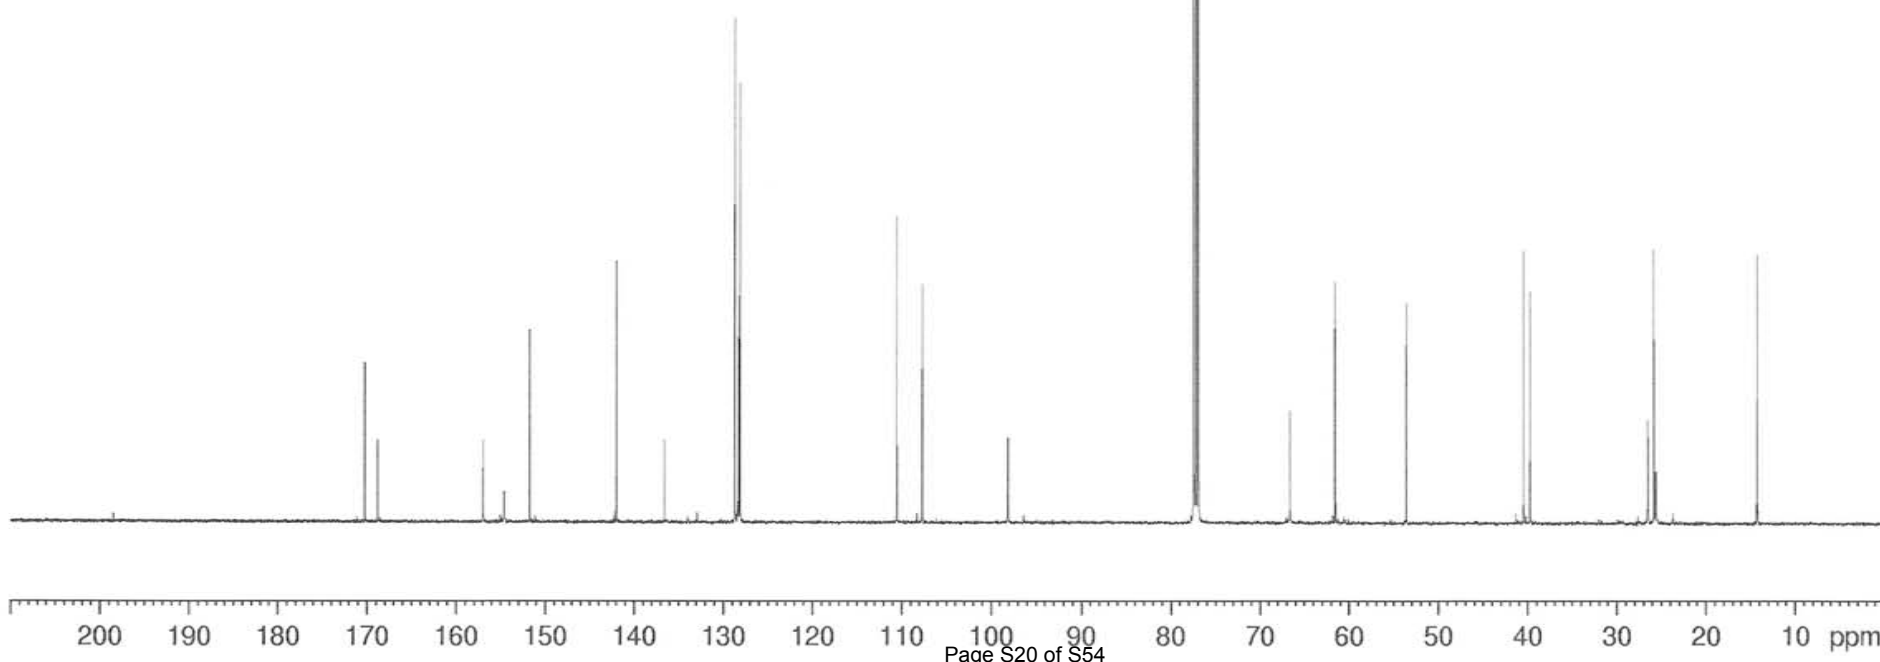

IV142

7.358  
7.344  
7.330  
7.316  
7.311  
7.303  
7.295  
7.260

5.380  
5.367

5.024  
4.925

4.175  
4.168  
4.161  
4.154  
4.140  
4.130  
4.115  
4.108  
4.101  
4.094

3.336

2.555

1.964

1.510  
1.468  
1.332  
1.233  
1.219  
1.205  
0.909  
0.896  
0.882

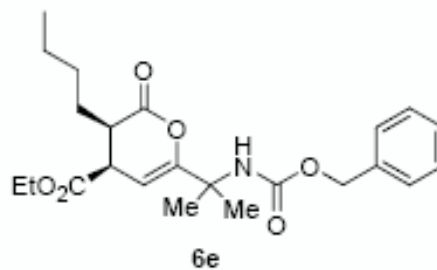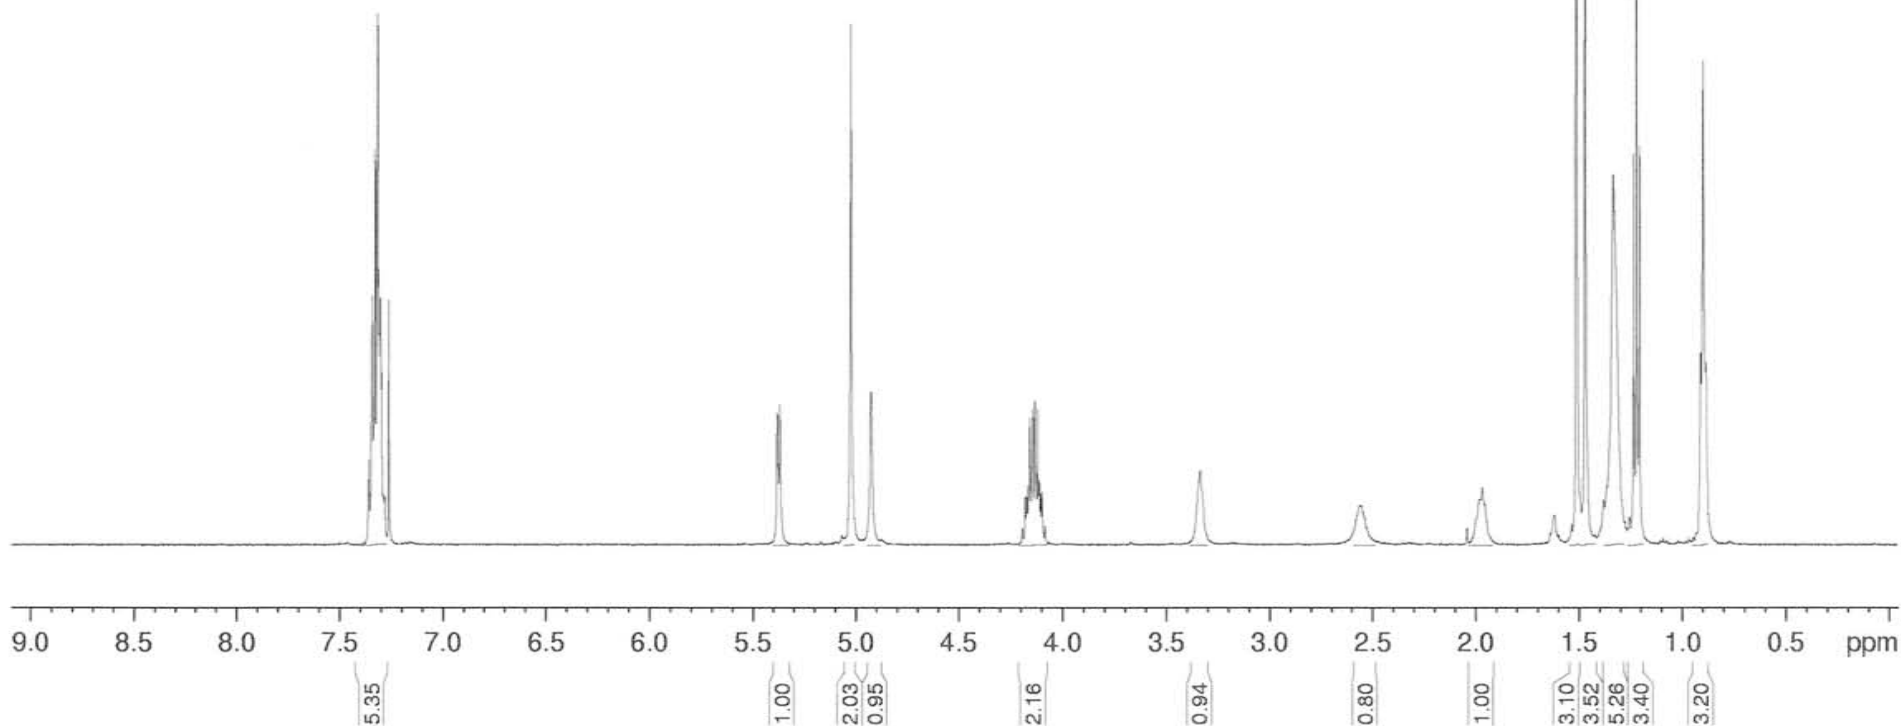

170.524  
169.732

156.724

136.596  
128.663  
128.381  
128.281  
128.208  
128.000

97.839

77.455  
77.201  
76.947

66.522

61.468

53.583

41.363  
40.308

29.326  
26.760  
26.385  
25.686

22.651  
14.149  
13.977

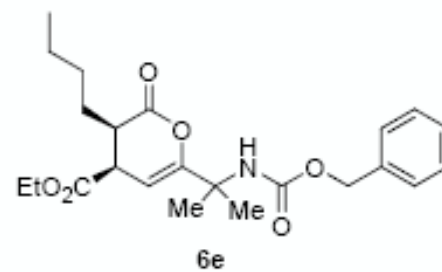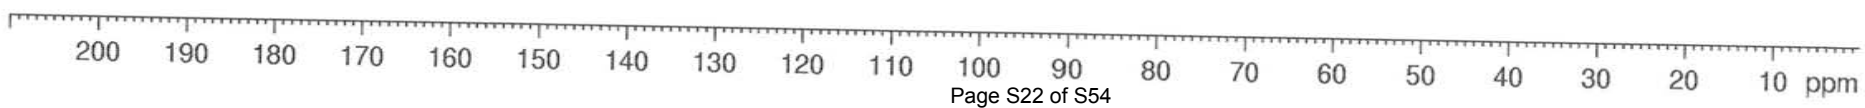

7.555  
7.551  
7.542  
7.537  
7.336  
7.322  
7.307  
7.266  
7.260  
7.252  
7.178  
7.175  
7.161  
6.891  
6.887  
6.877  
6.873

5.669  
5.655

3.823  
3.750  
3.560  
3.551  
3.532  
3.522  
3.276  
3.264  
3.262  
3.250  
3.012  
3.003  
3.001  
2.992  
2.982  
2.981  
2.971  
2.775  
2.754  
2.746  
2.726

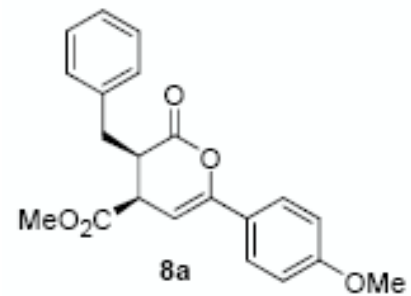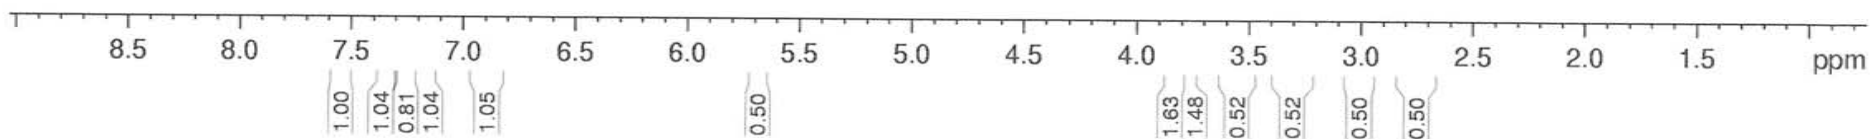

170.970  
168.991

160.832

152.446

138.235

129.129

128.927

126.989

126.467

124.398

114.044

96.099

77.420

77.166

76.912

55.495

52.636

42.882

40.574

33.422

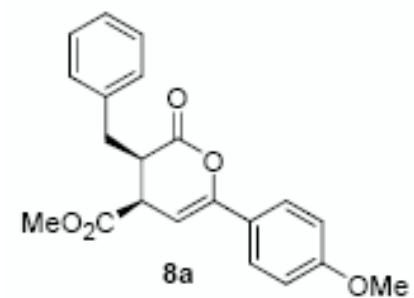

200 190 180 170 160 150 140 130 120 110 100 90 80 70 60 50 40 30 20 10 ppm



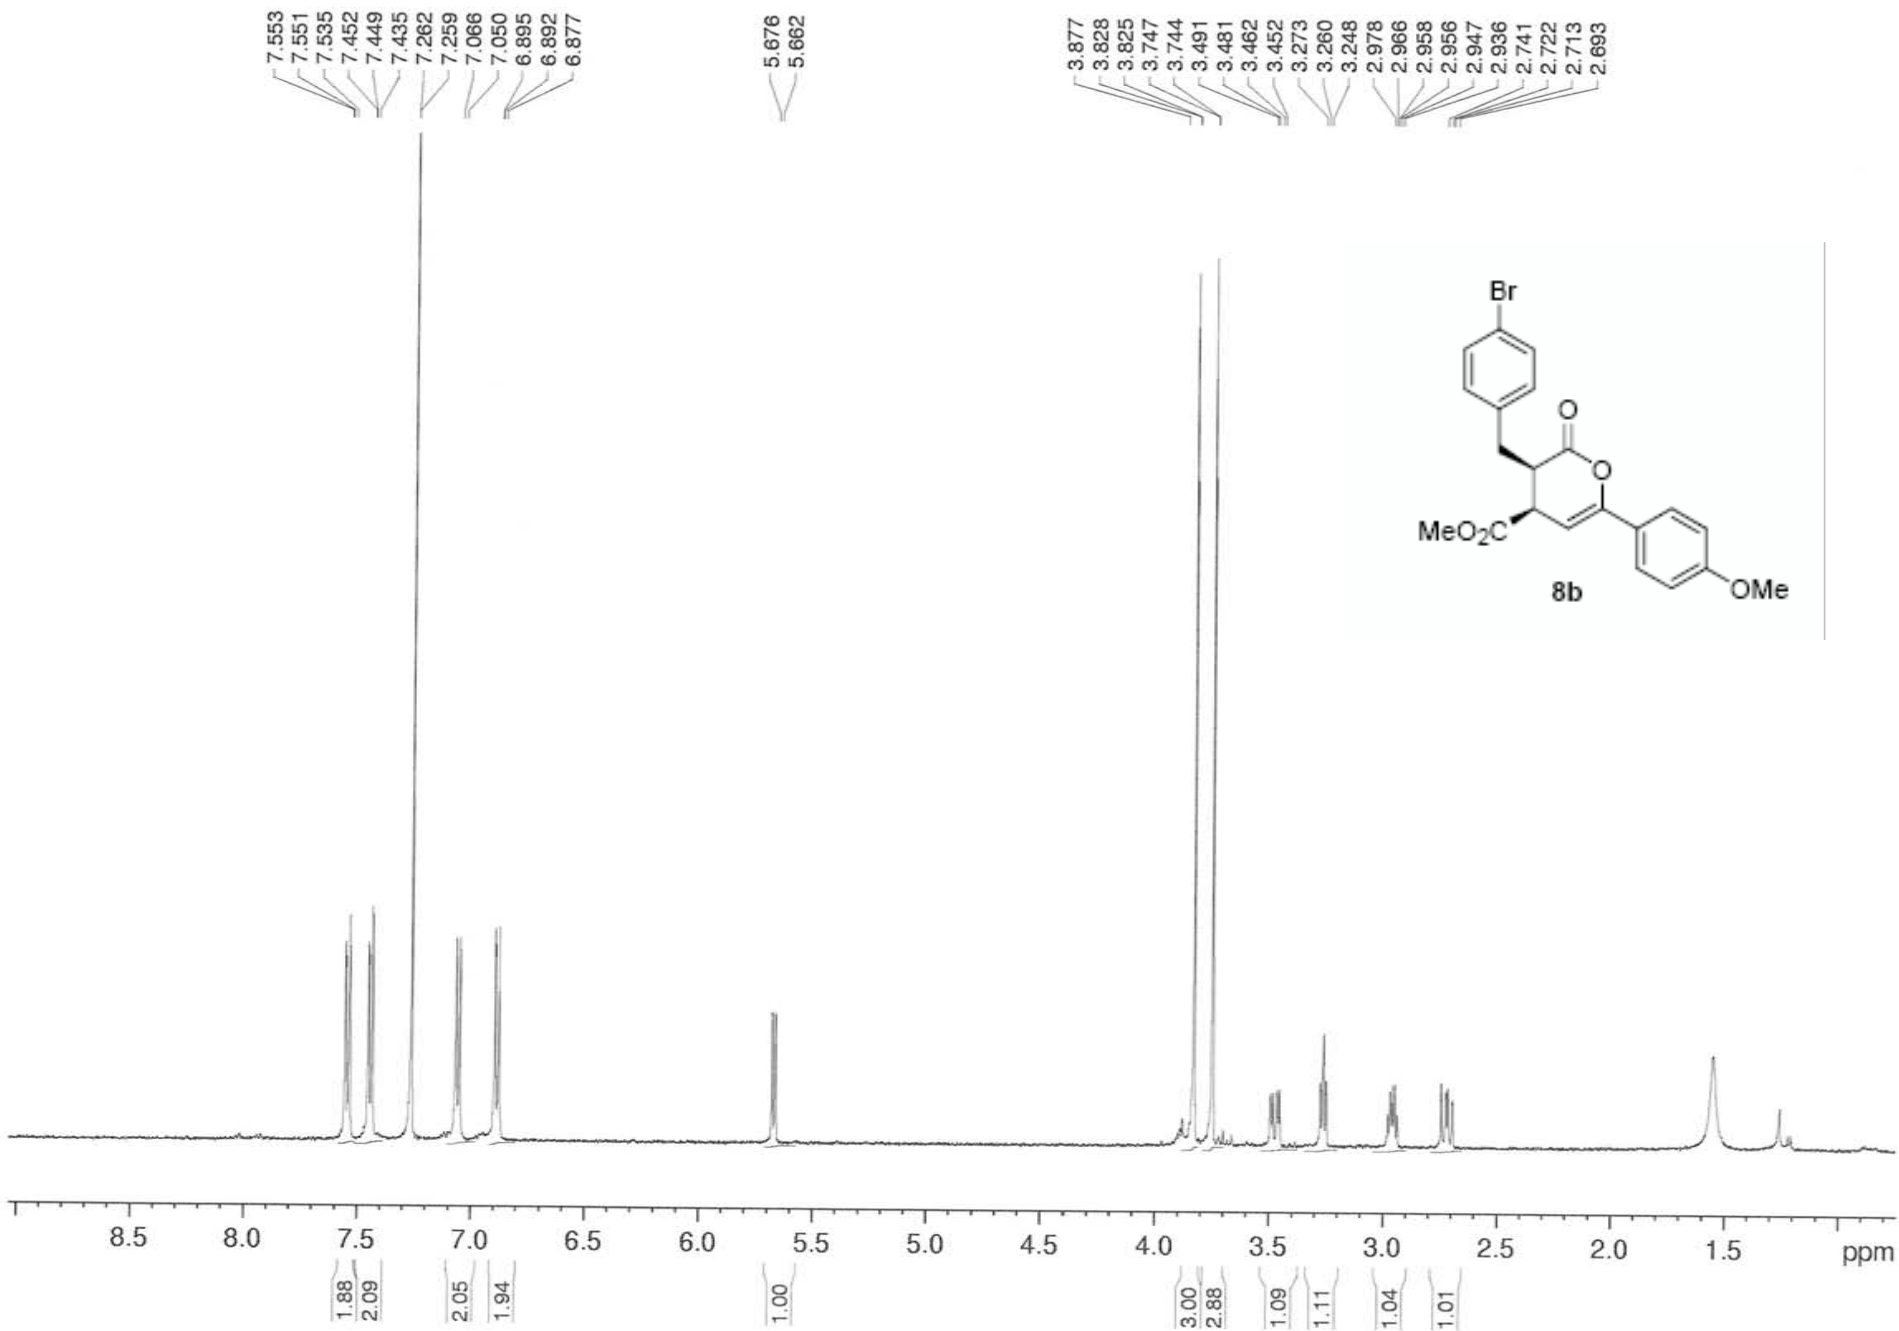

170.820  
168.684

160.893

152.513

137.239

132.019

130.869

126.475

124.273

120.919

114.069

95.891

77.408

77.153

76.900

55.501

52.700

42.696

40.703

32.942

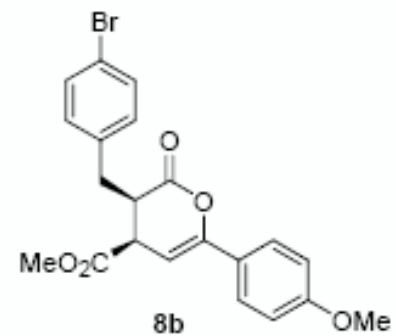

200 190 180 170 160 150 140 130 120 110 100 90 80 70 60 50 40 30 20 10 ppm

7.583  
7.579  
7.565

7.261

6.903  
6.900  
6.886

5.740  
5.727

3.832  
3.726

3.464  
3.452  
3.439

2.947  
2.934  
2.921  
2.907  
2.894

1.556  
1.339  
1.325

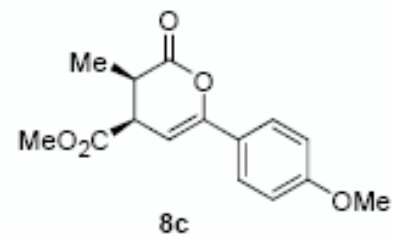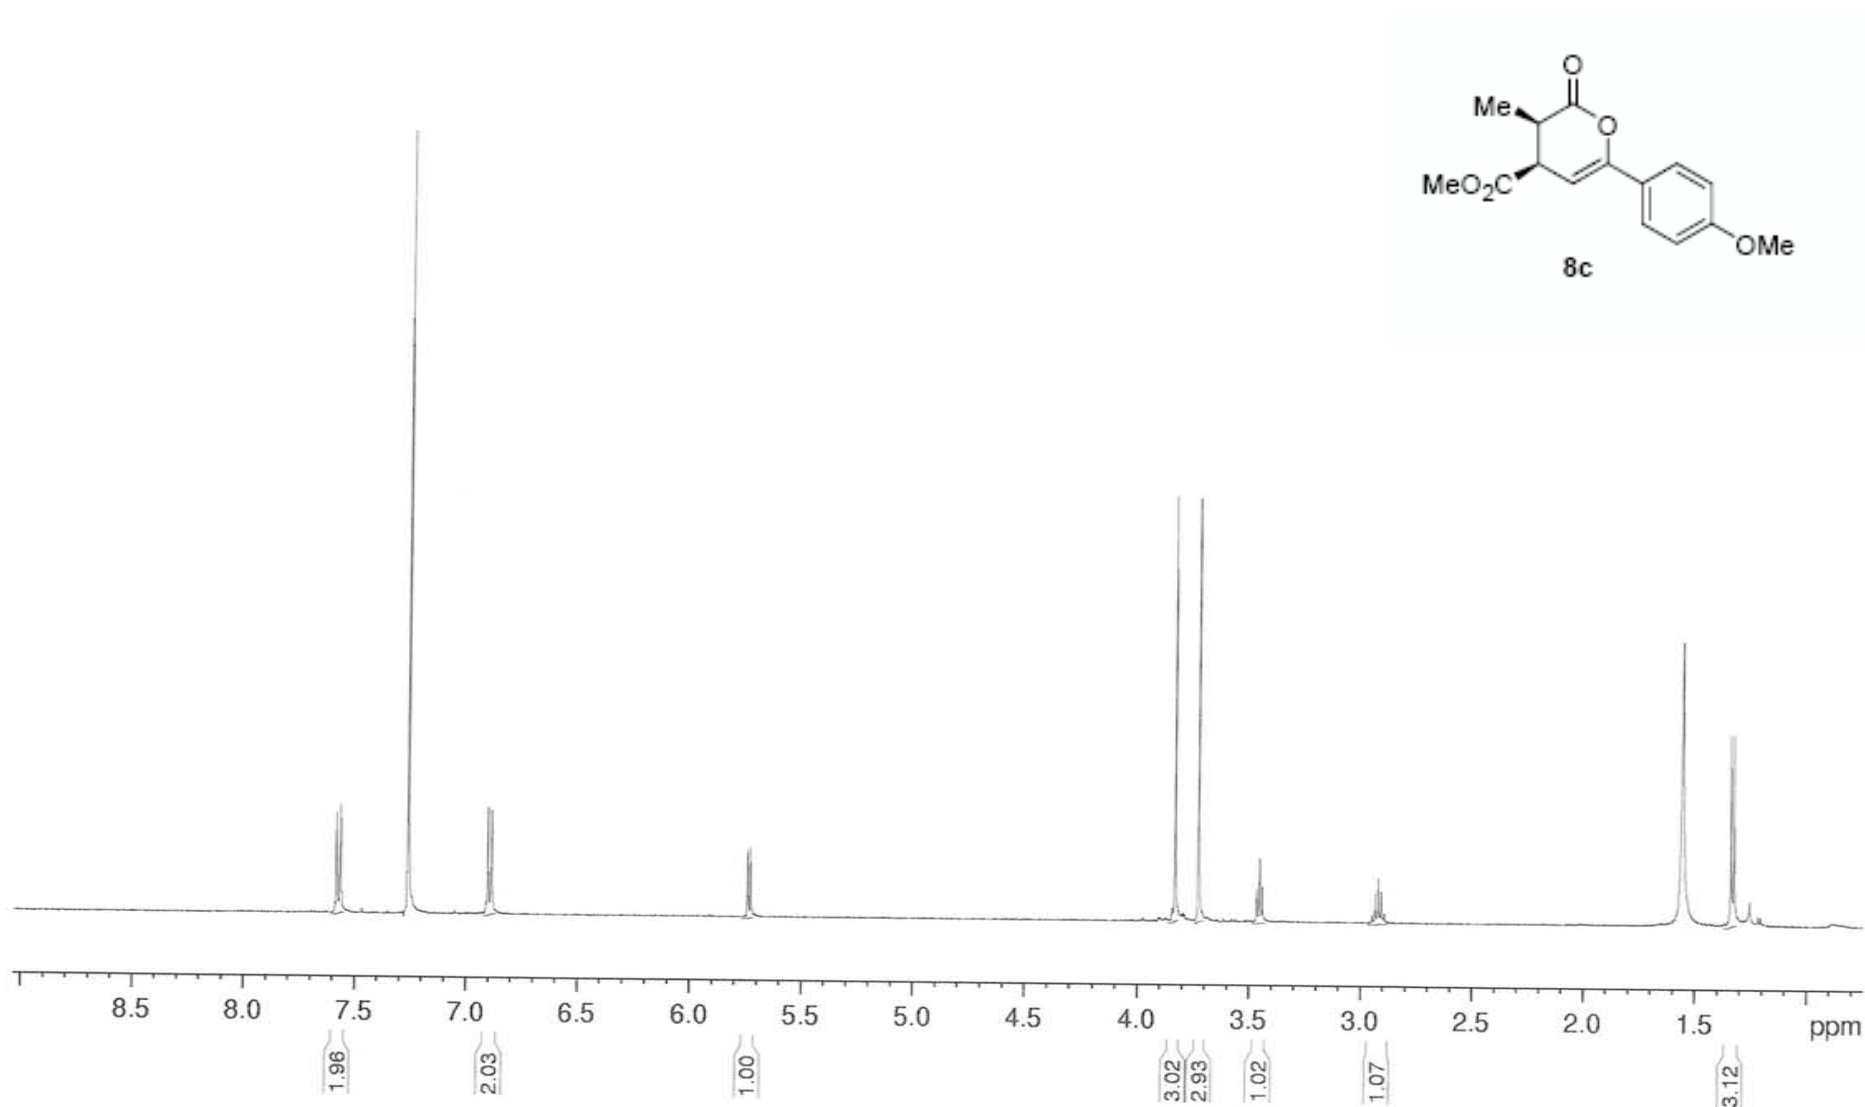

171.059  
169.989

160.784

152.342

126.453  
124.526

114.029

95.892

77.443  
77.189  
76.935

55.496  
52.567

43.644

35.694

12.724

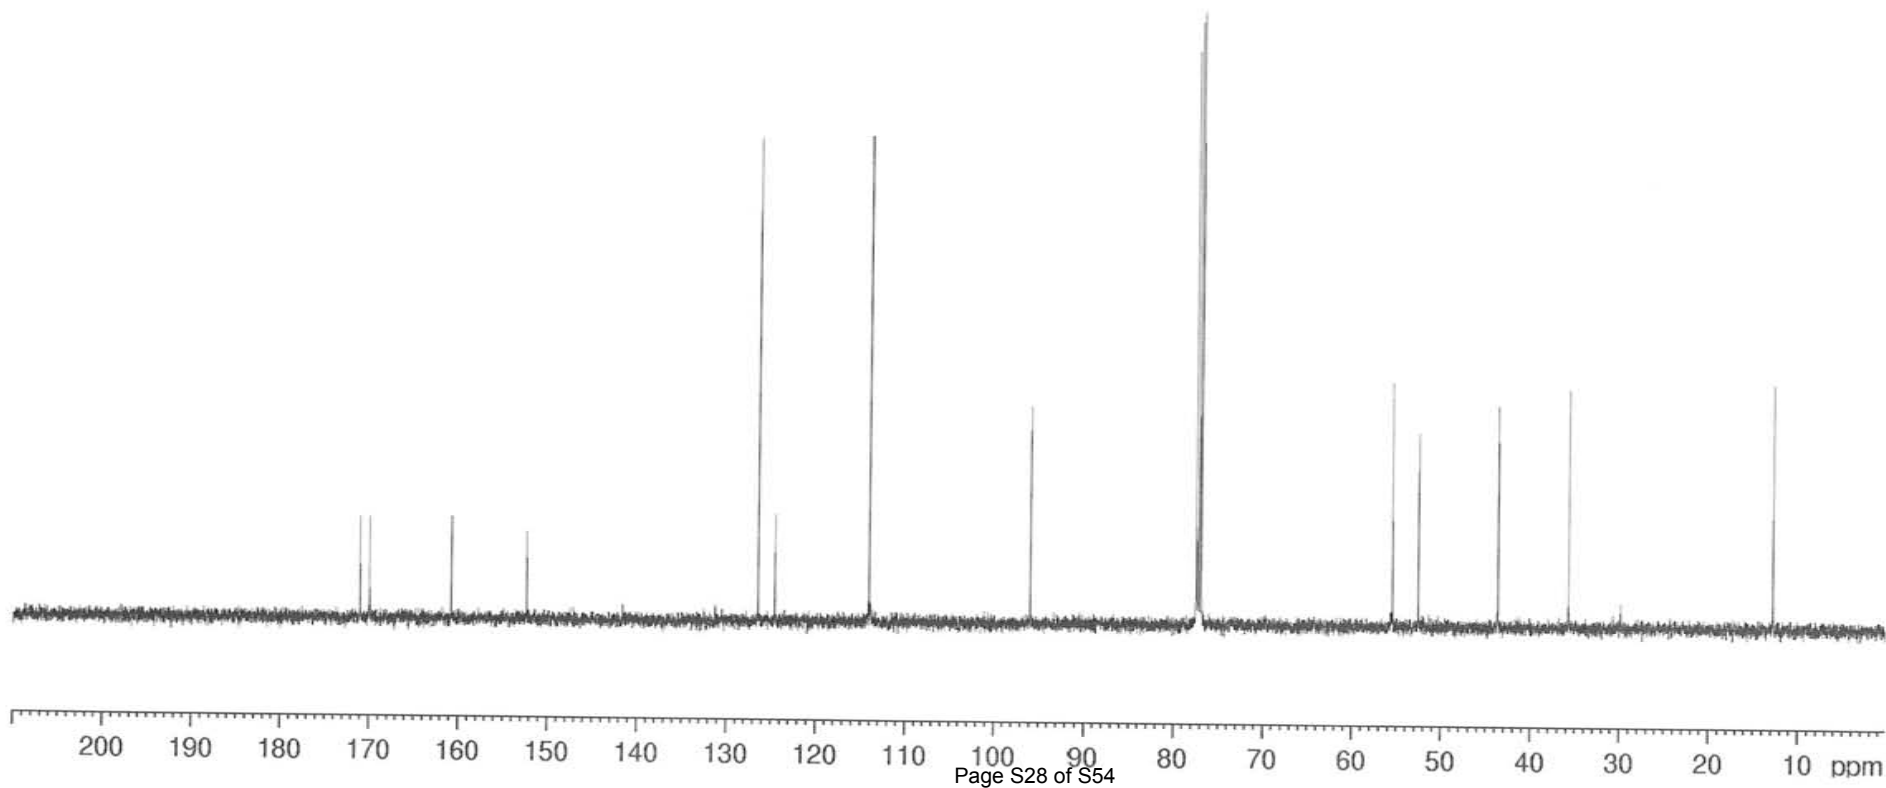

7.578  
7.574  
7.564  
7.561  
7.555  
7.260  
6.900  
6.896  
6.886  
6.882  
6.876

5.746  
5.733

3.896  
3.845  
3.828  
3.822  
3.742  
3.716  
3.711  
3.546  
3.534  
3.521

2.736  
2.724  
2.710

2.061  
2.048  
1.586  
1.445  
1.429  
1.418  
1.395  
1.390  
1.381  
1.372  
1.362  
1.357  
1.352  
1.348

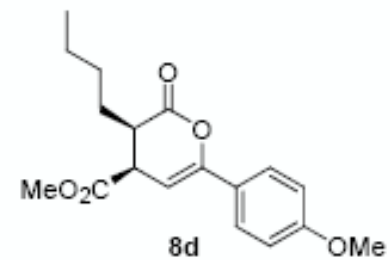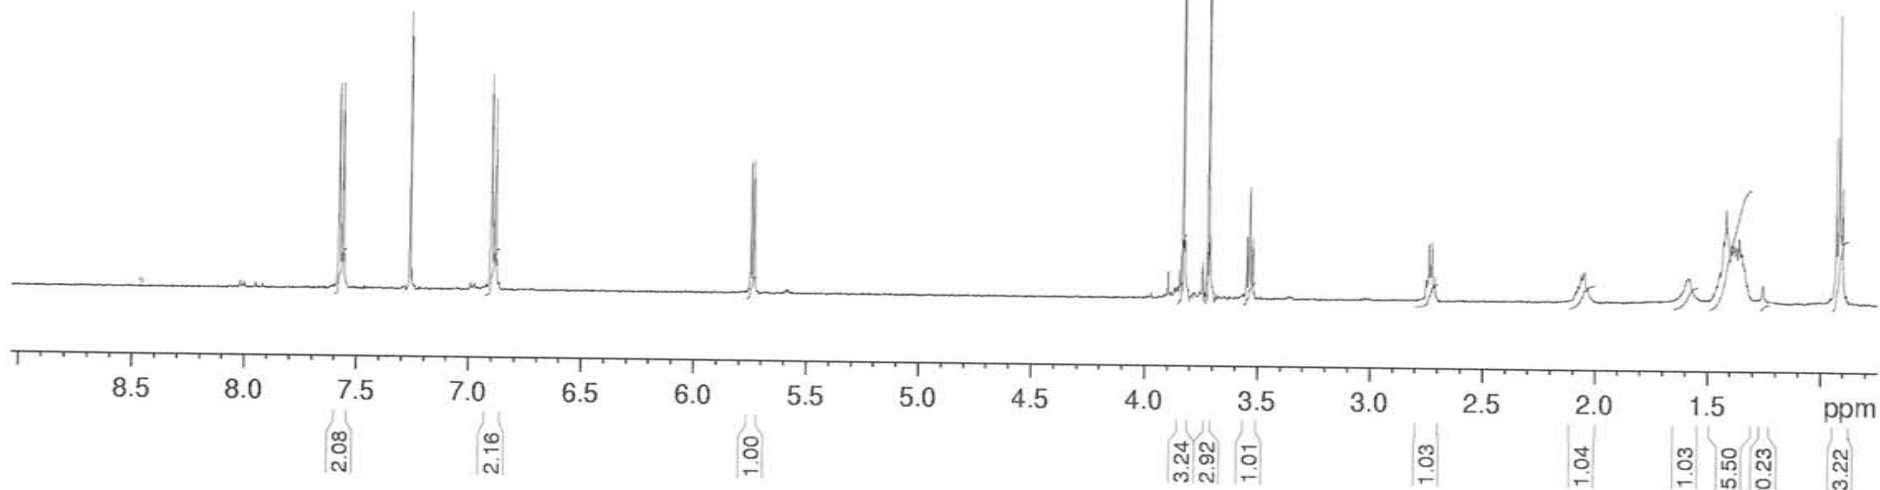

171.079  
169.489

160.776

152.188

126.447  
124.542

114.030

95.898

77.409  
77.155  
76.901

55.500  
52.564

41.868  
40.758

29.515  
26.997

22.607

13.983

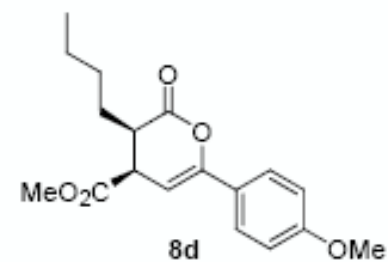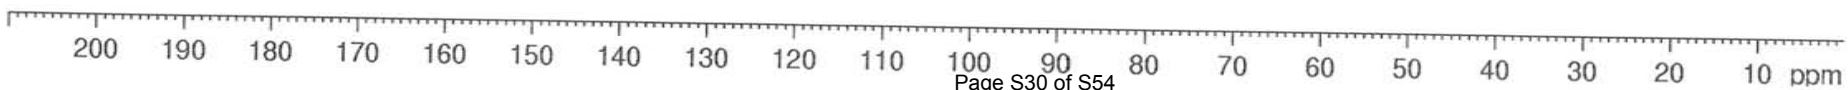

7.318  
7.304  
7.288  
7.260  
7.252  
7.237  
7.223  
7.149  
7.135

5.027  
5.014

4.222  
4.208  
4.194  
4.179

3.510  
3.501  
3.482  
3.472

3.011  
2.998  
2.986  
2.878  
2.868  
2.866

2.857  
2.848  
2.845  
2.836  
2.706

2.686  
2.677  
2.657

1.937  
1.901

1.556  
1.300  
1.285  
1.271

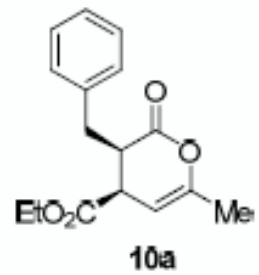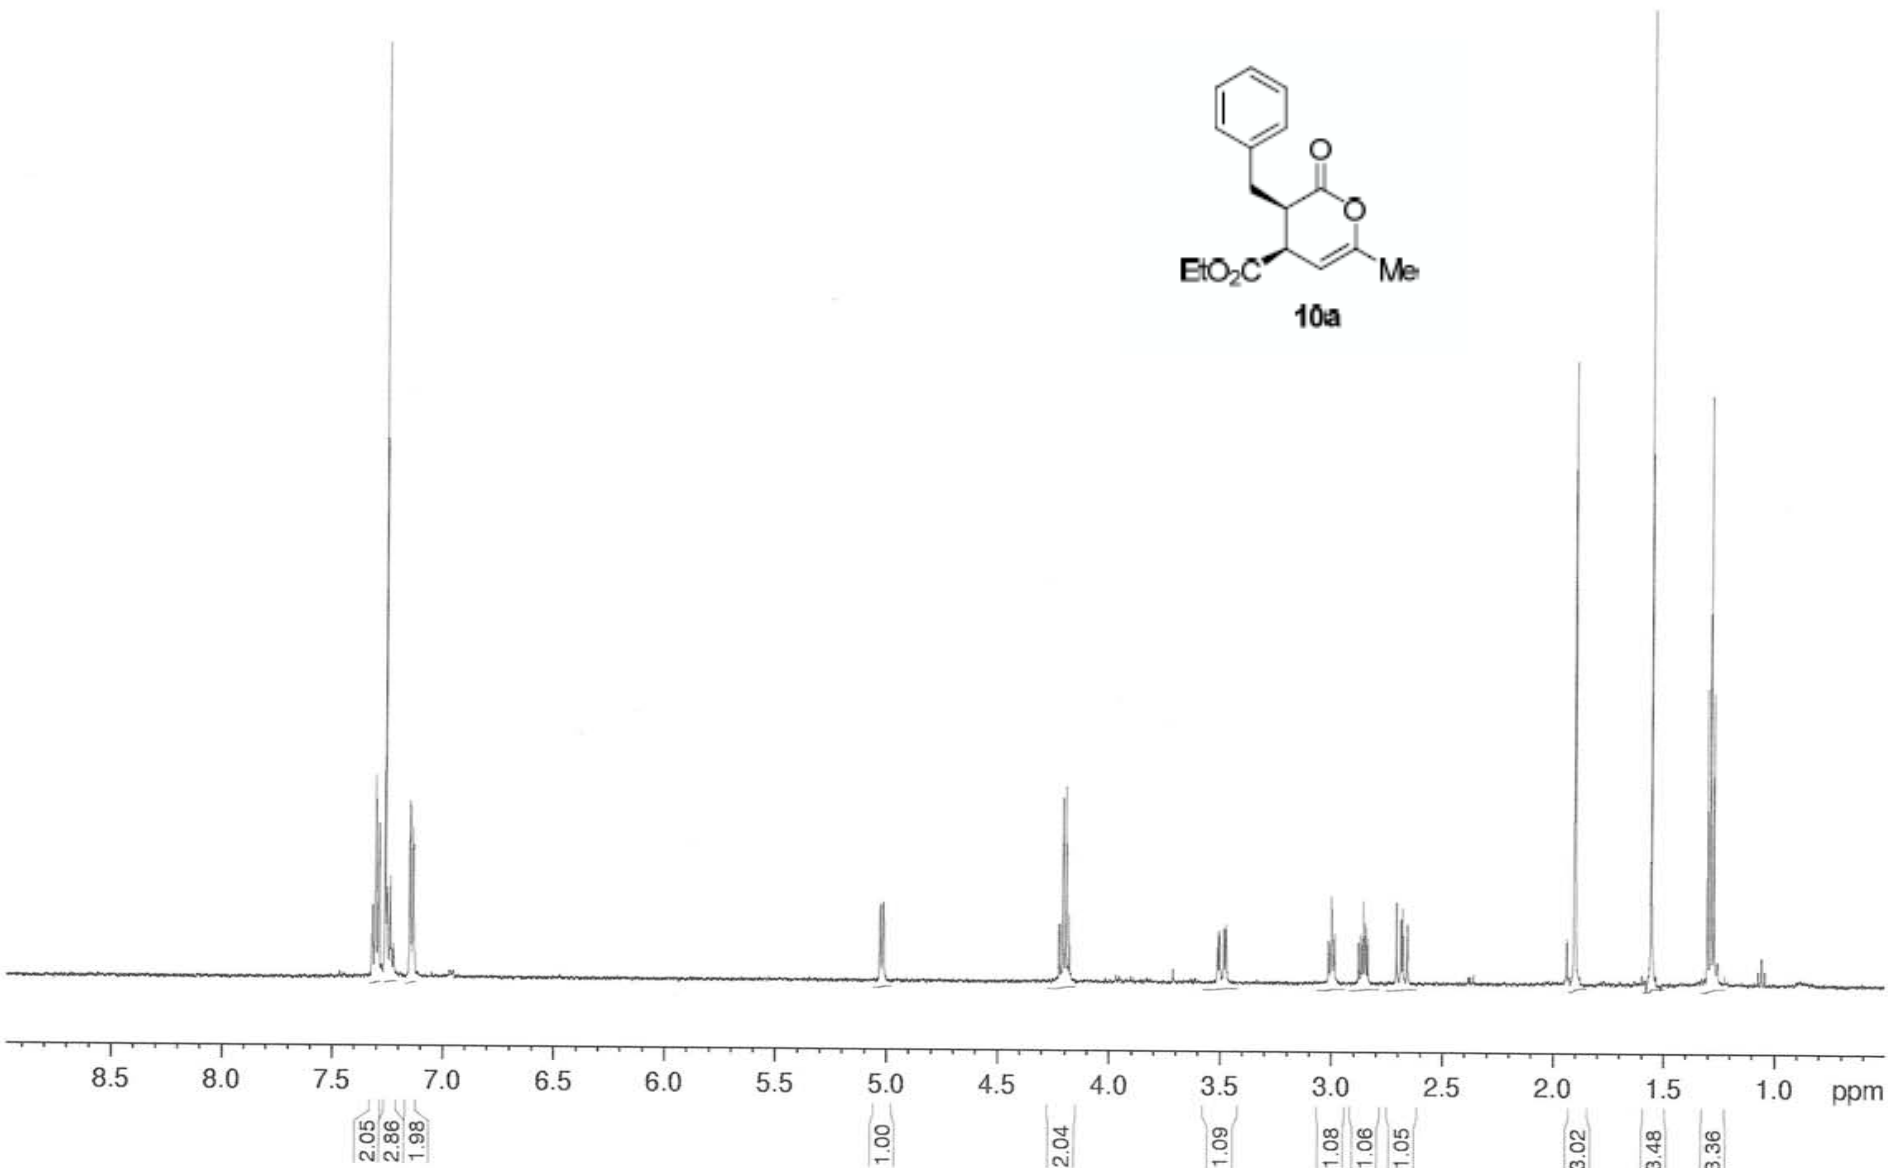

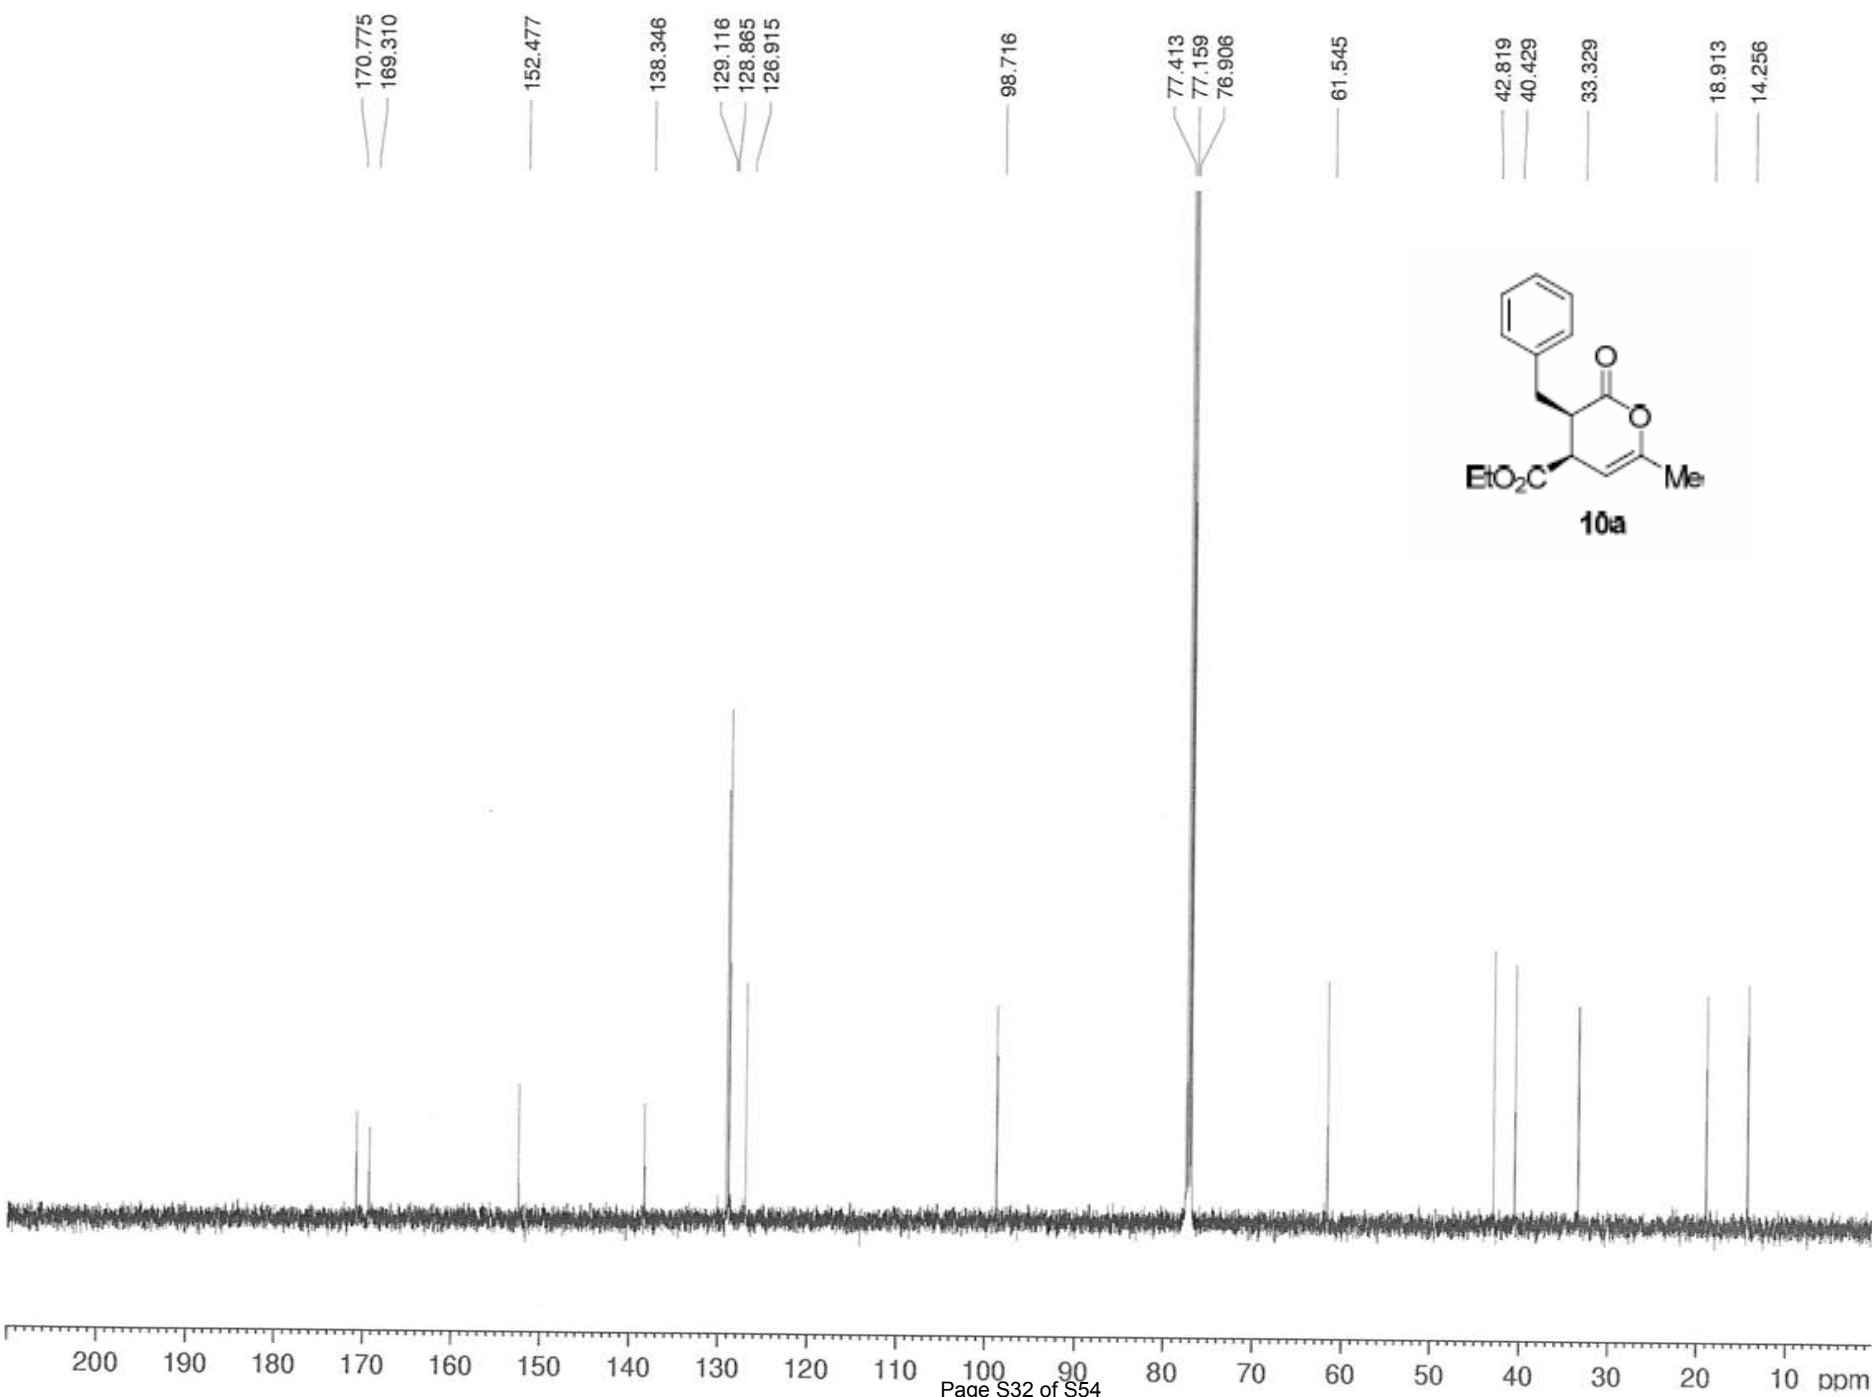



7.260  
7.062  
7.048  
7.045  
6.849  
6.843  
6.839  
6.830  
6.826

5.028  
5.026  
5.014  
5.012

4.215  
4.200  
4.186  
4.172

3.786  
3.435  
3.425  
3.406  
3.396

3.019  
3.017  
3.006  
2.994

2.826  
2.816  
2.814  
2.805

2.796  
2.794  
2.784  
2.648  
2.628  
2.619

2.599  
1.897  
1.895

1.296  
1.281  
1.267

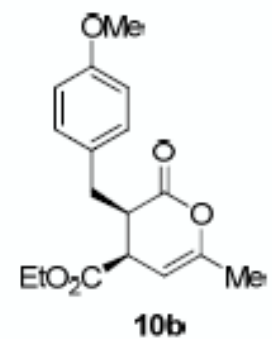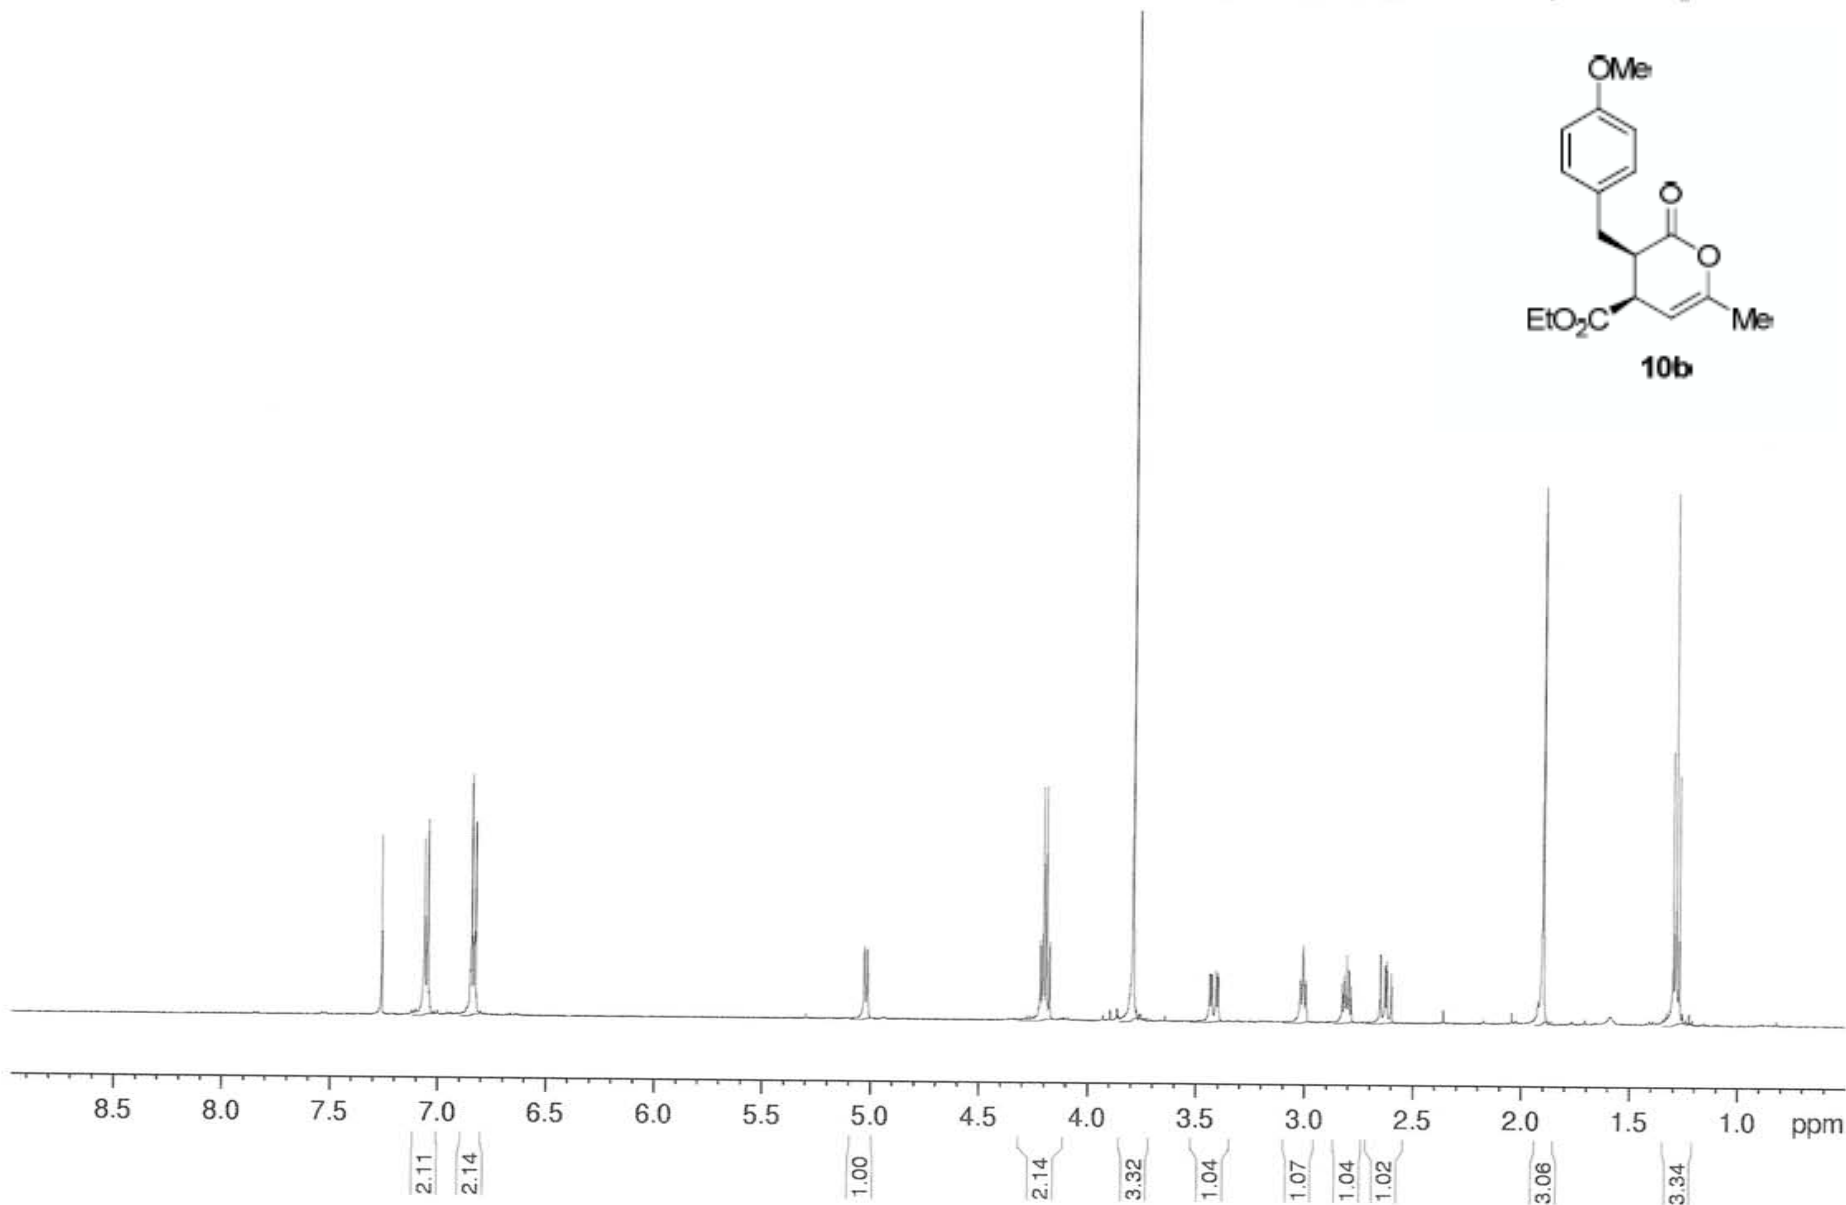

170.803  
169.367

158.581  
152.440

130.236  
130.086

114.259

98.714

77.414  
77.159  
76.906

61.508  
55.400

42.977  
40.424

32.431

18.903  
14.257

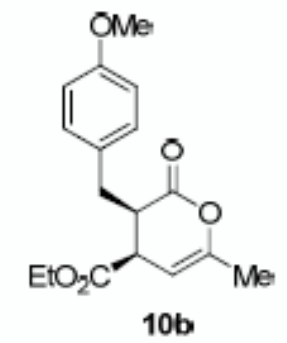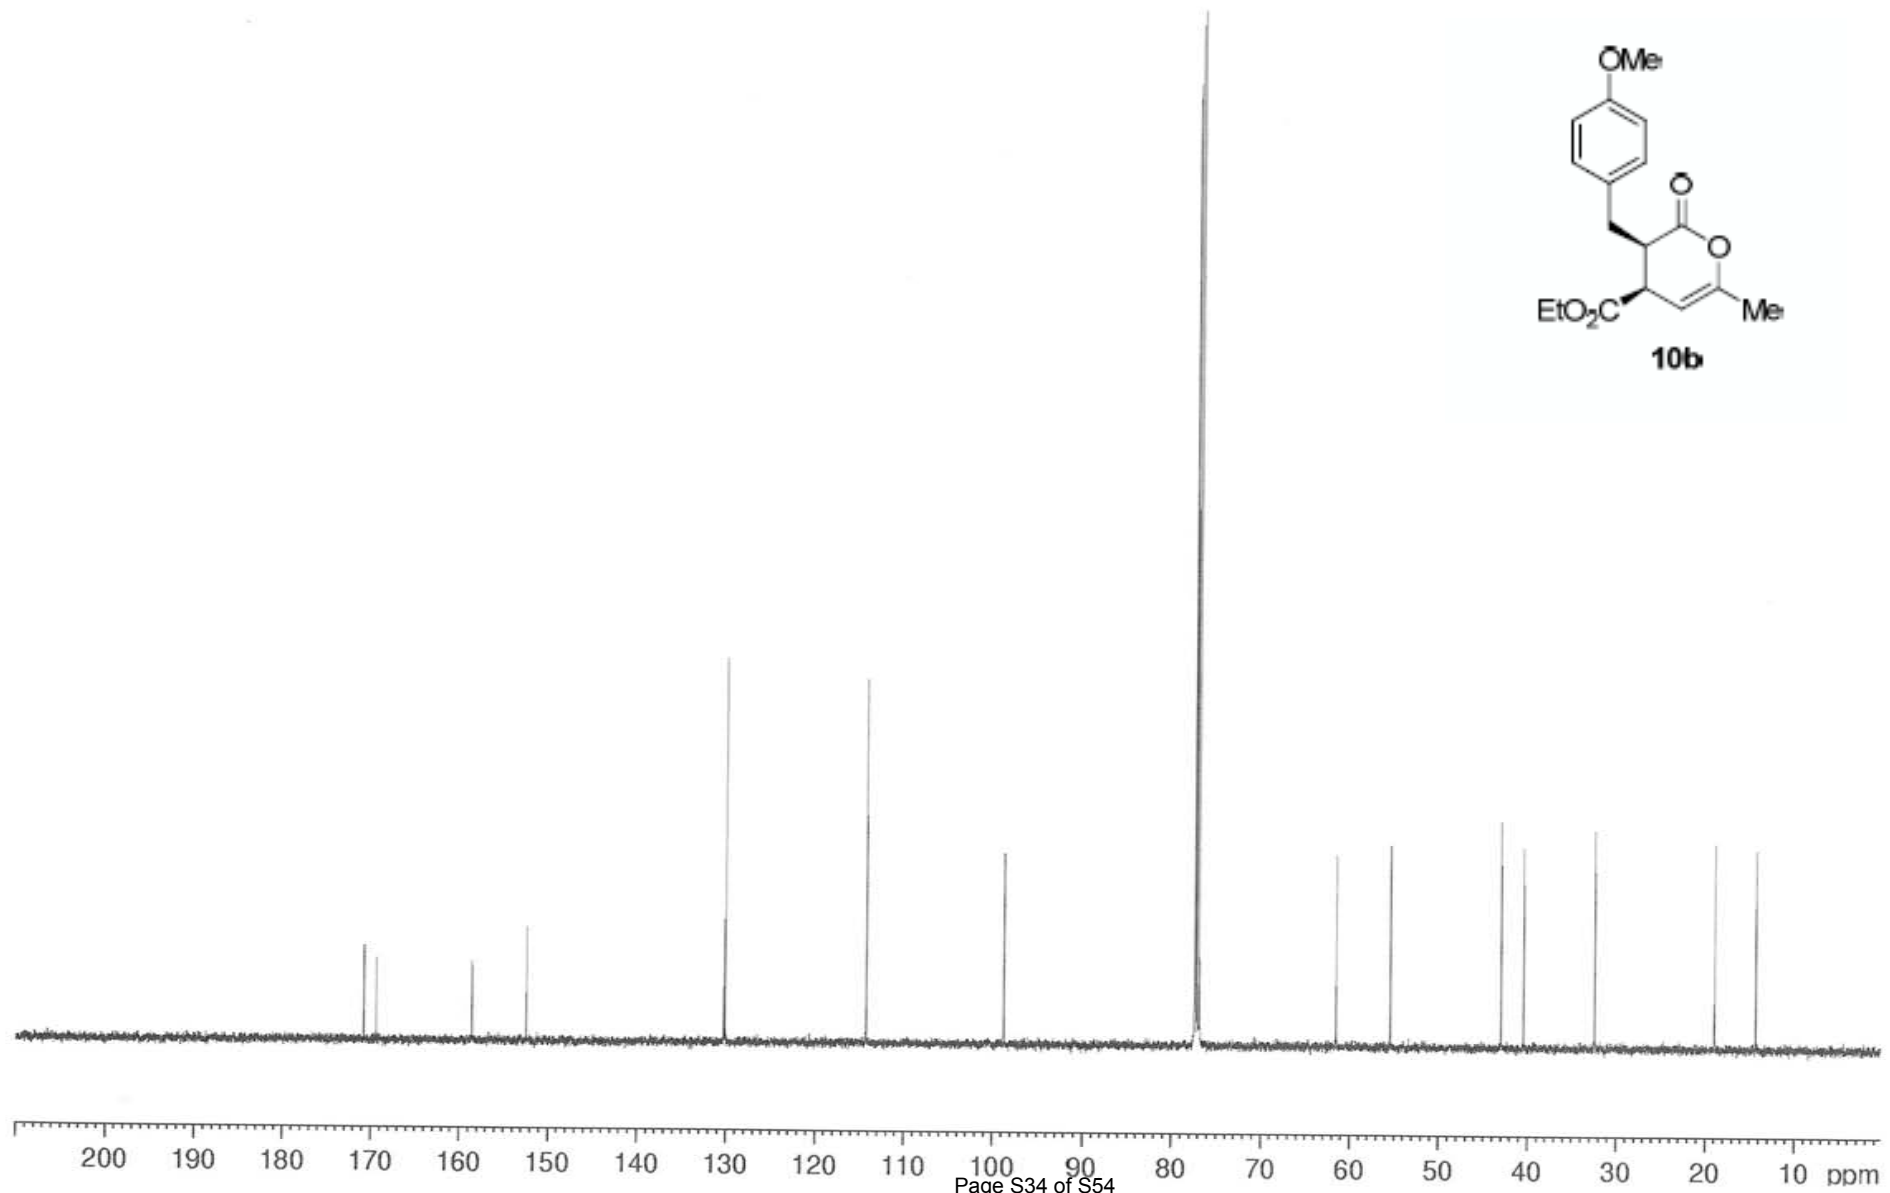

7.319  
7.318  
7.316  
7.314  
7.260

6.293  
6.290  
6.287  
6.283  
6.061  
6.055

5.073  
5.071  
5.059  
5.057  
4.199  
4.194  
4.185  
4.180  
4.171  
4.166  
4.156  
4.151  
3.462  
3.453  
3.431  
3.422  
3.081  
3.079  
3.067  
3.055  
3.054  
3.020  
3.010  
3.008  
3.000  
2.990  
2.988  
2.978  
2.875  
2.854  
2.844  
2.823  
1.910  
1.908  
1.906  
1.556  
1.277  
1.263  
1.254  
1.249

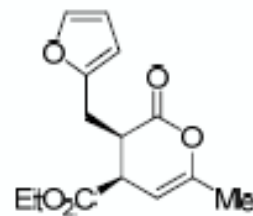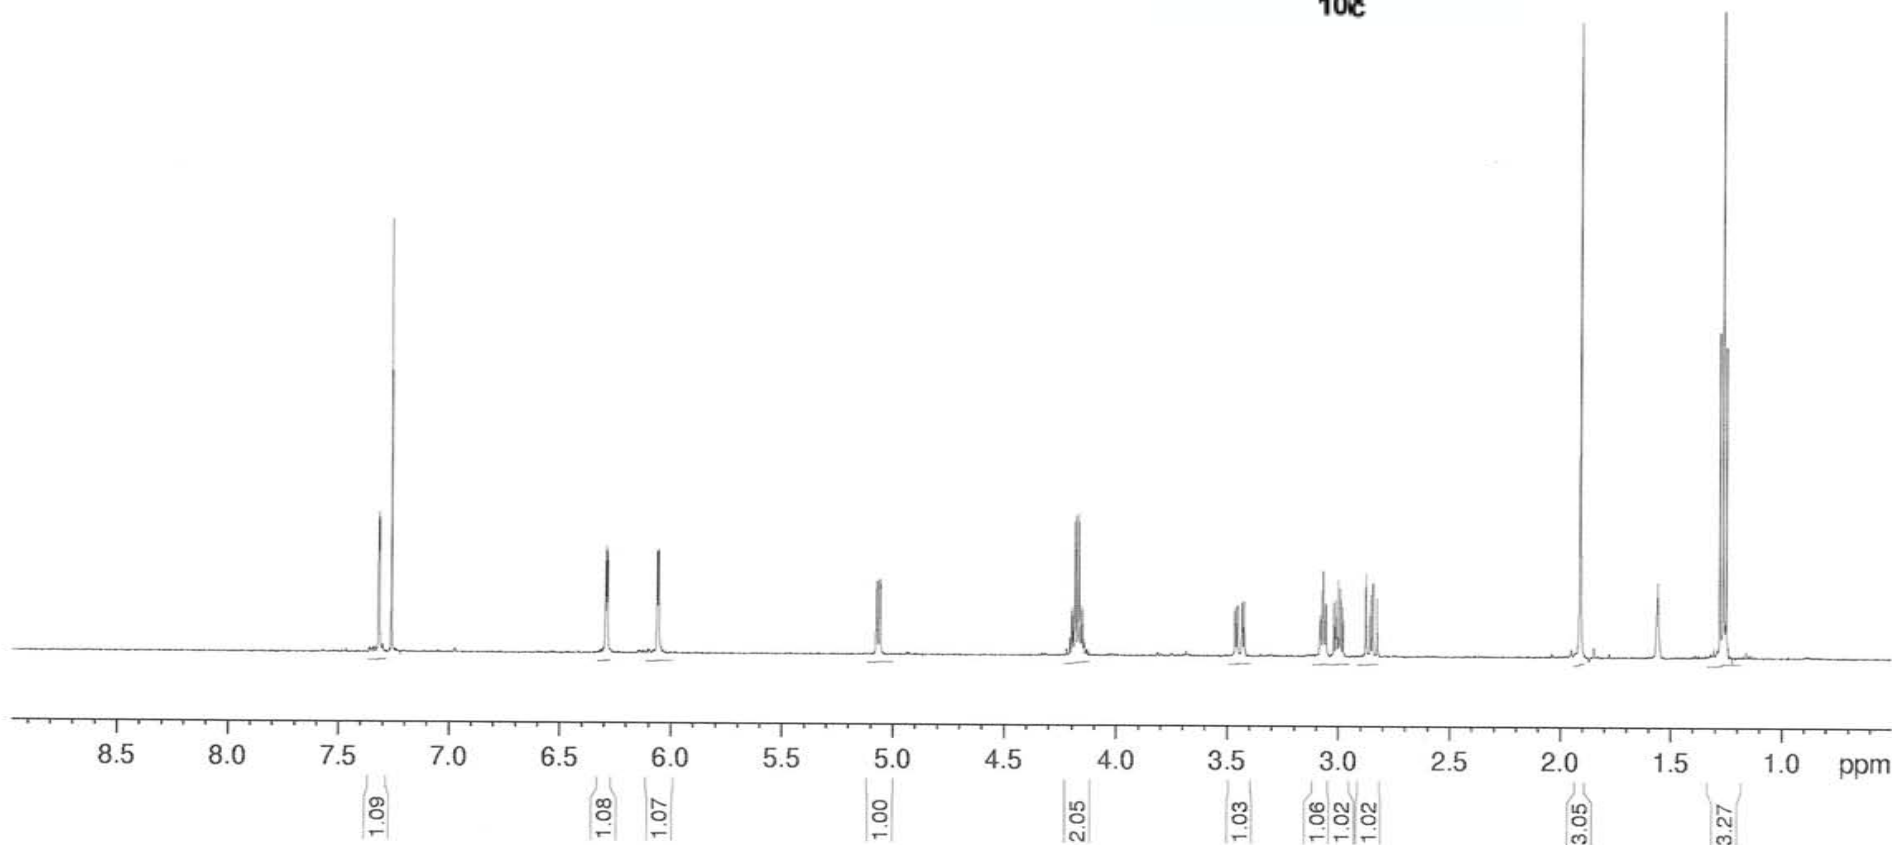

170.555  
168.863

152.450  
151.922

141.917

110.533  
107.570

98.647

77.416  
77.162  
76.908

61.507

40.640  
40.048

25.938

18.909

14.212

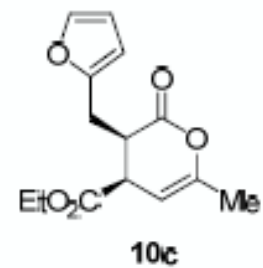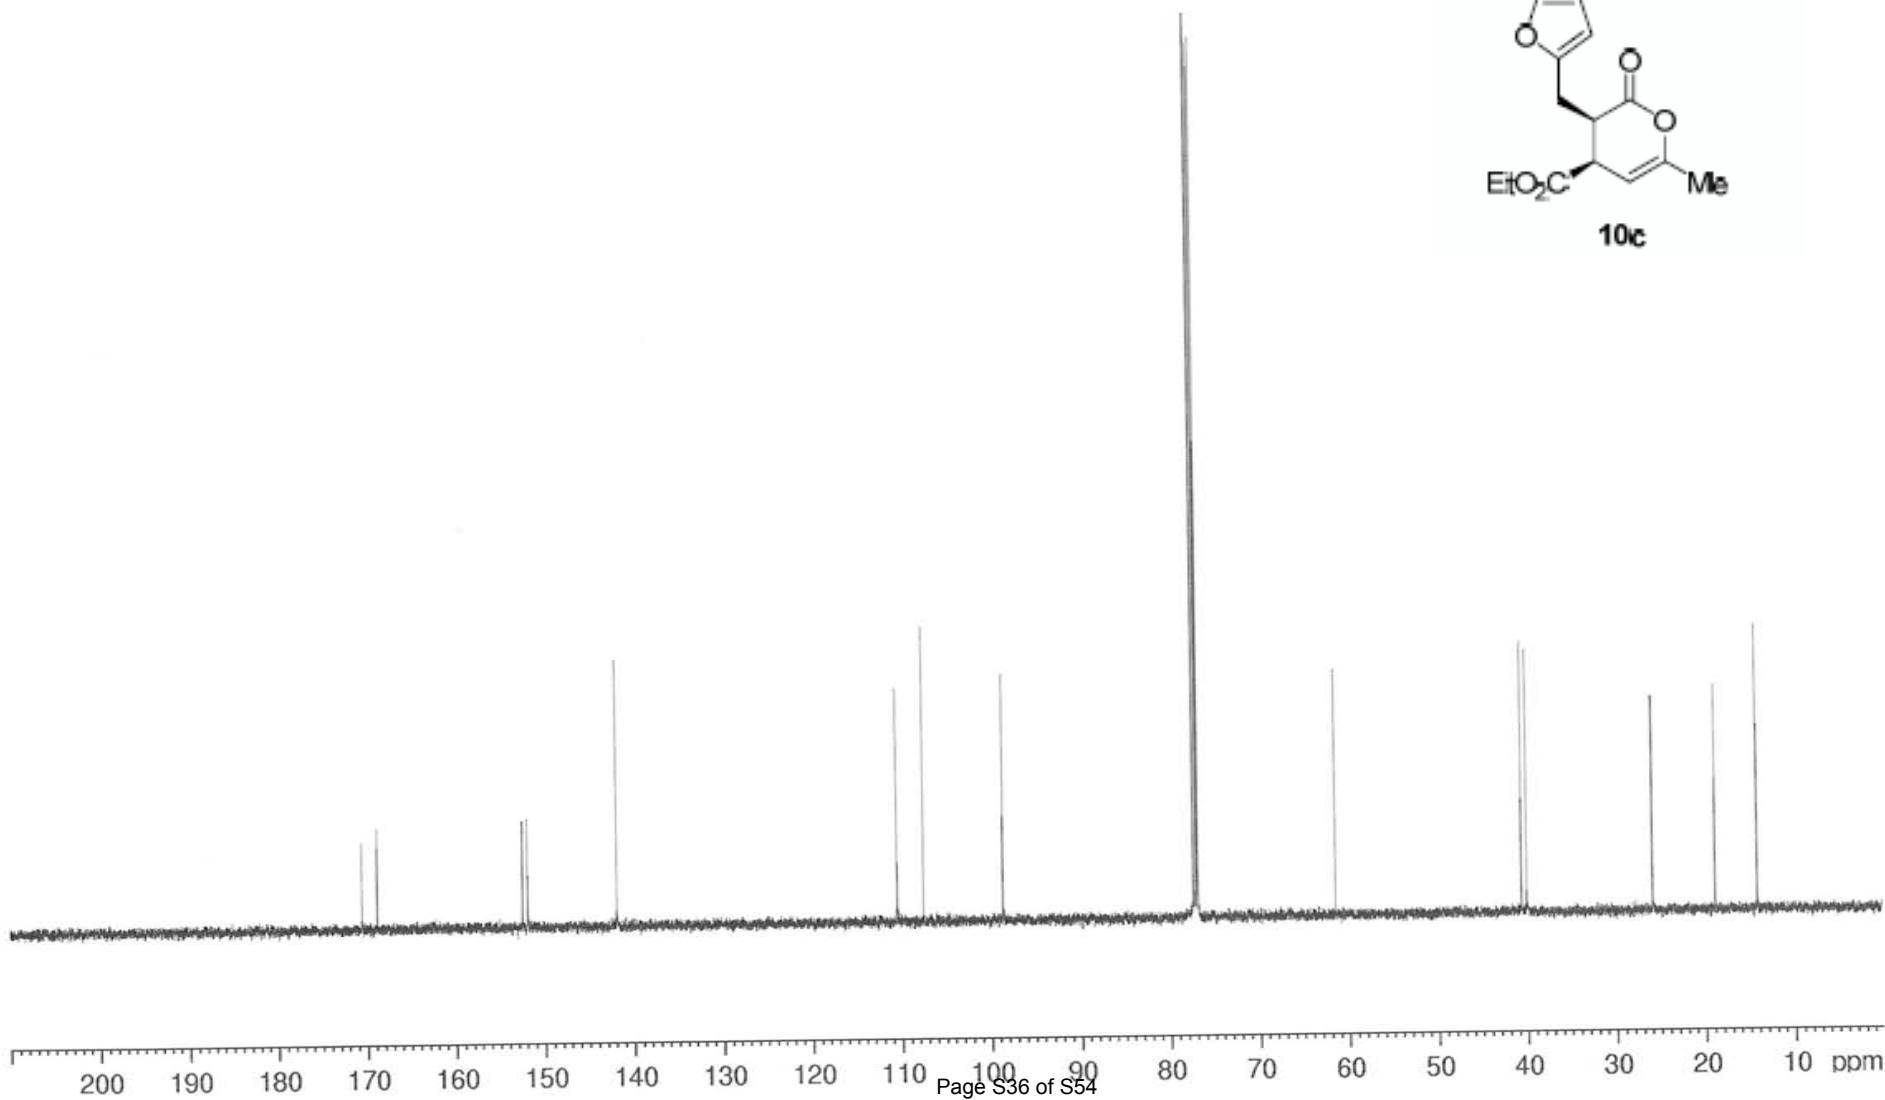

7.430  
7.413  
7.261  
7.259  
7.037  
7.021

5.036  
5.023

4.211  
4.197  
4.183  
4.168

3.437  
3.427  
3.409  
3.399  
3.004

2.992  
2.979  
2.838  
2.826  
2.817

2.807  
2.797  
2.670  
2.650  
2.641  
2.621

1.901  
1.899

1.574  
1.291  
1.277  
1.262

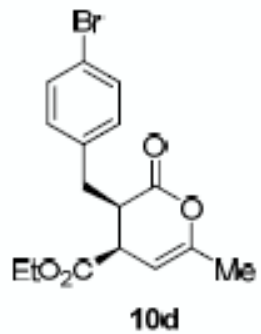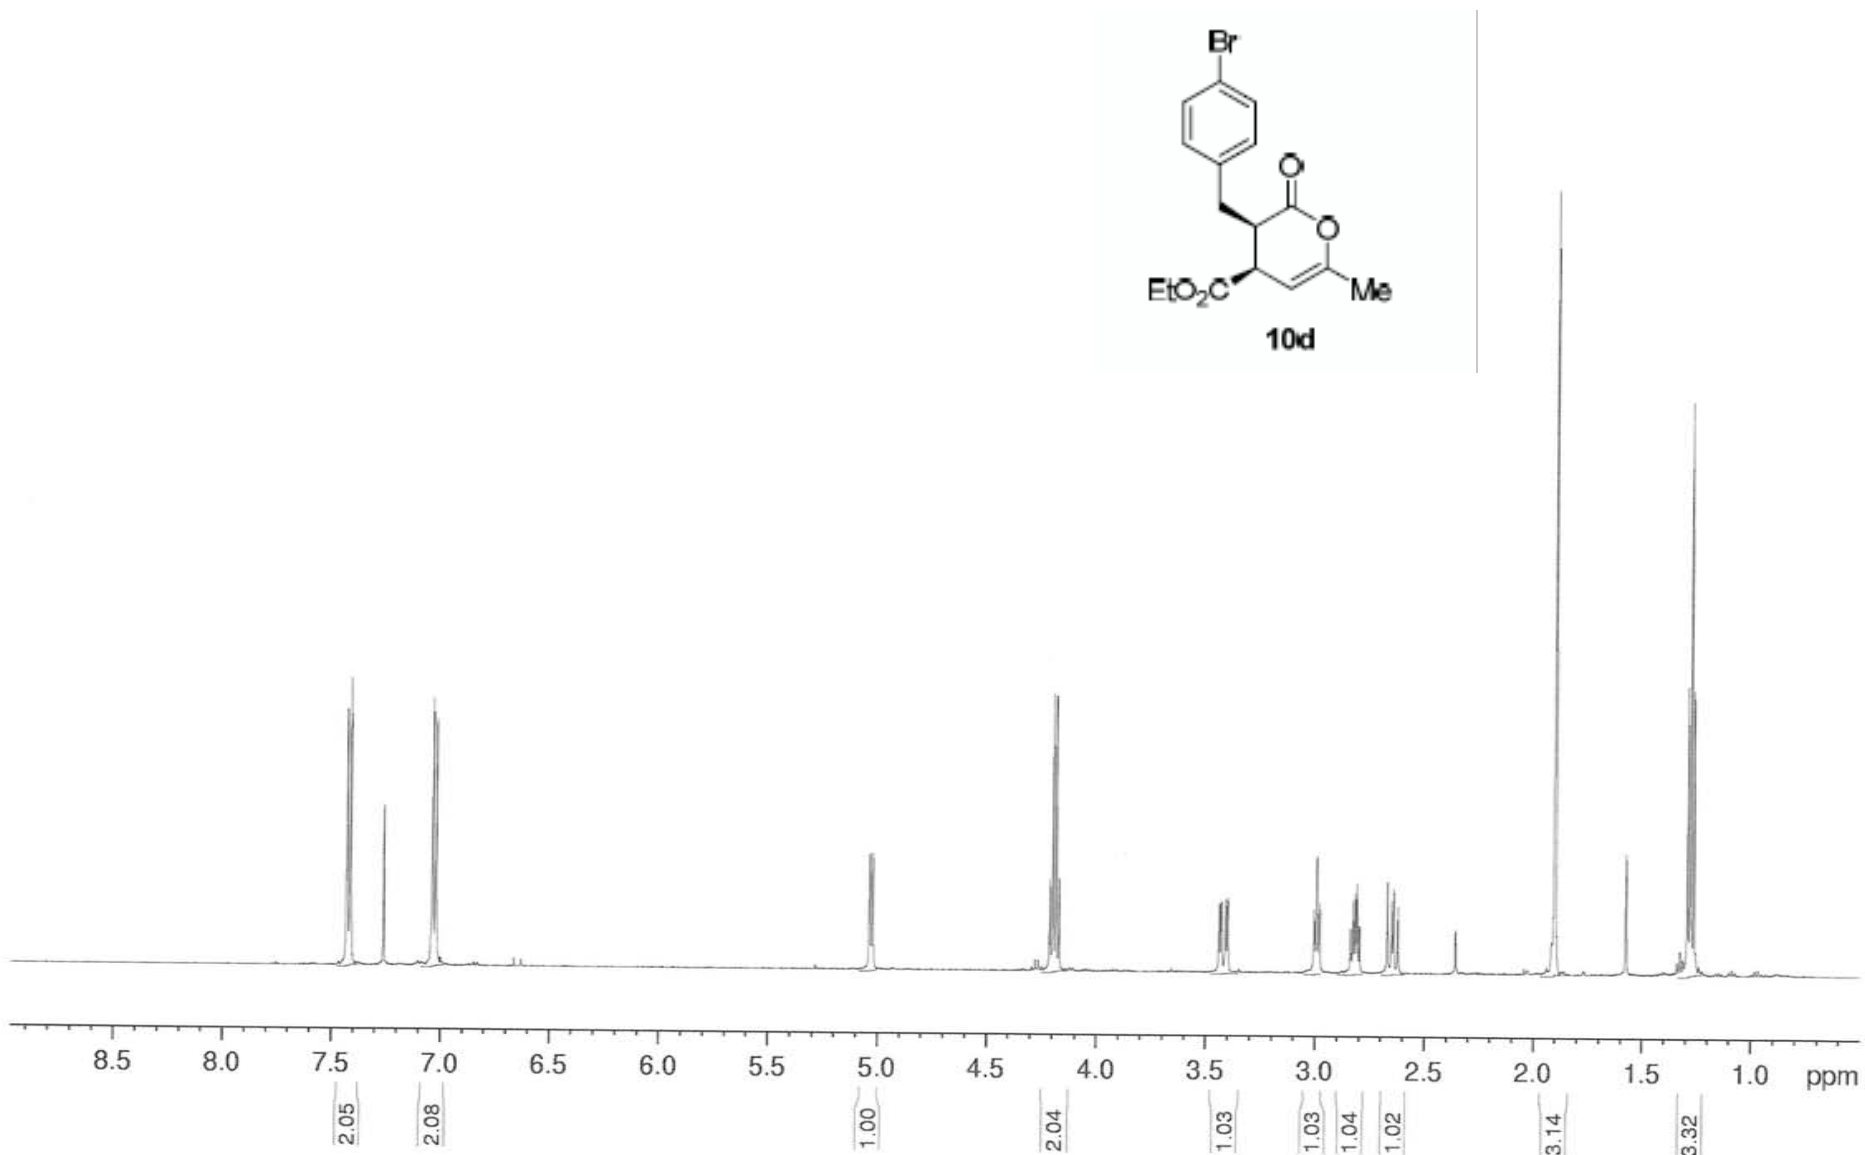

170.603  
168.964

152.564

137.369

131.954  
130.855

120.830

98.569

77.412  
77.158  
76.905

61.625

42.630  
40.560

32.851

18.897

14.248

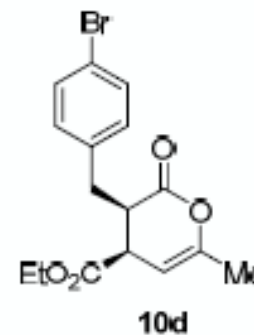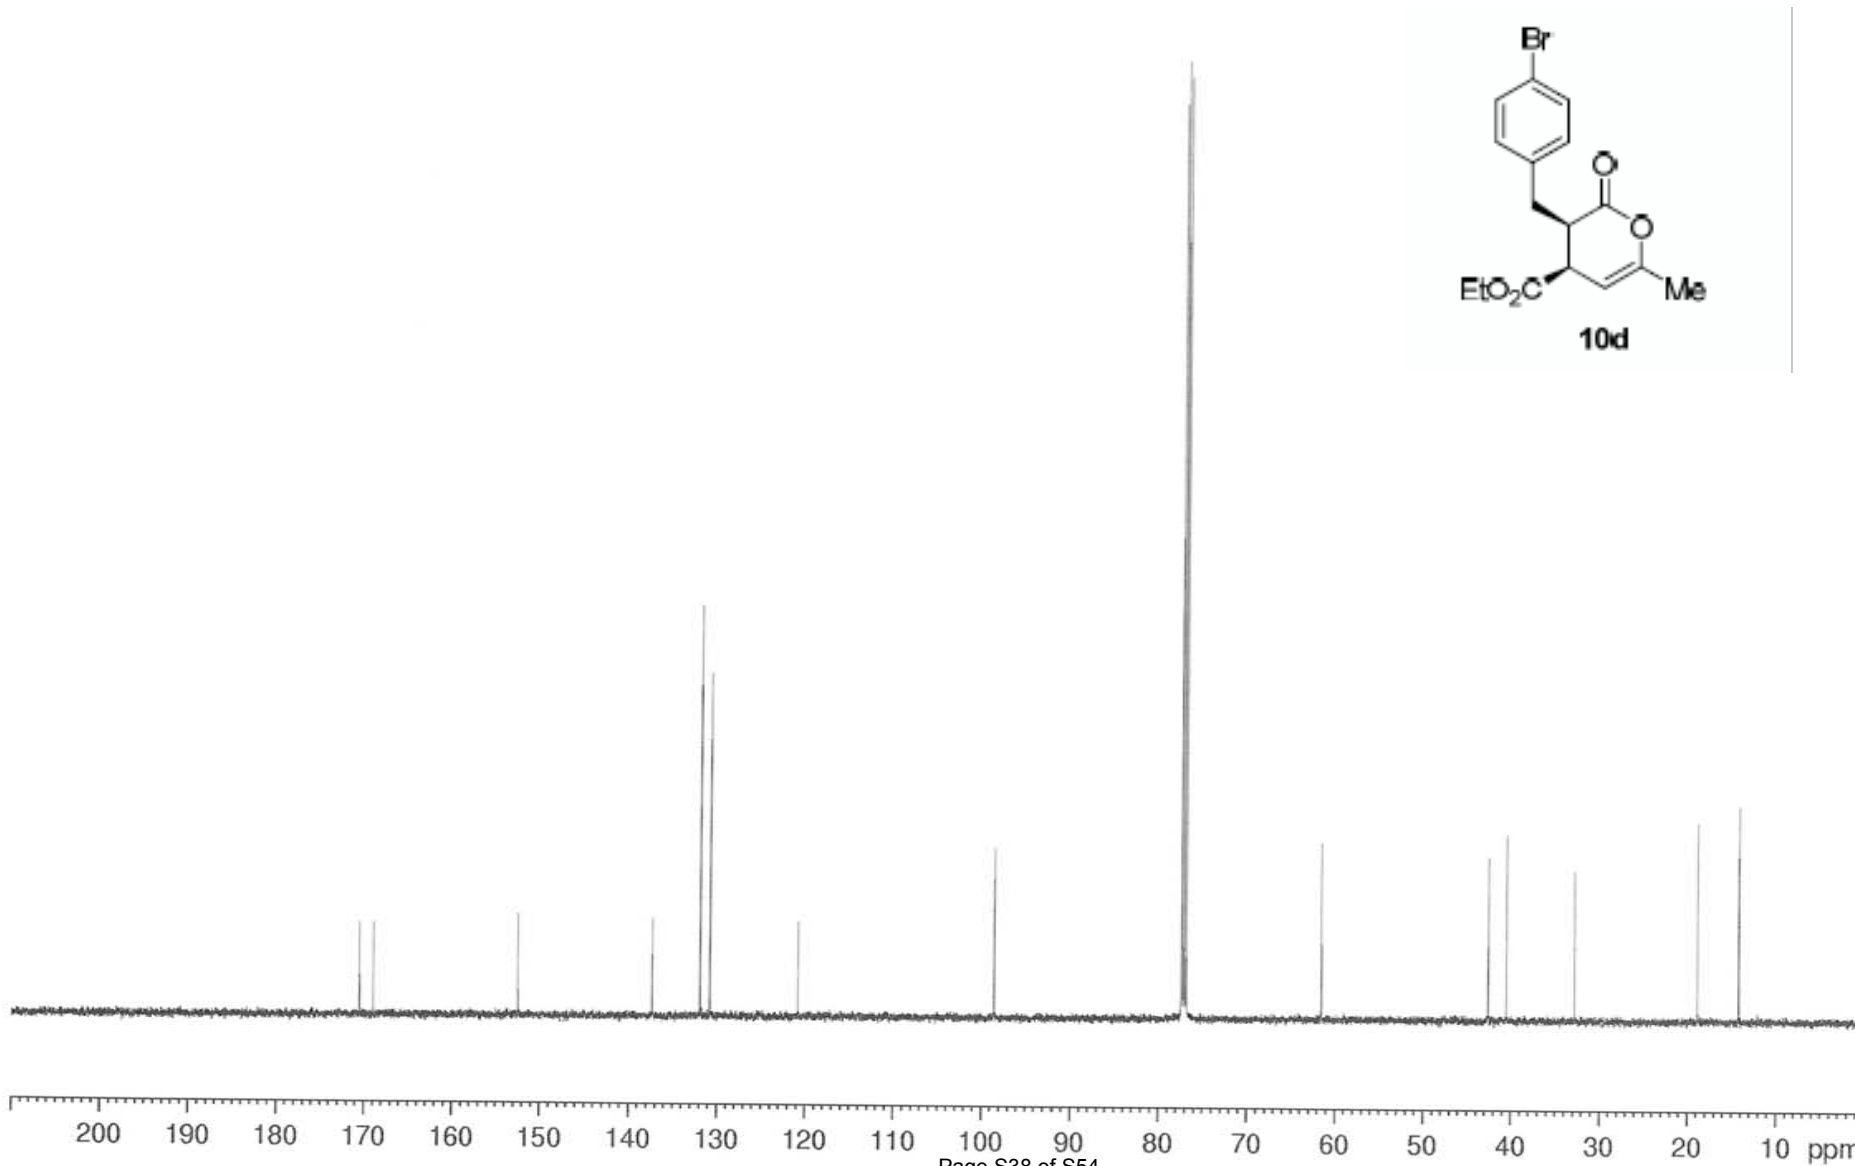

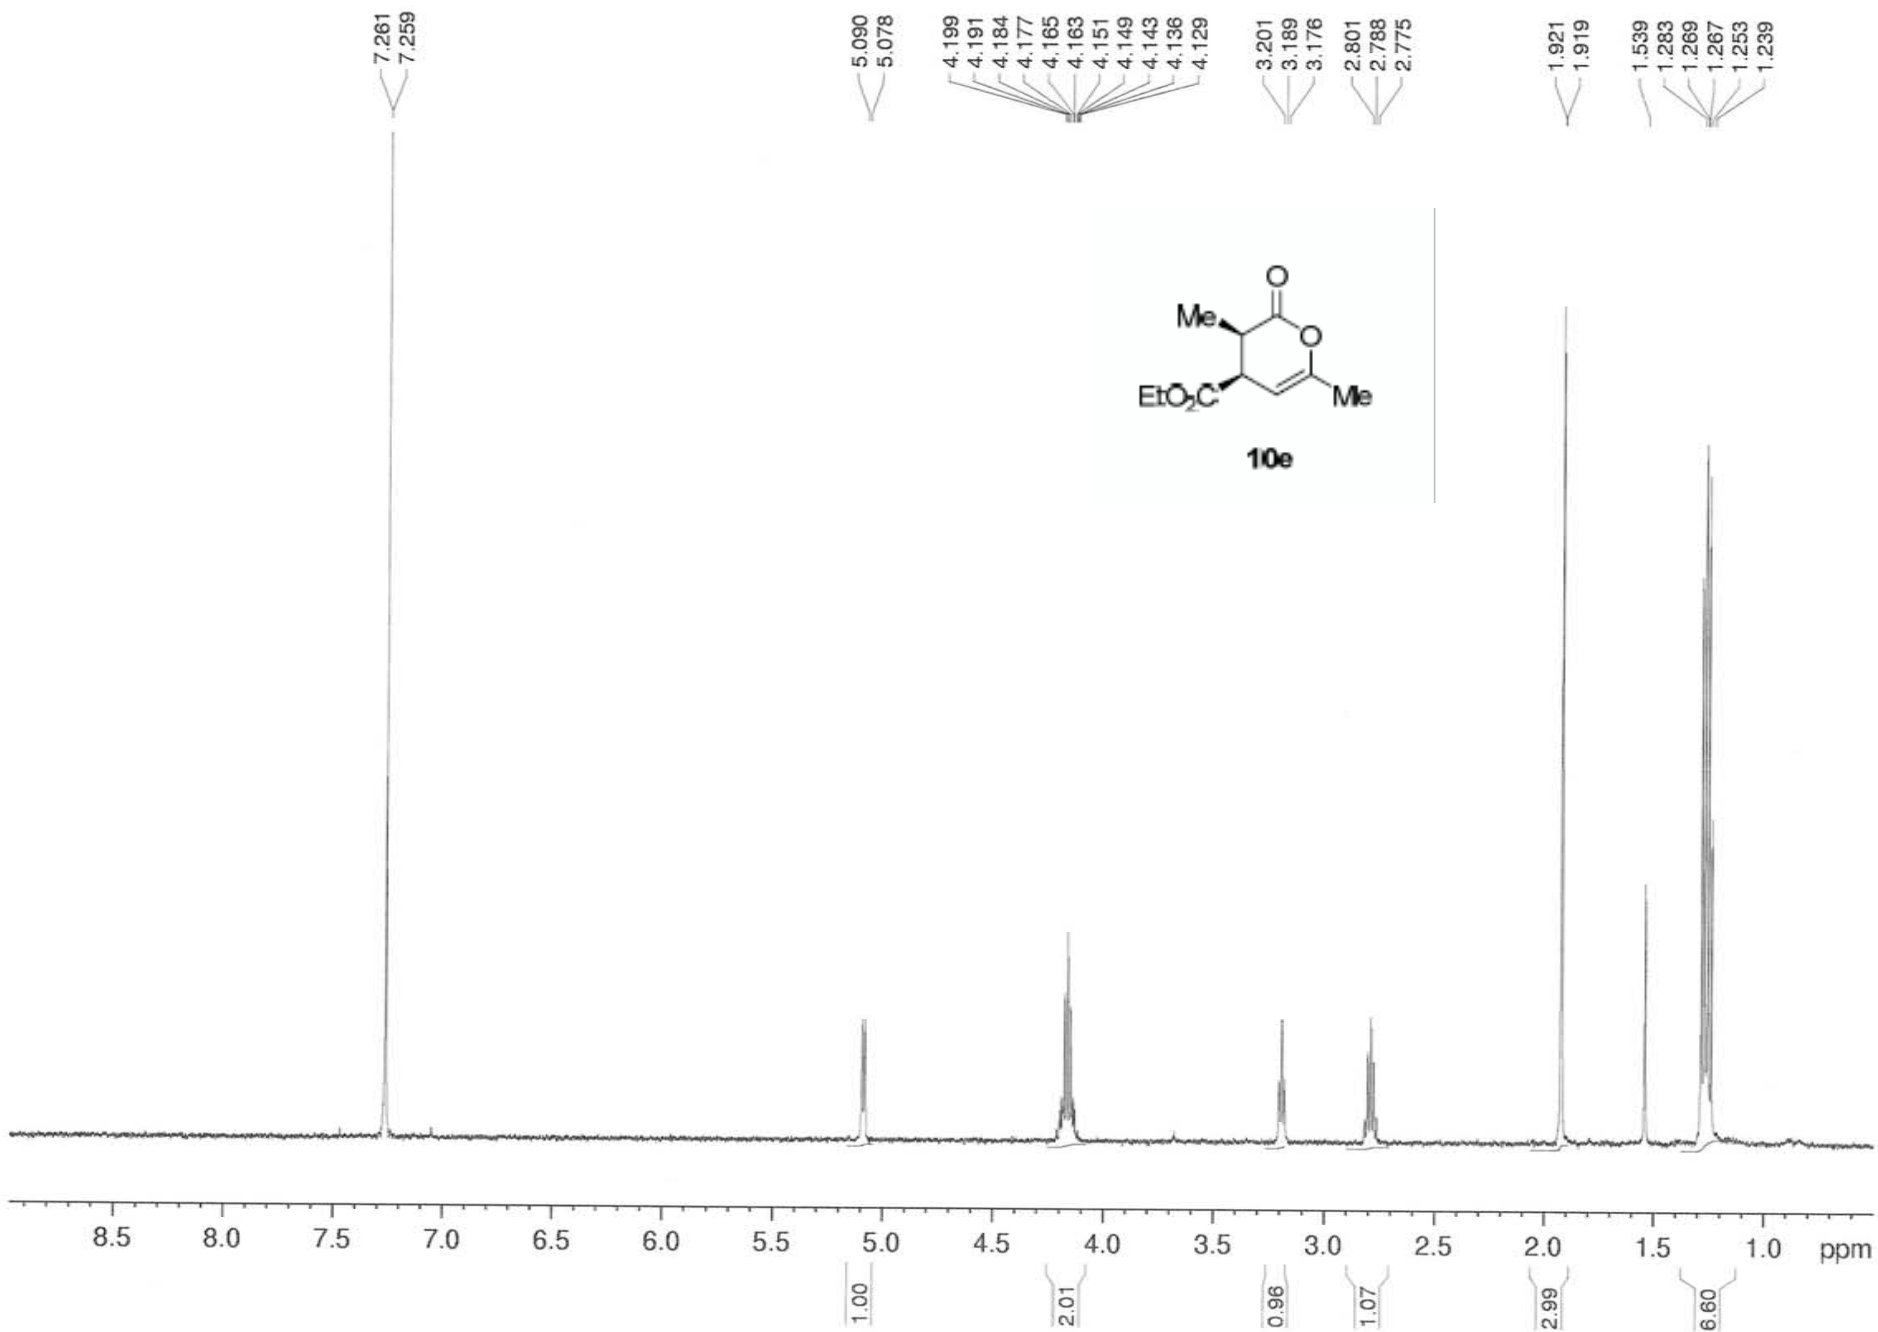

170.835  
170.271

152.363

98.444

77.439  
77.185  
76.931

61.458

43.512

35.572

18.940

14.175  
12.595

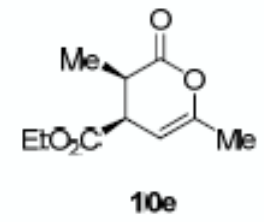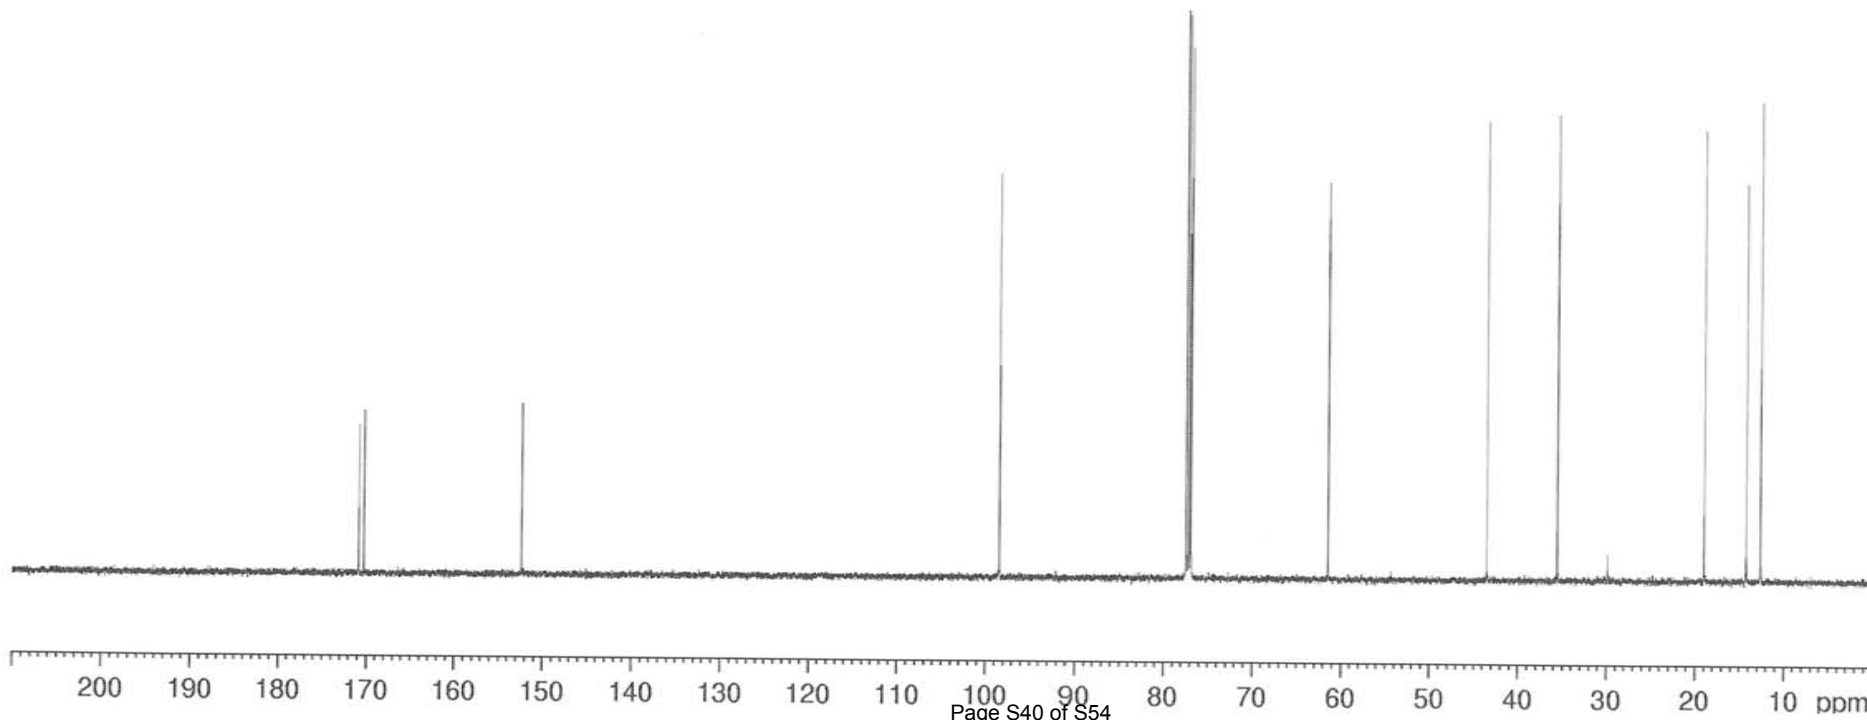



7.261

5.089  
5.076

4.172  
4.169  
4.158  
4.155  
4.143  
4.140  
4.129  
4.126

3.280  
3.267  
3.255

2.607  
2.595  
2.583  
2.570

2.006  
1.994  
1.906  
1.596

1.389  
1.375  
1.365  
1.349

1.340  
1.330  
1.314

1.302  
1.253  
1.251  
1.239

1.237  
1.224

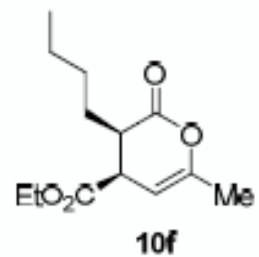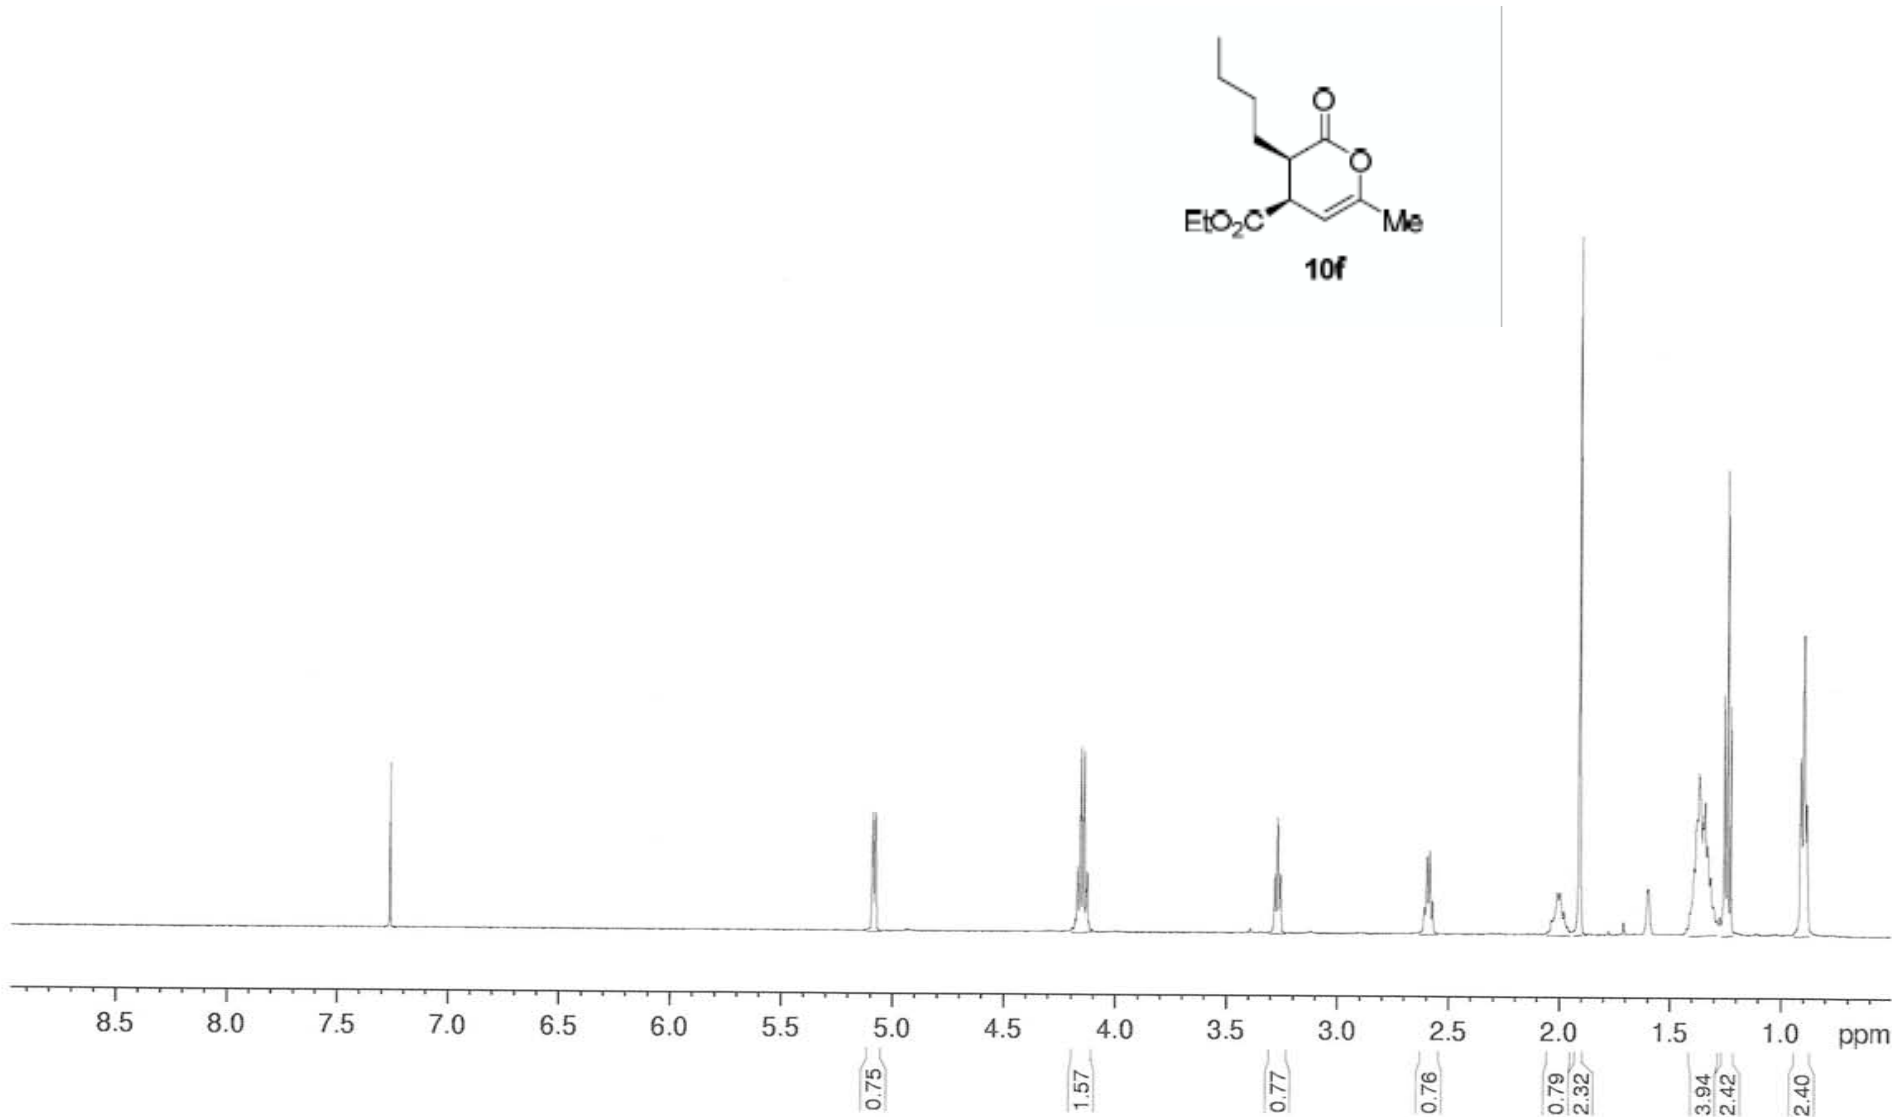

170.866  
169.801

152.210

98.412

77.411  
77.157  
76.903

61.438

41.675  
40.648

29.455  
26.885

22.593  
18.901

14.184  
13.958

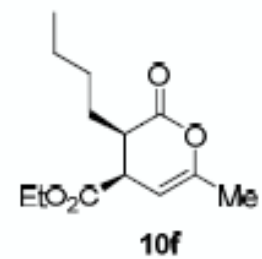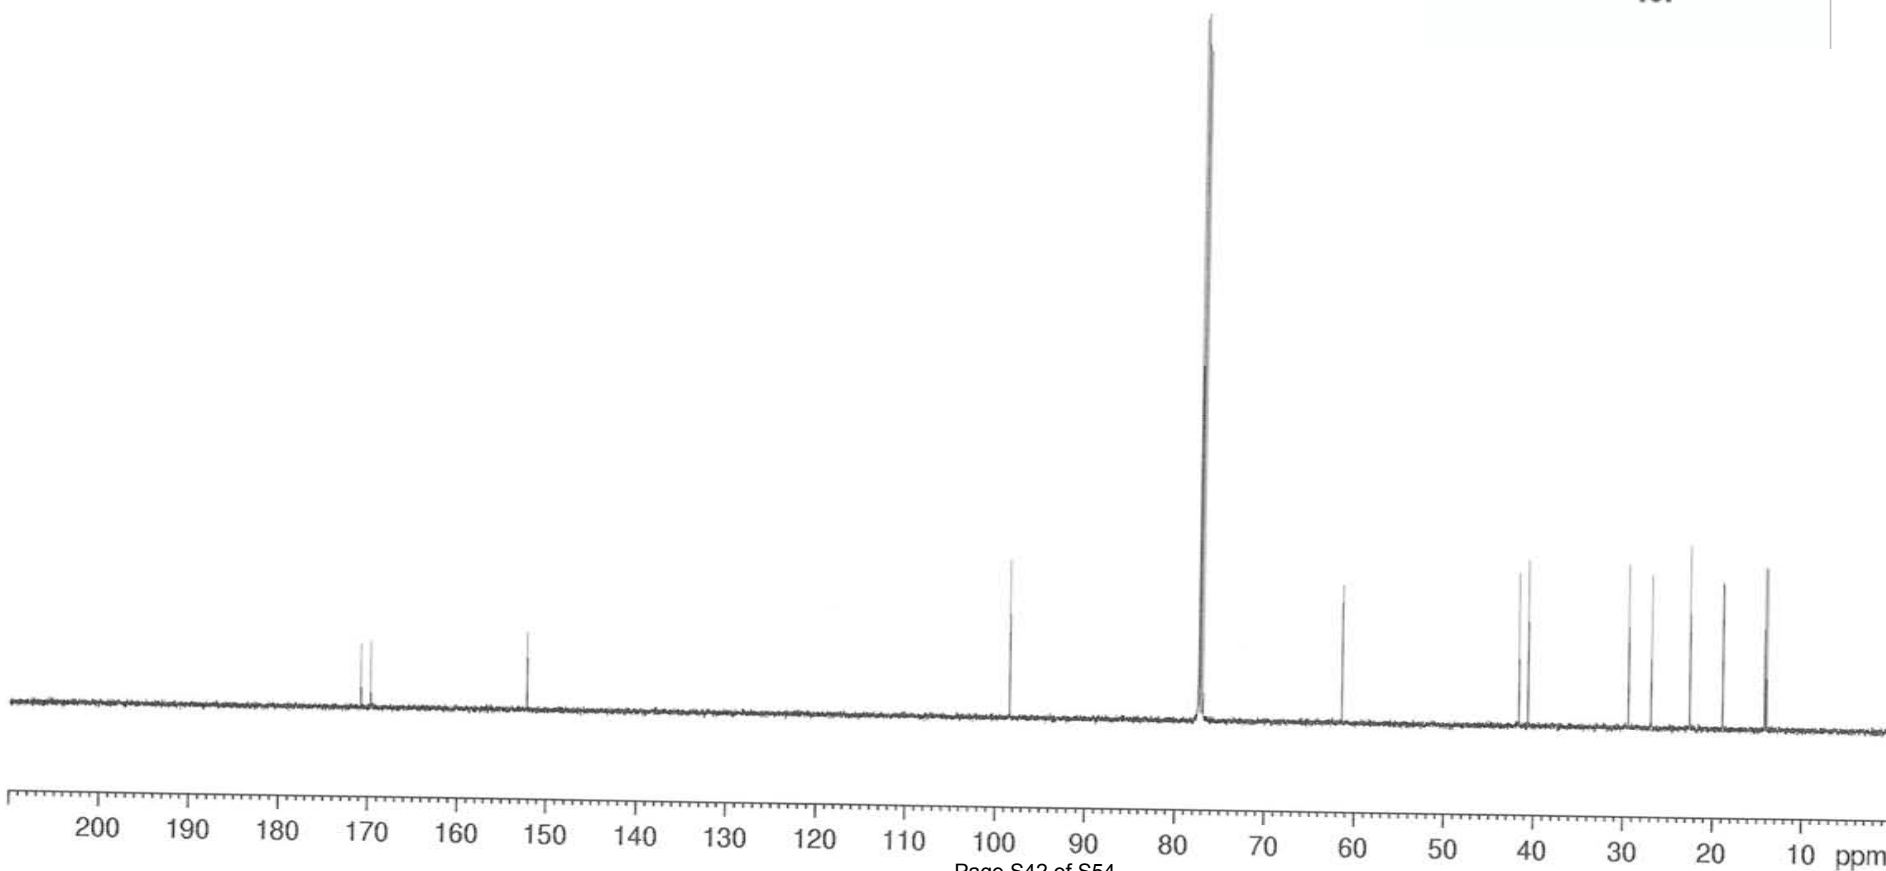

7.327  
7.312  
7.297  
7.261  
7.259  
7.253  
7.239  
7.223  
7.211  
7.196  
6.560  
6.547

4.311  
4.297  
4.283  
4.268  
3.415  
3.405  
3.386  
3.376  
2.985  
2.974  
2.964  
2.954  
2.943  
2.935  
2.759  
2.739  
2.729  
2.710  
2.508  
2.494  
2.480  
2.467  
2.454  
2.440  
1.342  
1.328  
1.327  
1.313  
1.064  
1.050

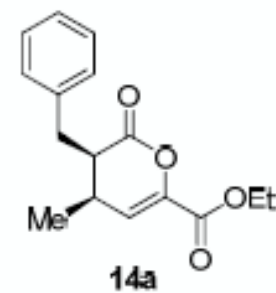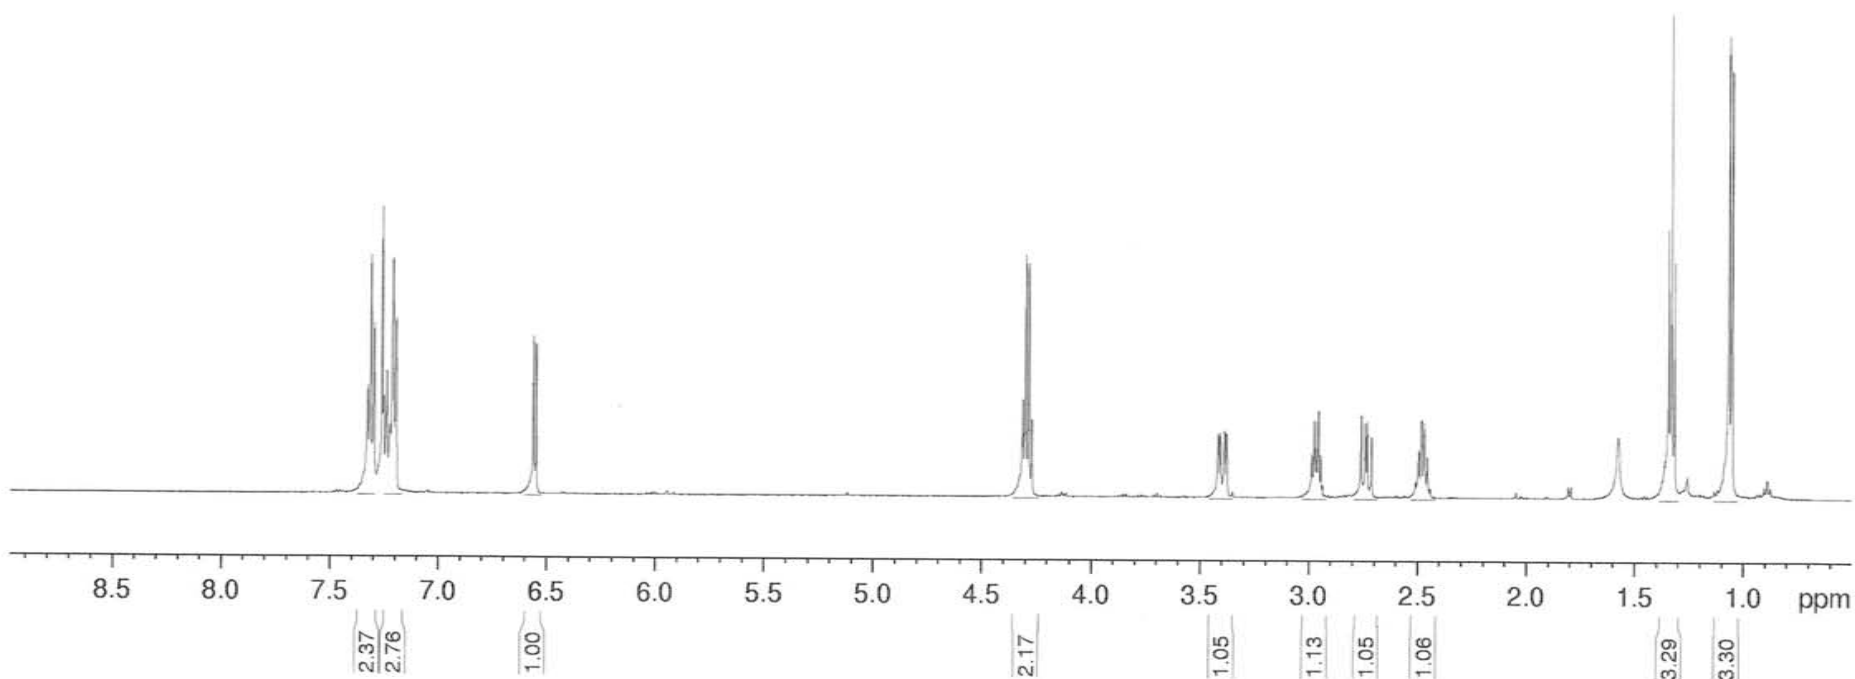

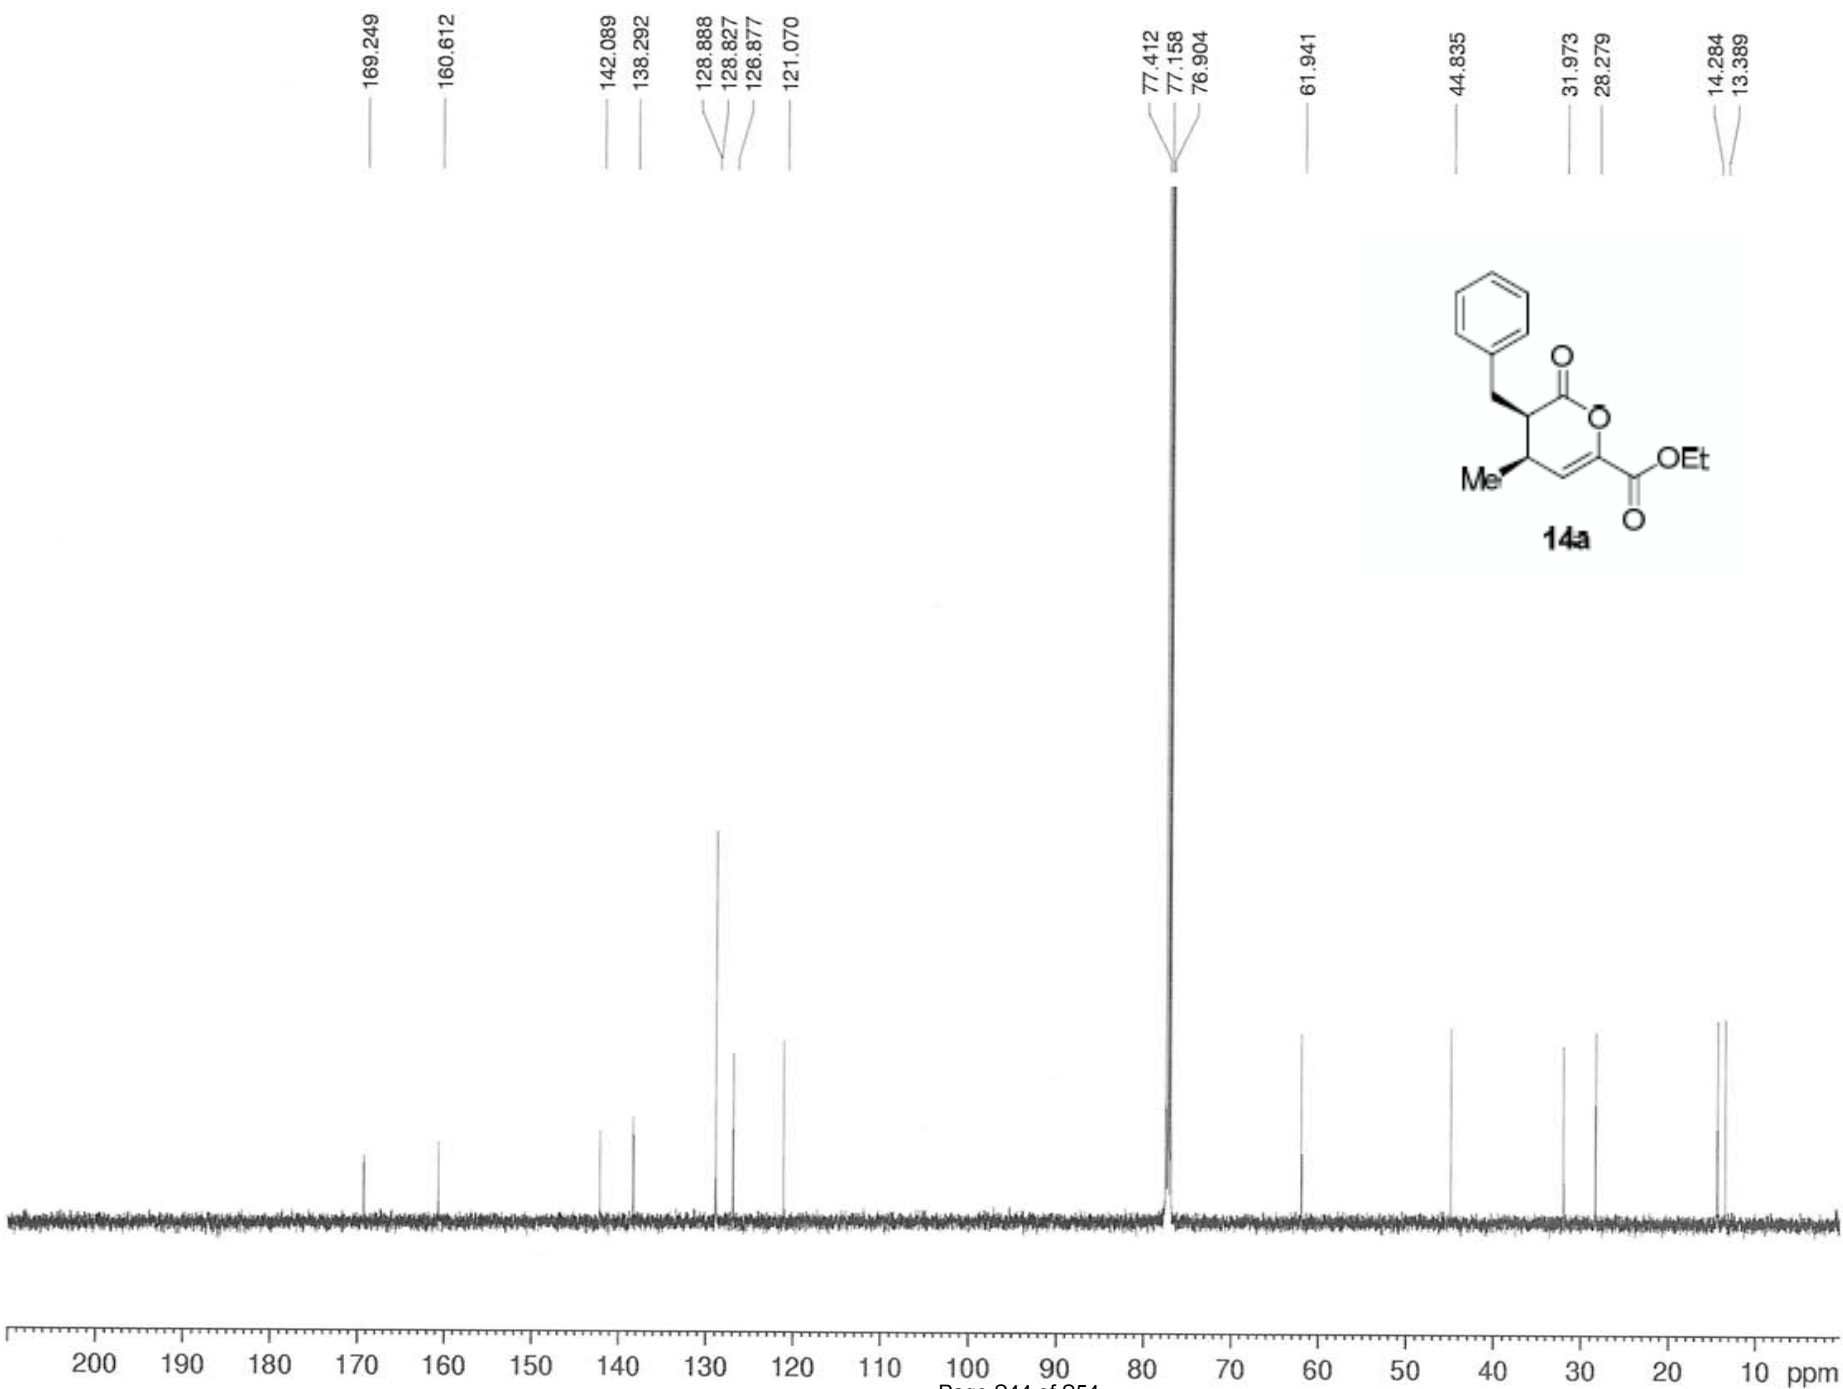

6.570  
6.558

4.315  
4.303  
4.301  
4.289  
4.287  
4.275  
4.272

2.821  
2.808  
2.795  
2.781  
2.767  
2.650  
2.636  
2.623  
2.609

1.391  
1.351  
1.349  
1.337  
1.335  
1.323  
1.320  
1.259  
1.245  
1.028  
1.014

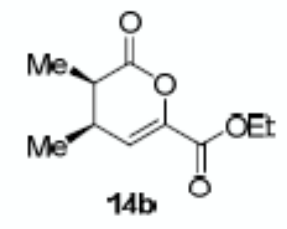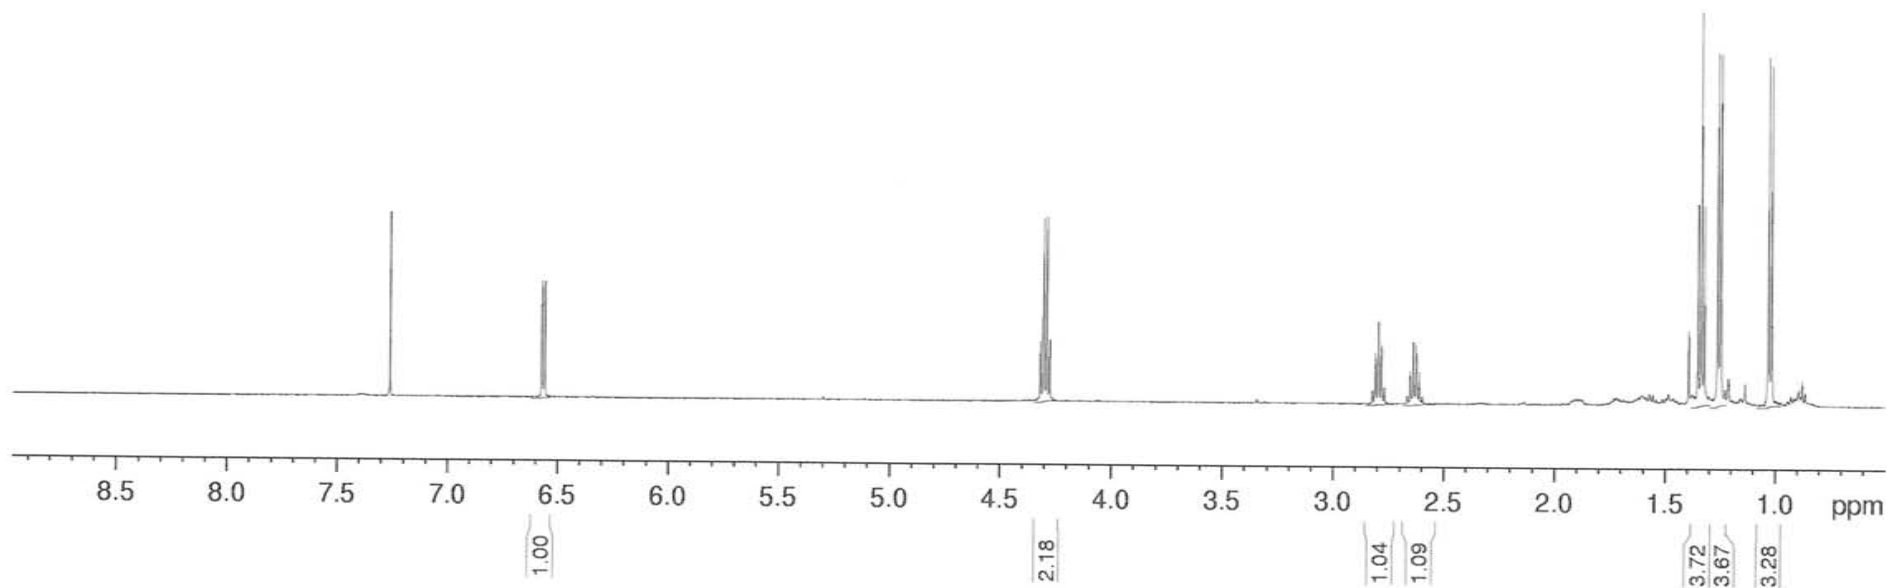

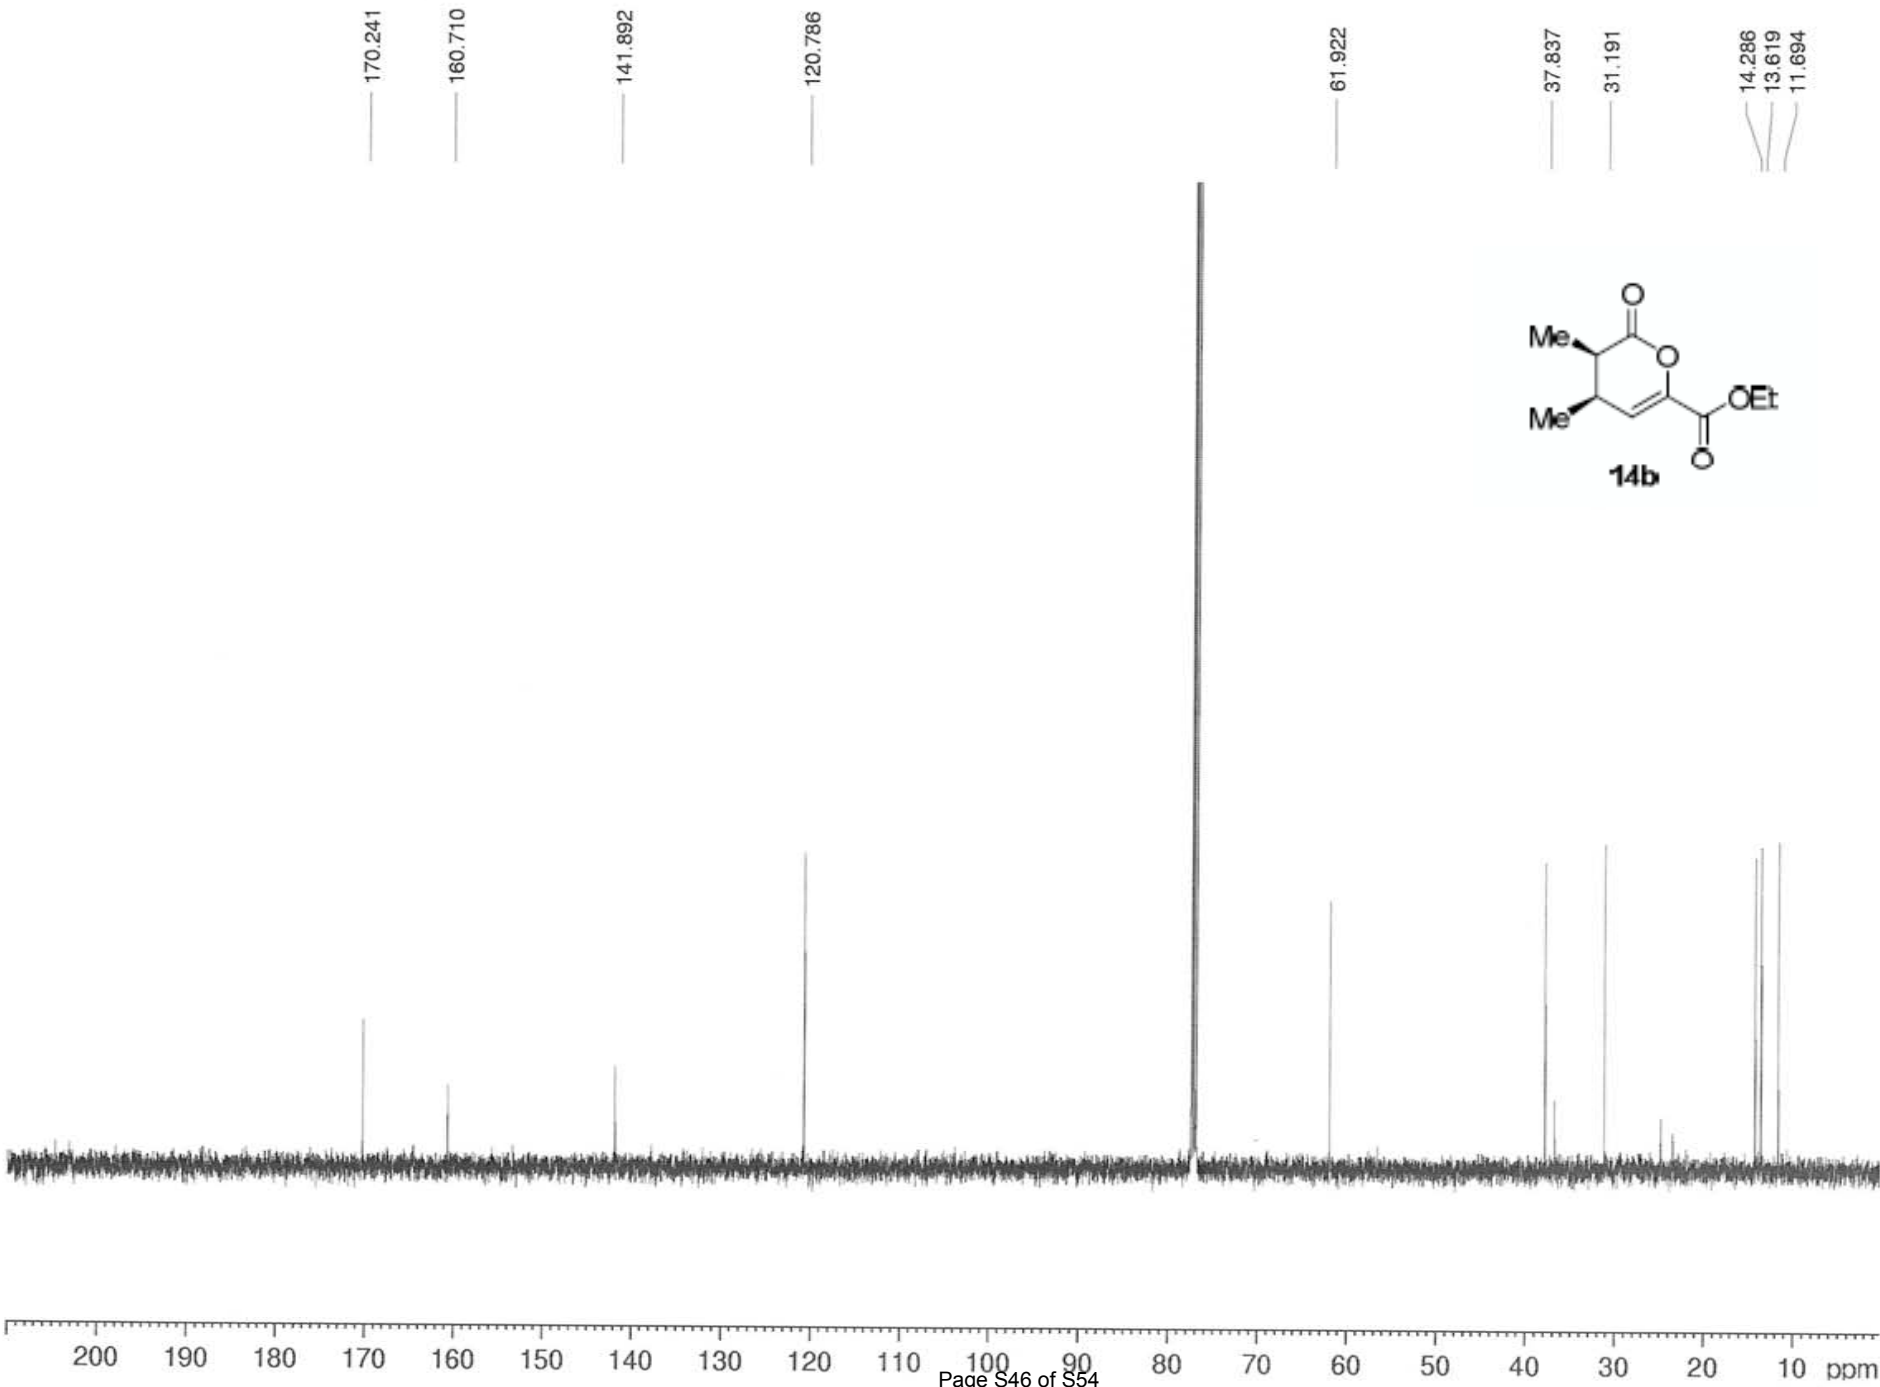

7.260  
6.503  
6.492  
4.325  
4.322  
4.311  
4.308  
4.296  
4.294  
4.282  
4.279  
2.564  
2.551  
2.544  
2.538  
1.905  
1.893  
1.885  
1.760  
1.734  
1.706  
1.680  
1.677  
1.650  
1.625  
1.589  
1.566  
1.545  
1.494  
1.486  
1.479  
1.474  
1.459  
1.434  
1.425  
1.412  
1.409  
1.404  
1.399  
1.392  
1.379  
1.365  
1.359  
1.351  
1.345  
1.338  
1.331  
1.317  
1.309  
1.296  
1.258  
1.252  
1.233  
1.227  
1.221  
1.208  
1.202  
1.196  
1.189  
1.169  
1.163  
1.144  
1.138  
1.113  
1.095  
1.088  
1.082  
1.063  
0.933  
0.919  
0.905  
0.878  
0.873  
0.854  
0.847

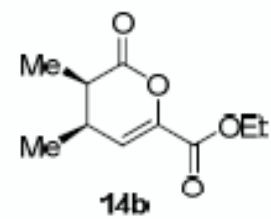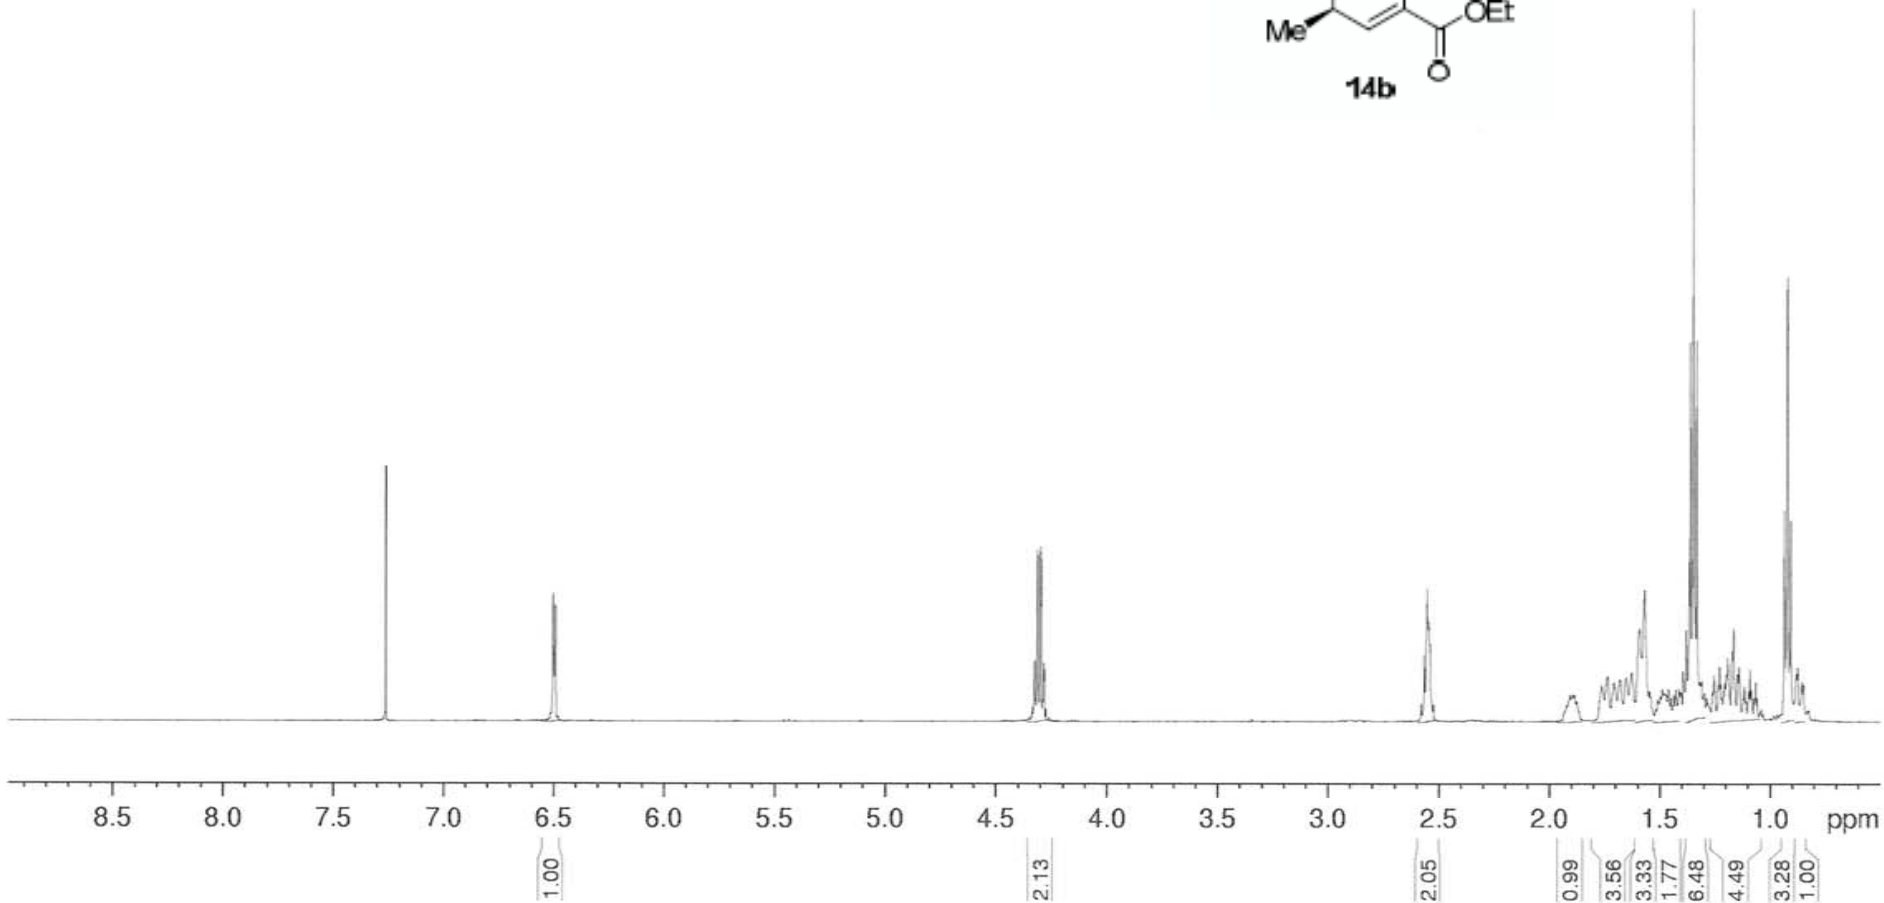

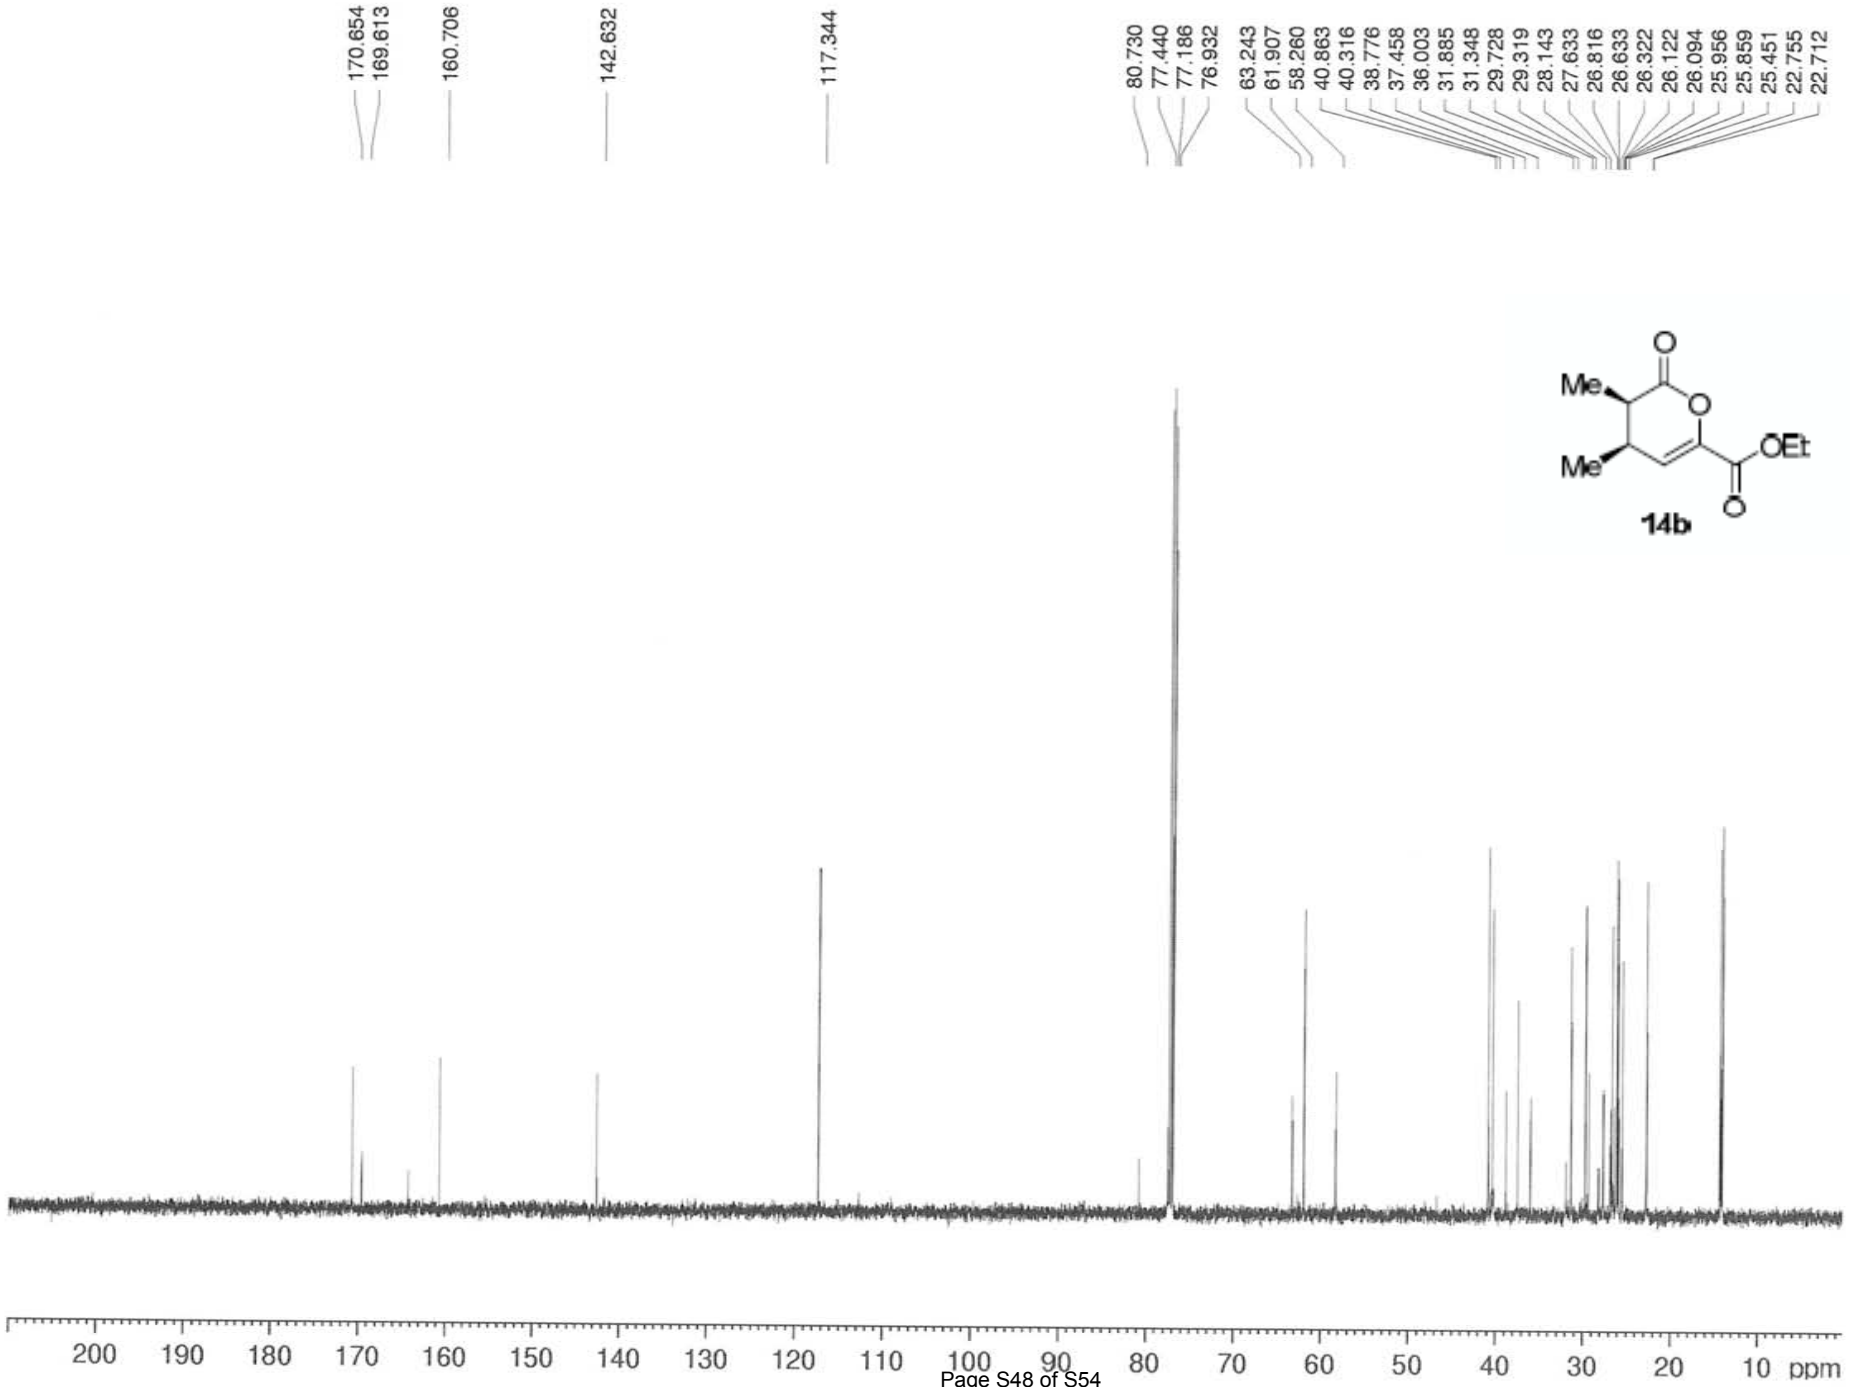



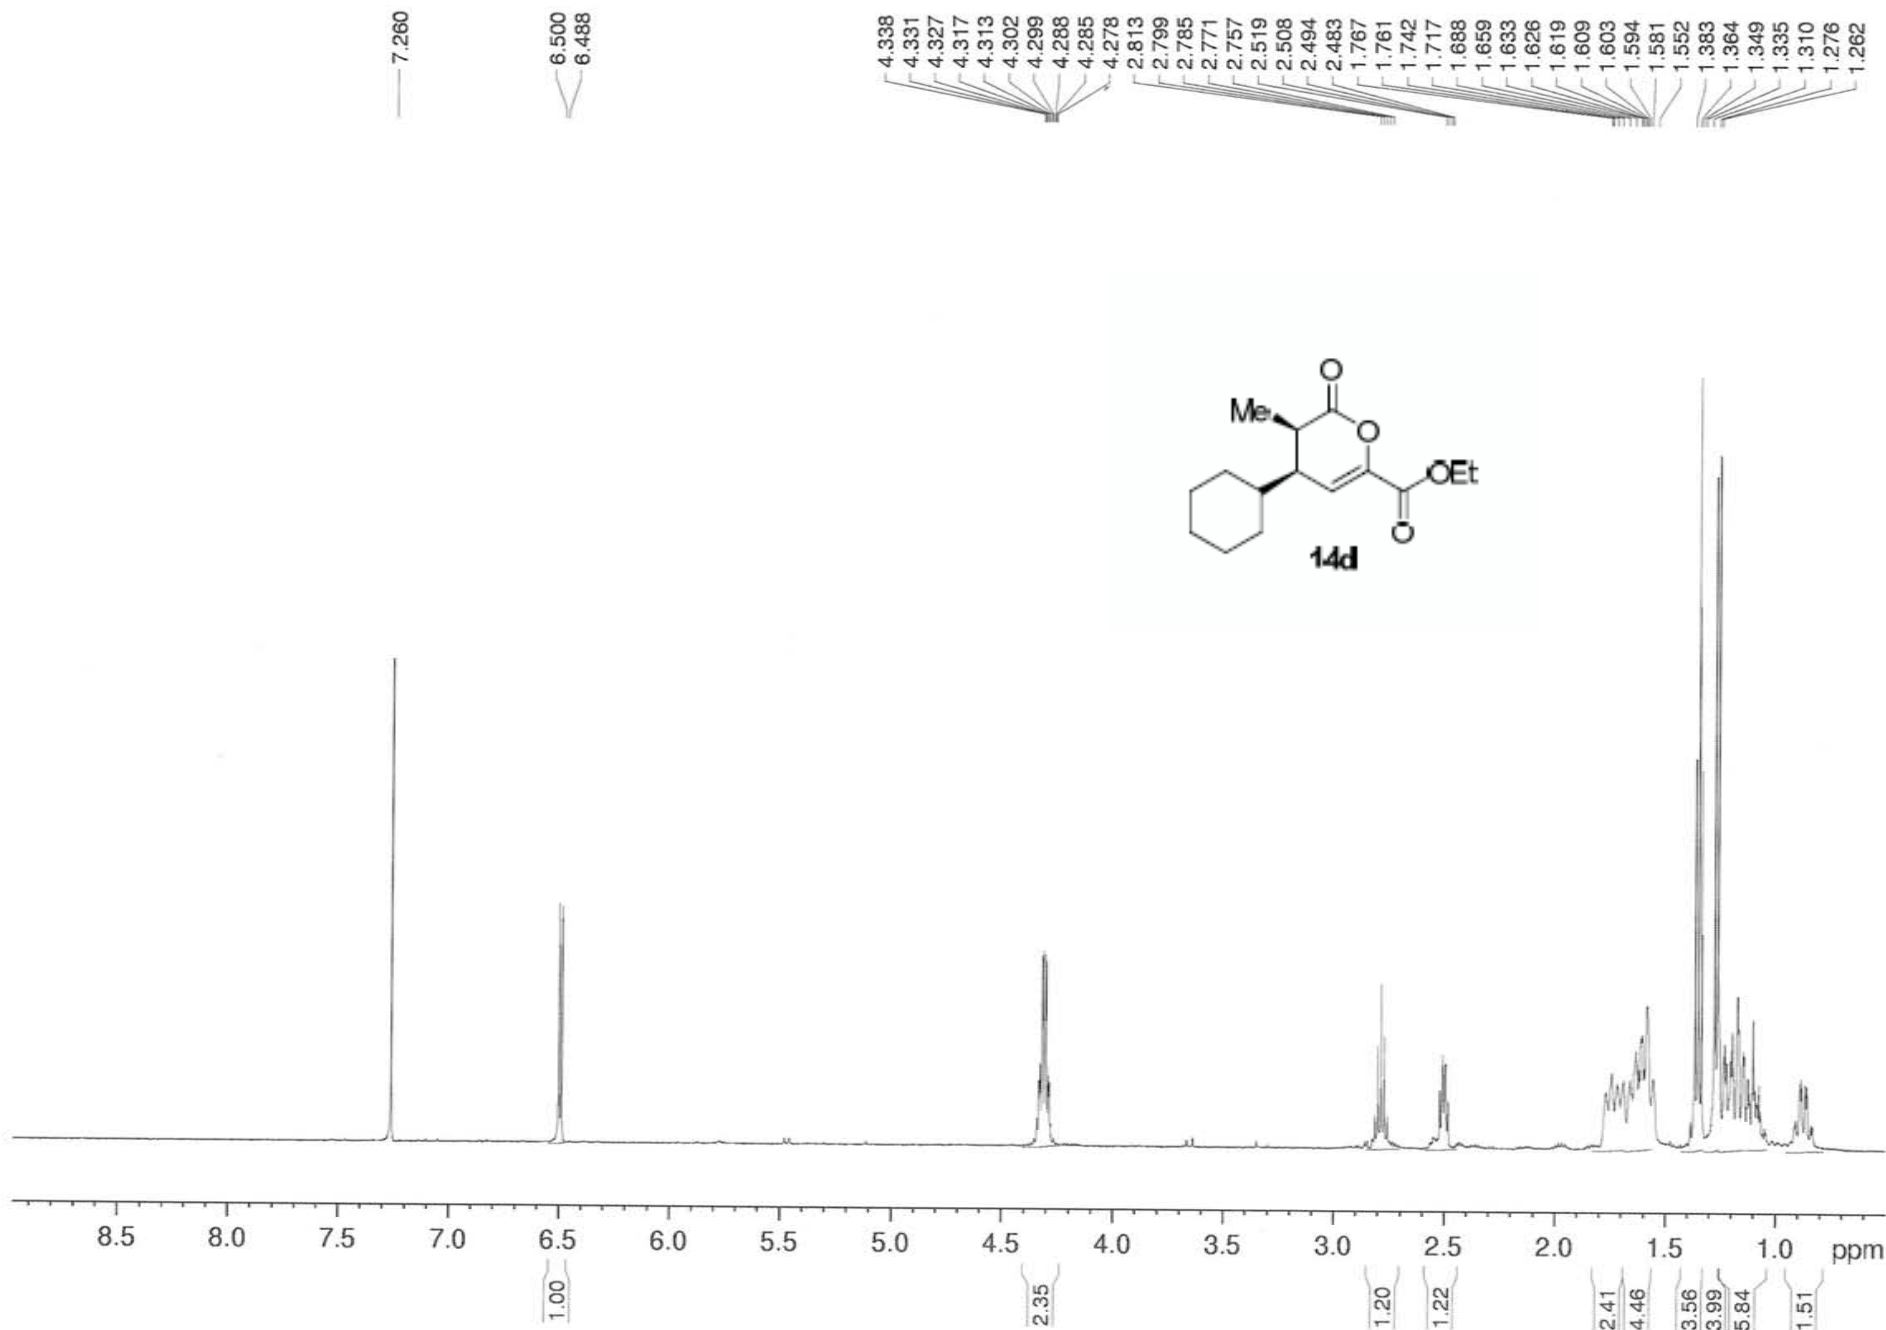

171.238

160.707

142.674

117.164

77.407

77.153

76.899

61.957

41.751

37.478

35.752

31.228

27.458

26.625

26.123

25.956

14.306

11.490

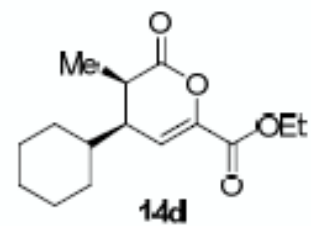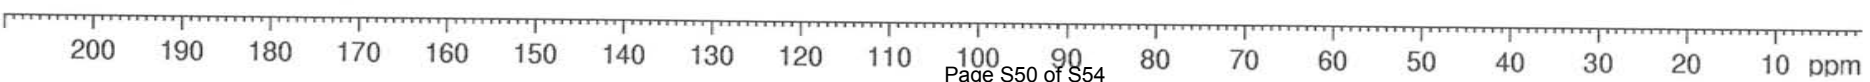

7.324  
7.308  
7.293  
7.260  
7.247  
7.232  
7.222  
7.207

6.466  
6.453

4.328  
4.314  
4.299  
4.285

3.414  
3.403  
3.385  
3.374

2.995  
2.982  
2.977  
2.965  
2.951  
2.805  
2.786  
2.776

2.757  
2.472  
2.459  
2.450  
2.436

2.155  
2.142  
2.132  
2.119

1.356  
1.342  
1.327  
1.049  
1.037  
1.025  
0.927  
0.913  
0.889

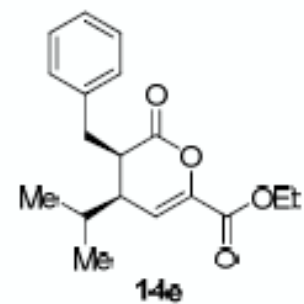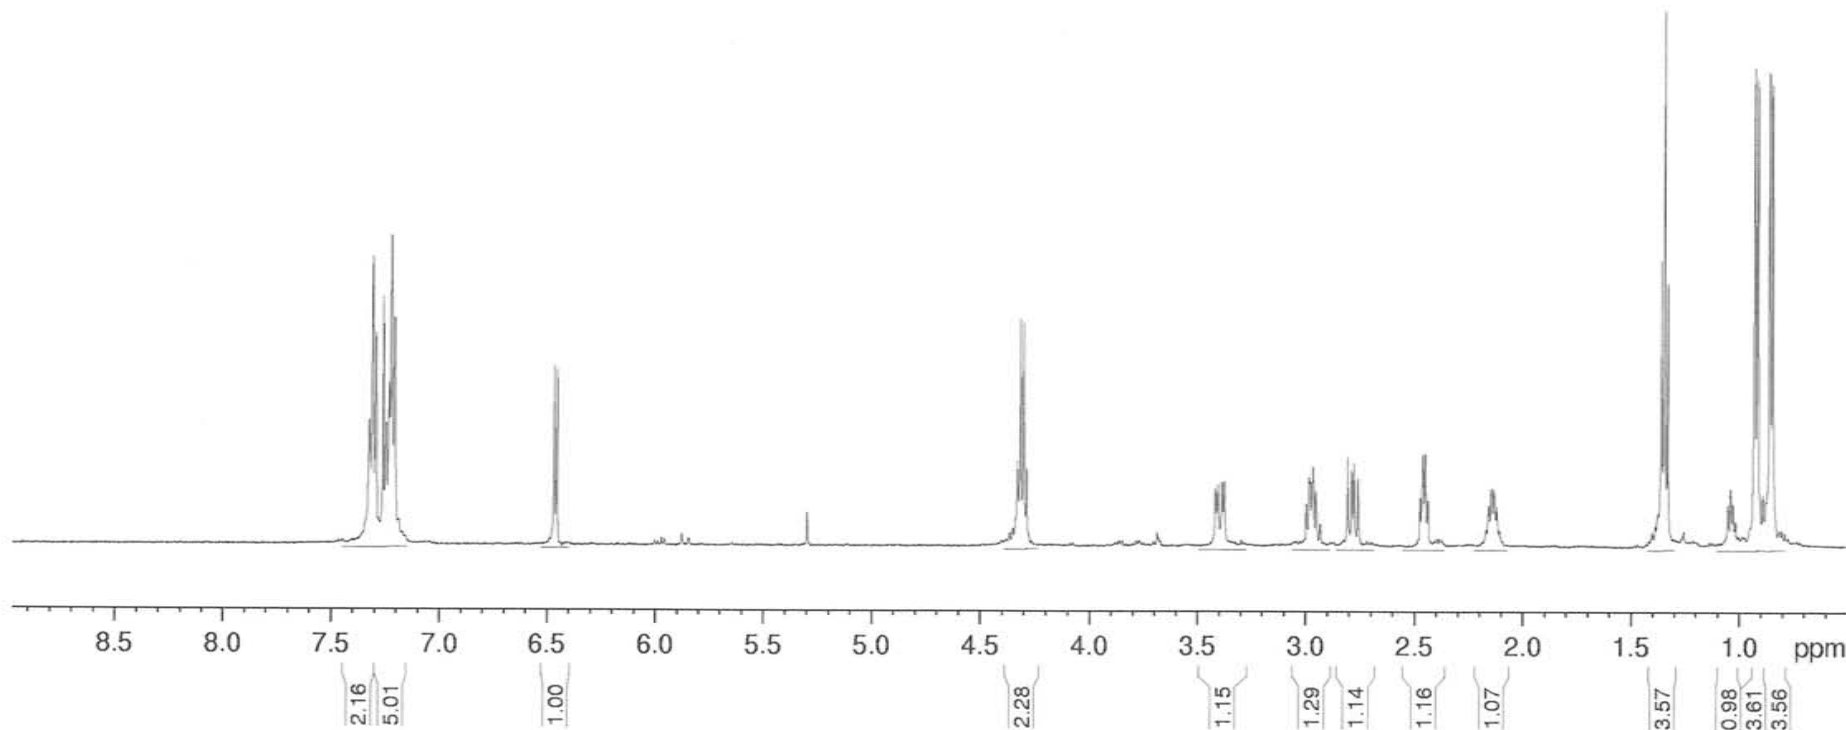

170.067  
160.552  
143.180  
138.519  
128.849  
128.779  
126.834  
116.406  
77.417  
77.163  
76.909  
61.990  
43.386  
39.696  
31.652  
27.545  
21.276  
16.702  
14.297

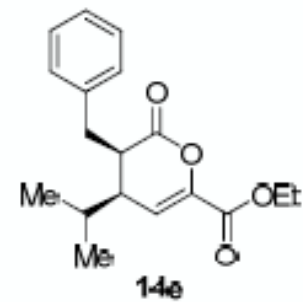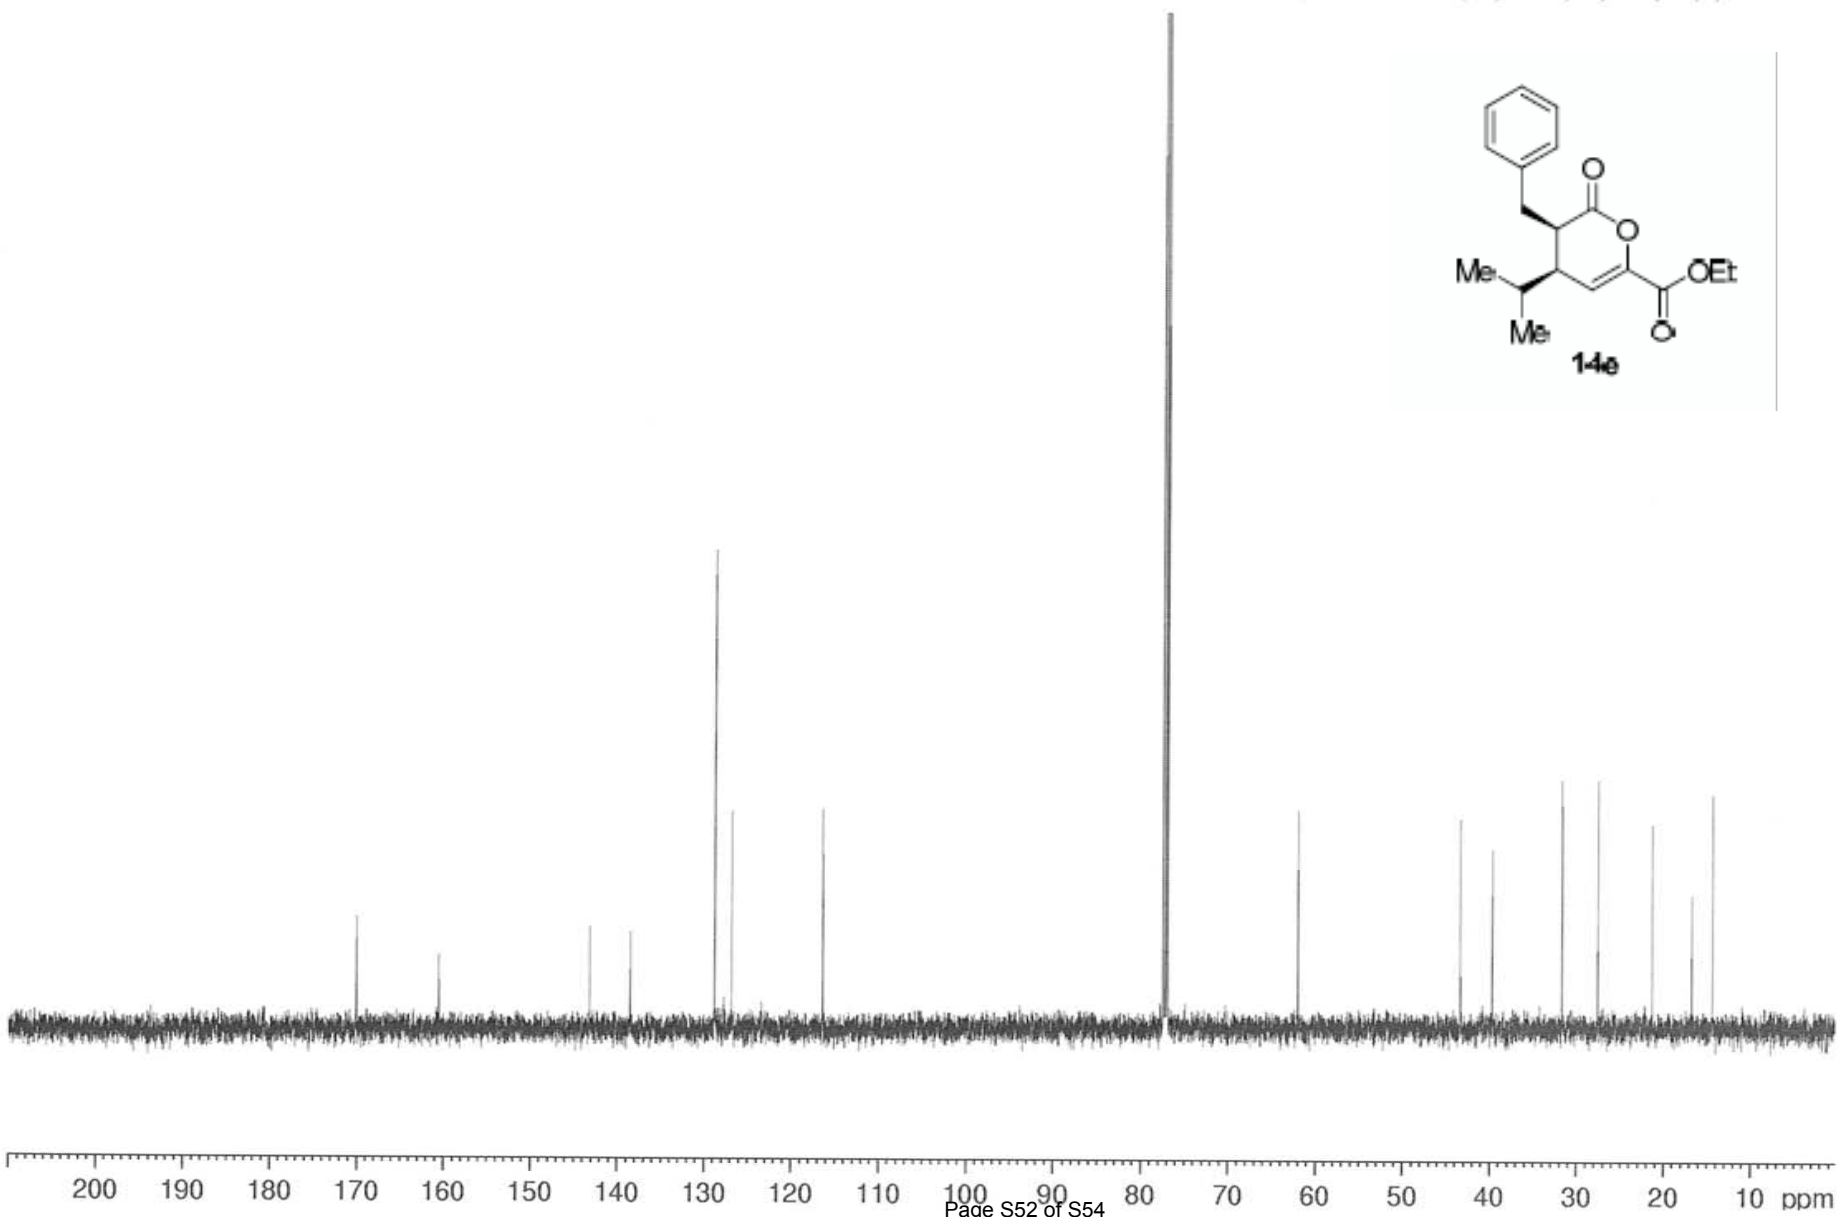

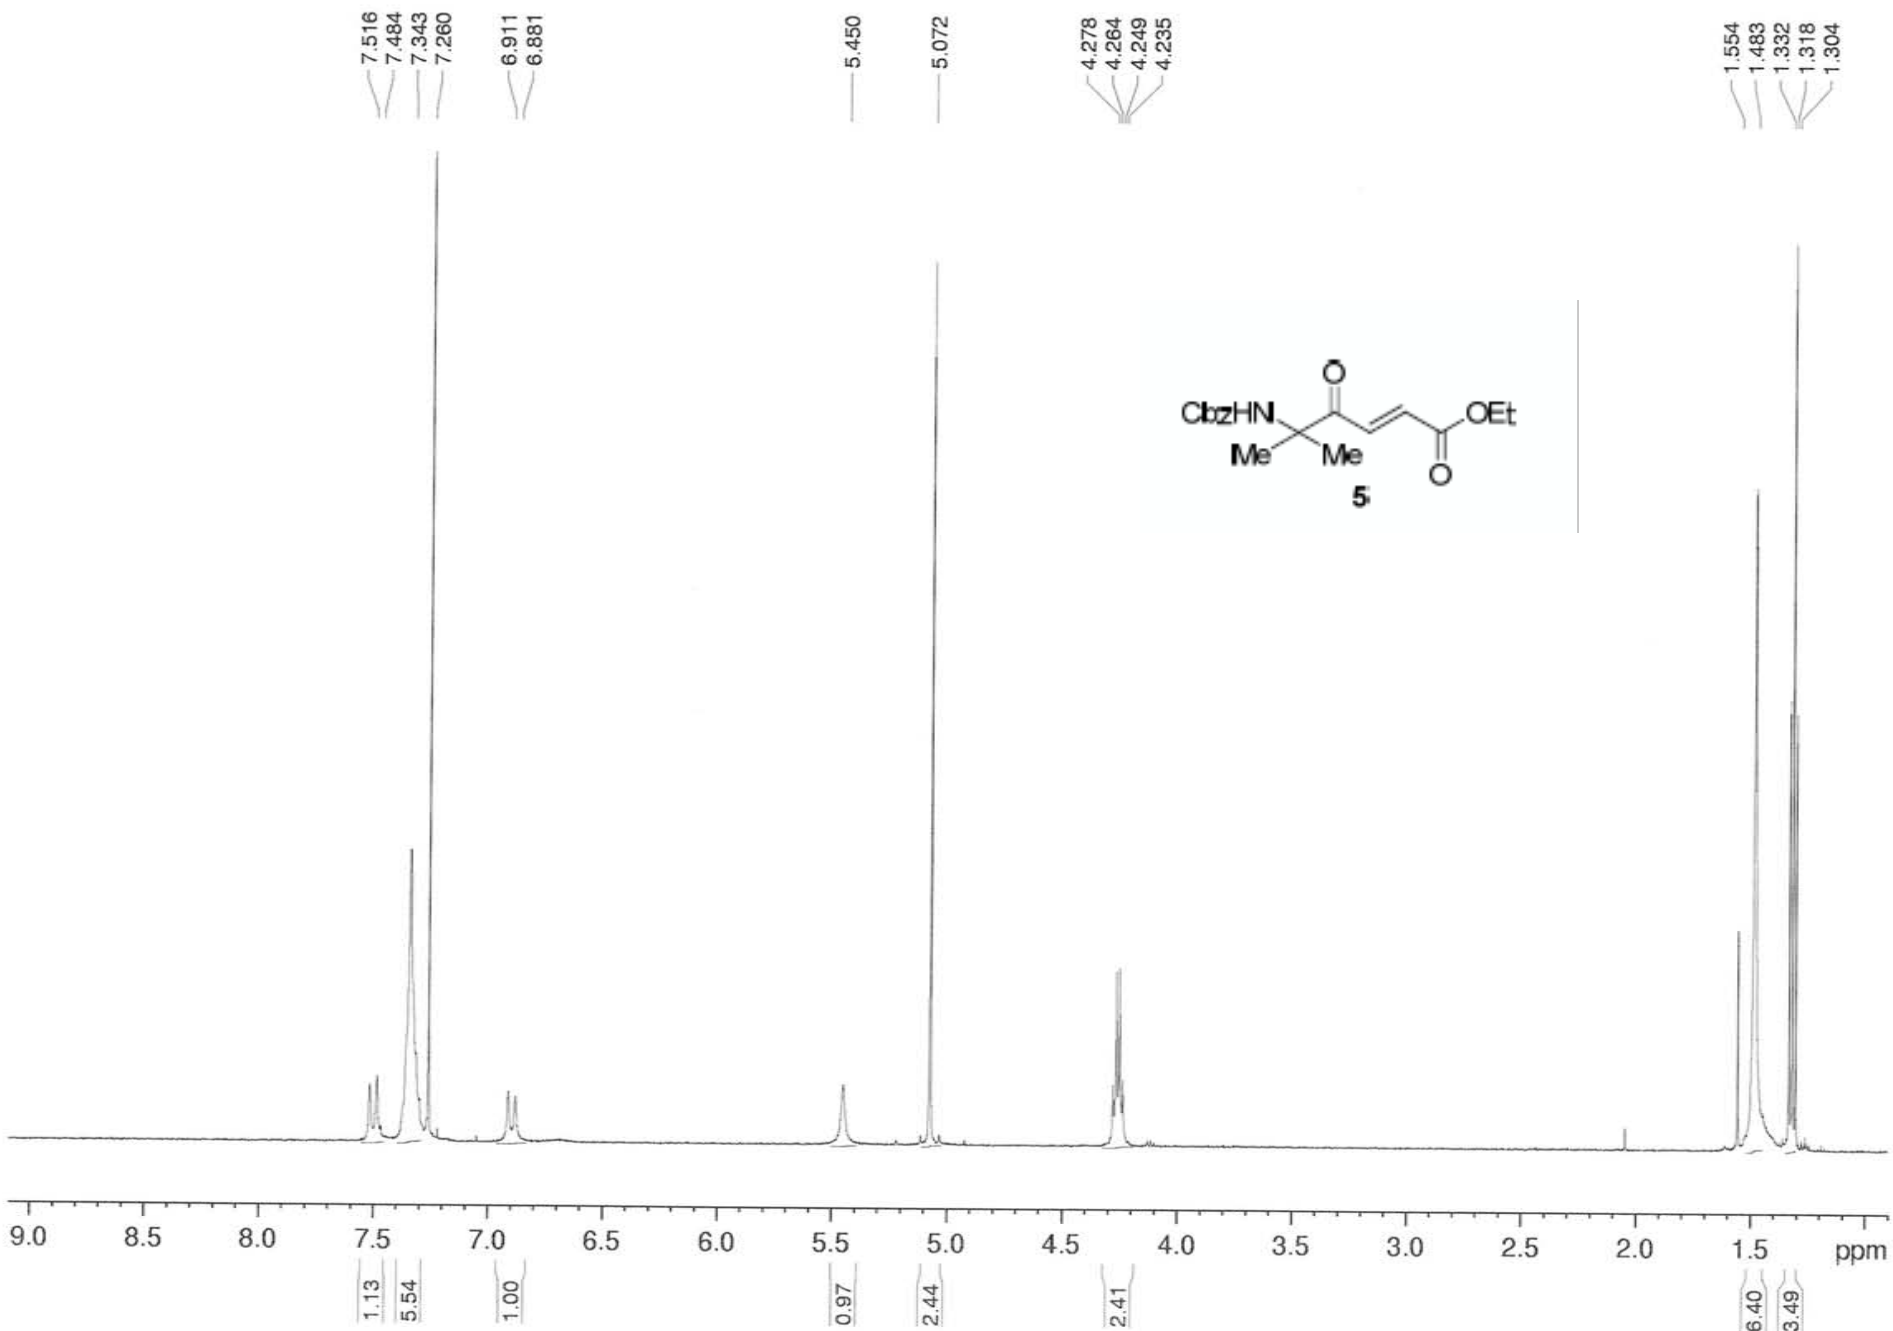

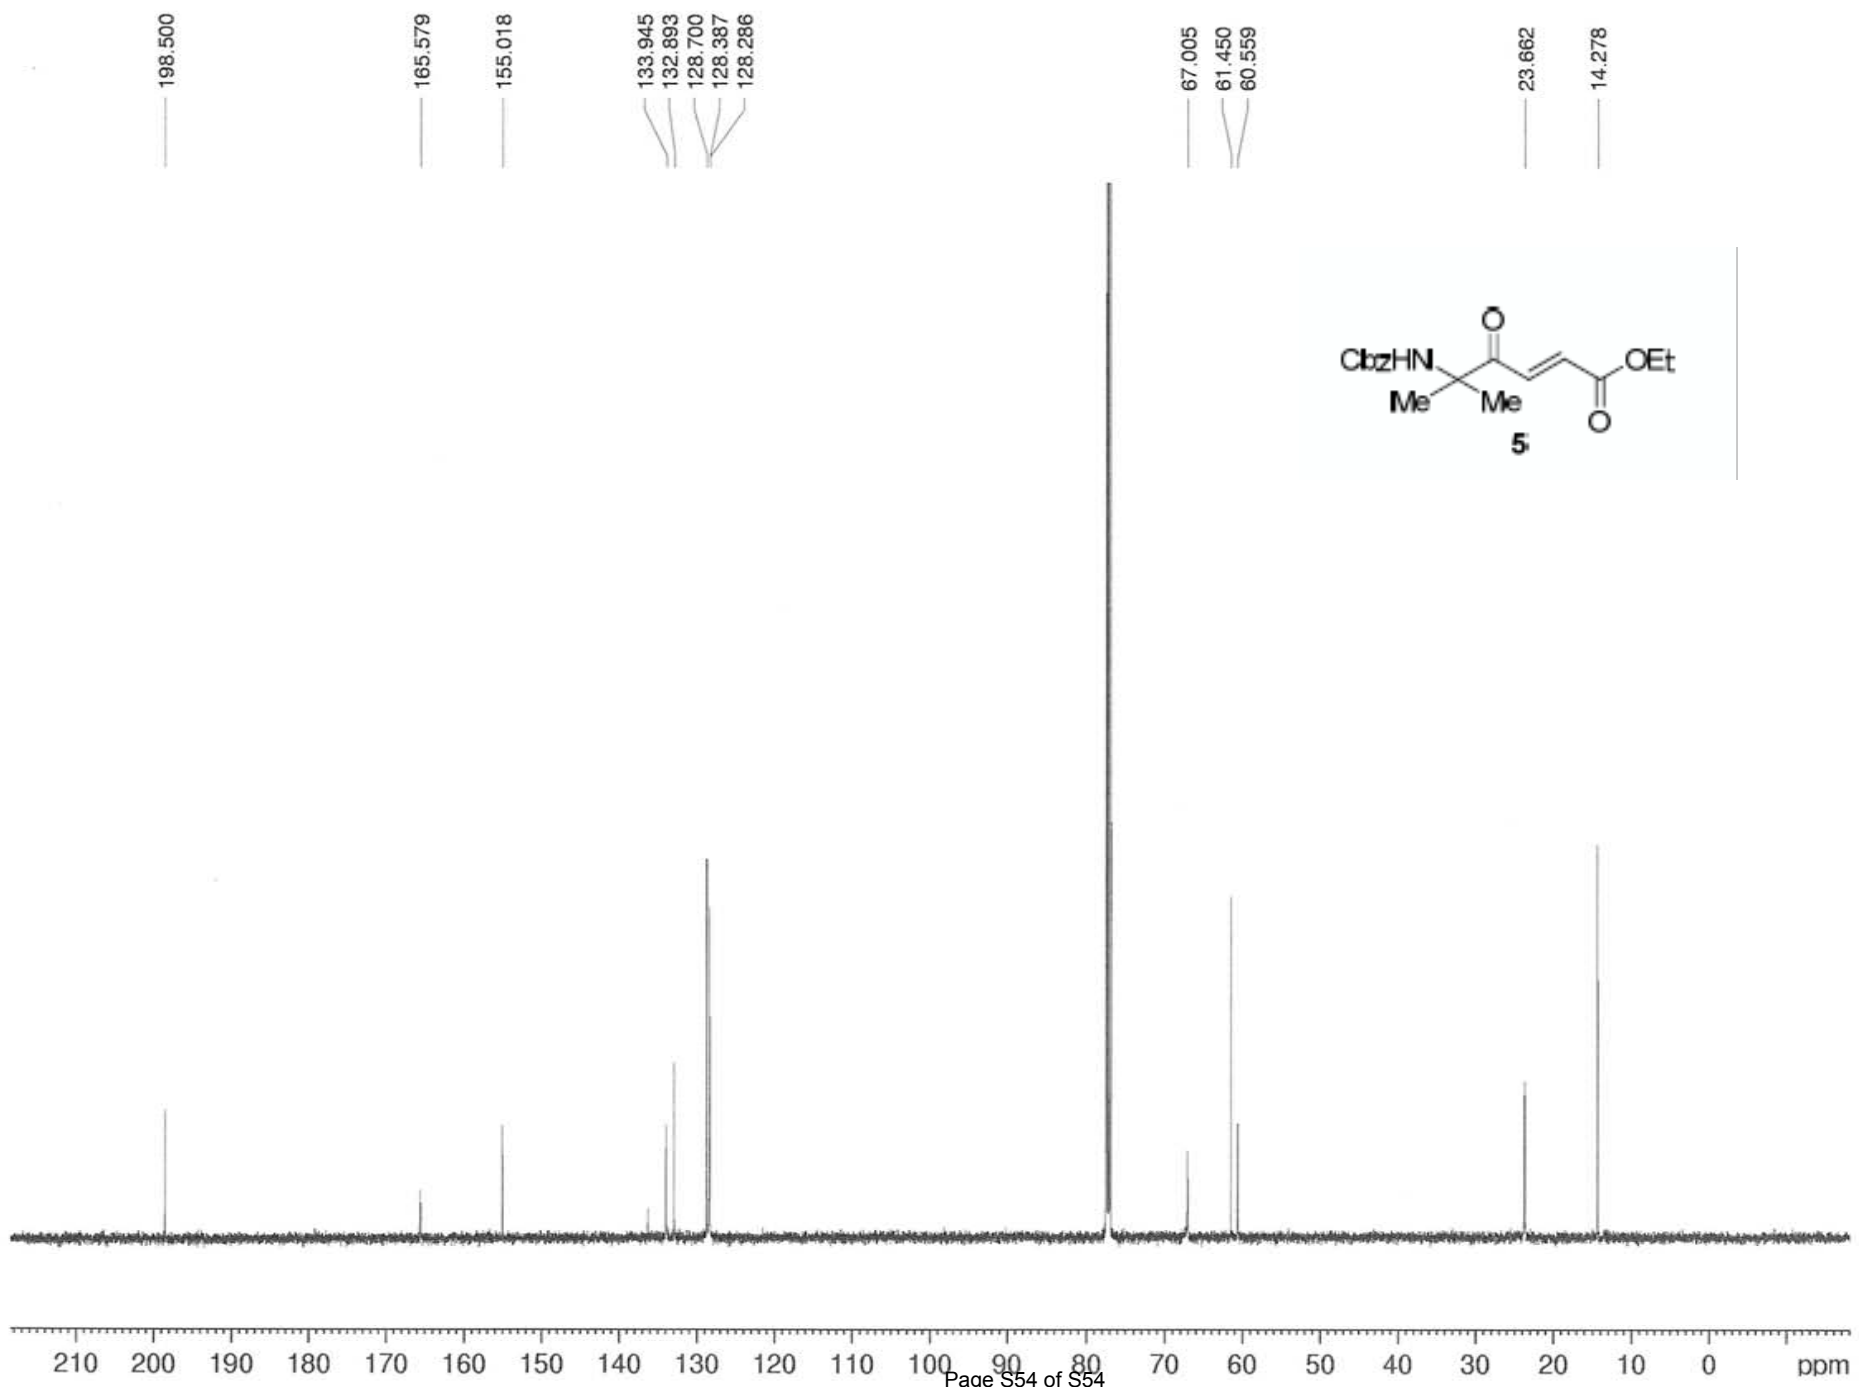

Supplement: 1007469107_Spectral_Data.pdf [file 1007469107_Spectral_Data.pdf]
